# Supplementary material for: The synthesis of ternary acetylides with tellurium: Li2TeC2 and Na2TeC2
Source: Royal Society of Chemistry journal article supplement (doi:10.1039/c5ra08983b), 2015-01-01
Supplement: c5ra08983b1.pdf [file c5ra08983b1.pdf]

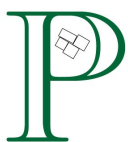

Poly Crystallography Inc.  
423 East Chicago Avenue, Naperville IL 60540-5407  
630-605-0274; [www.polycrystallography.com](http://www.polycrystallography.com)  
[Kaduk@polycrystallography.com](mailto:Kaduk@polycrystallography.com)

9 February 2014

Karoly Nemeth  
Department of Physics  
Illinois Institute of Technology  
3101 S. Dearborn St.  
Chicago IL 60616  
[nemeth@agni.phys.iit.edu](mailto:nemeth@agni.phys.iit.edu)

### **Li<sub>2</sub>C<sub>2</sub> 4 Feb 2014 -XRD Analysis**

#### **Discussion**

The sample of Li<sub>2</sub>C<sub>2</sub> from 4 February 2014 is 92.0(2) wt% Li<sub>2</sub>C<sub>2</sub> and 8.0(2) wt% LiOH (Figure 1). The Li<sub>2</sub>C<sub>2</sub> crystallizes in *Immm* with  $a = 3.649(2)$  and  $c = 5.440(4)$  Å. The Li is at 0,1/4,0 and the C at 0,0,0.376. The average crystallite size is 60(1) Å. Even though the crystallites are small, I had to include a small preferred orientation correction to obtain a good fit to the pattern (Figure 2). The texture index was 1.046.

The average crystallite size of the LiOH is ~165 Å, but I had difficulty in refining the profile coefficient. The broad low angle feature and the sharp peak at 13.0° arise from removing the anti-scatter screen, and do not come from the air-sensitive cell itself.

#### **Experimental**

Data collected by you from a specimen packed in the air-sensitive sample cell was processed. The X-ray powder pattern was measured (5-100° 2θ, 0.0202144° steps, 0.5 sec/step, 0.6 mm divergence slit, 2.5° Soller slits, 3 mm scatter screen height) on a Bruker D2 Phaser diffractometer equipped with a LynxEye position-sensitive detector. Quantitative phase analysis of the crystalline phases was carried out by the Rietveld method using GSAS [1].

James A. Kaduk

#### **References**

1. A. C. Larson and R. B. Von Dreele, "General Structure Analysis System, (GSAS)", Los Alamos National Laboratory Report LAUR 86-784 (2004).

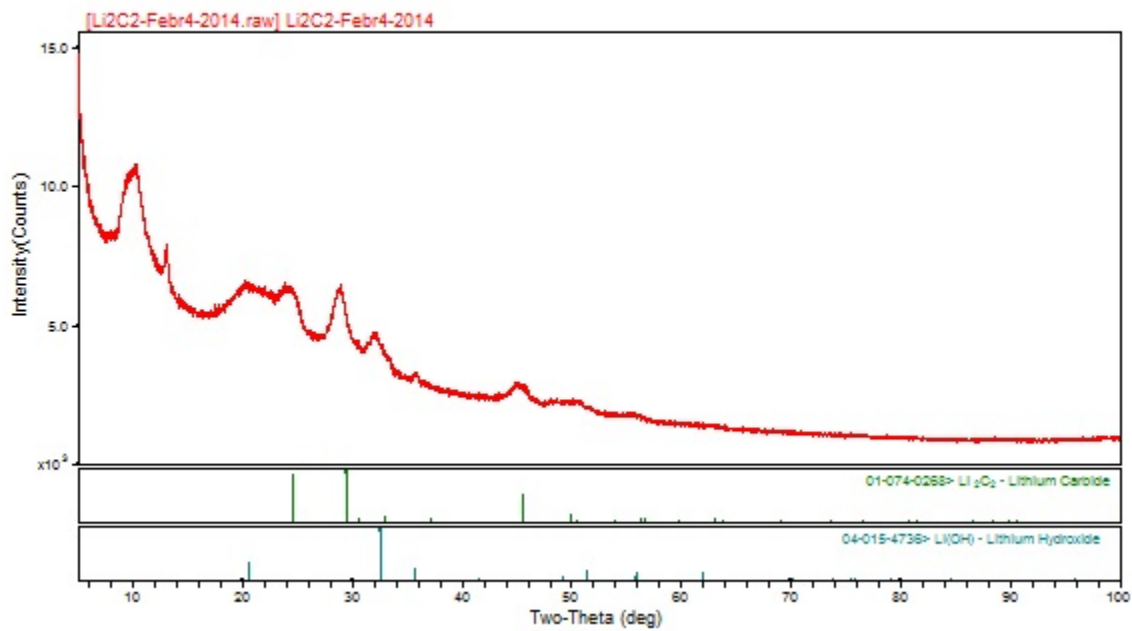

Figure 1

Li2 C2 4 Feb 2014 (LI2C2040214)

Hist 1

Lambda 1.5406 A, L-S cycle 153

Obsd. and Diff. Profiles

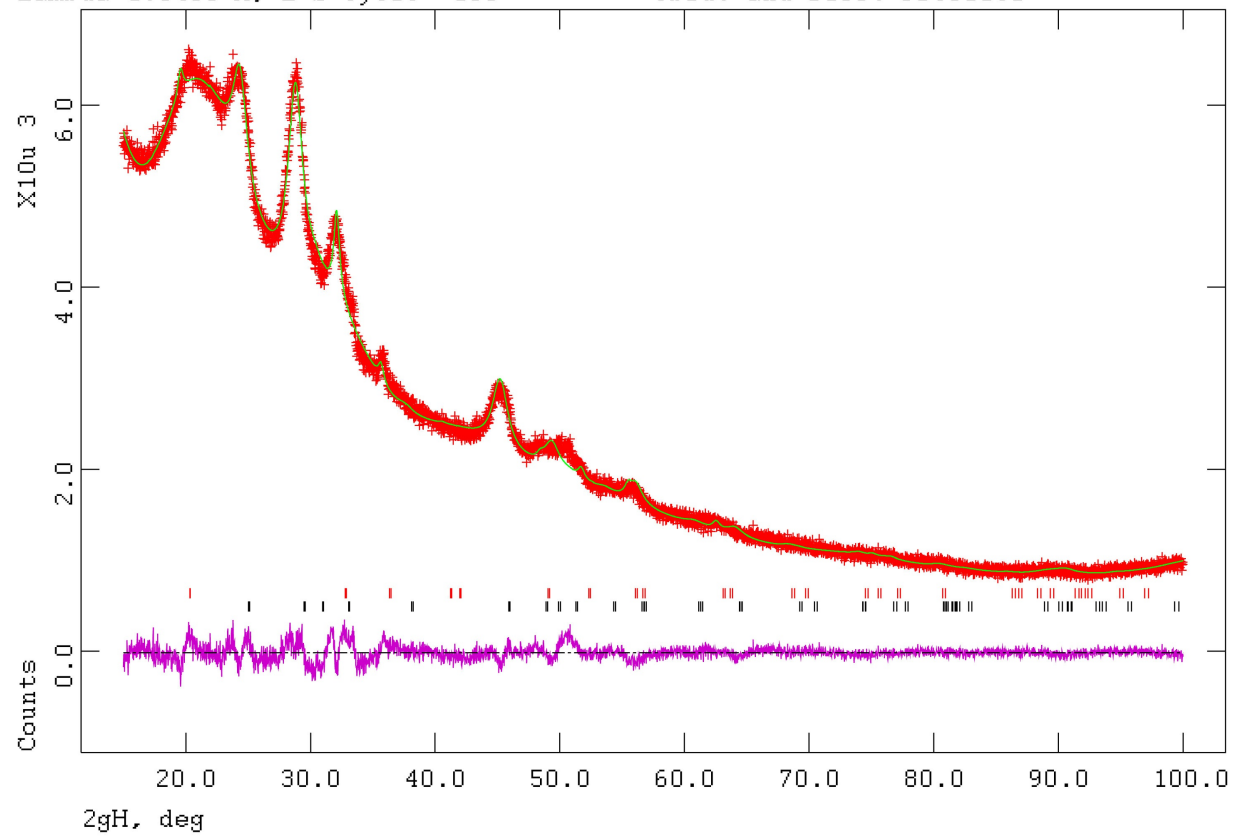

Figure 2
