# Supplementary material for: The synthesis of ternary acetylides with tellurium: Li2TeC2 and Na2TeC2
Source: Royal Society of Chemistry journal article supplement (doi:10.1039/c5ra08983b), 2015-01-01
Supplement: c5ra08983b2.pdf [file c5ra08983b2.pdf]

| Apr 08, 15 16:43 |                    | Li2TeC2-P-3m1-DFT-ent.txt |           |          |       |        |       |      |      |    |   | Page 1/1 |  |
|------------------|--------------------|---------------------------|-----------|----------|-------|--------|-------|------|------|----|---|----------|--|
| HEADER           | generated from xyz |                           |           |          |       |        |       |      |      |    |   |          |  |
| CRYST1           | 4.3556             | 4.3533                    | 6.0533    | 89.89    | 90.01 | 120.02 | P1    |      |      |    |   |          |  |
| SCALE1           | 0.229593           | 0.132654                  | -0.000131 | 0.000000 |       |        |       |      |      |    |   |          |  |
| SCALE2           | 0.000004           | 0.265301                  | -0.000284 | 0.000000 |       |        |       |      |      |    |   |          |  |
| SCALE3           | 0.000008           | -0.000188                 | 0.165198  | 0.000000 |       |        |       |      |      |    |   |          |  |
| HETATM           | 1                  | Te1                       | UNK       | 1        | 0.000 | 0.000  | 0.000 | 1.00 | 0.00 | Te |   |          |  |
| HETATM           | 2                  | Li1                       | UNK       | 1        | 2.178 | 1.262  | 4.450 | 1.00 | 0.00 | Li |   |          |  |
| HETATM           | 3                  | C1                        | UNK       | 1        | 0.000 | 0.003  | 3.659 | 1.00 | 0.00 | C  |   |          |  |
| HETATM           | 4                  | C1                        | UNK       | 1        | 0.000 | 0.003  | 2.395 | 1.00 | 0.00 | C  |   |          |  |
| HETATM           | 5                  | Li1                       | UNK       | 1        | 0.000 | 2.514  | 1.607 | 1.00 | 0.00 | Li |   |          |  |
| MASTER           | 0                  | 0                         | 0         | 0        | 0     | 0      | 0     | 3    | 2    | 0  | 2 | 0        |  |
| END              |                    |                           |           |          |       |        |       |      |      |    |   |          |  |
