# Supplementary material for: The synthesis of ternary acetylides with tellurium: Li2TeC2 and Na2TeC2
Source: Royal Society of Chemistry journal article supplement (doi:10.1039/c5ra08983b), 2015-01-01
Supplement: c5ra08983b4.pdf [file c5ra08983b4.pdf]

| Apr 08, 15 16:48 |                    | Na <sub>2</sub> TeC <sub>2</sub> -I4mmm-DFT-ent.txt |          |          |       |       |       |      |      |    |   | Page 1/1 |  |
|------------------|--------------------|-----------------------------------------------------|----------|----------|-------|-------|-------|------|------|----|---|----------|--|
| HEADER           | generated from xyz |                                                     |          |          |       |       |       |      |      |    |   |          |  |
| CRYST1           | 5.7340             | 5.7340                                              | 6.1357   | 90.00    | 90.00 | 90.00 | P1    |      |      |    |   |          |  |
| SCALE1           | 0.174398           | -0.000000                                           | 0.000000 | 0.000000 |       |       |       |      |      |    |   |          |  |
| SCALE2           | -0.000000          | 0.174398                                            | 0.000000 | 0.000000 |       |       |       |      |      |    |   |          |  |
| SCALE3           | 0.000000           | 0.000000                                            | 0.162981 | 0.000000 |       |       |       |      |      |    |   |          |  |
| HETATM           | 1                  | C1                                                  | UNK      | 1        | 0.000 | 0.000 | 5.505 | 1.00 | 0.00 | C  |   |          |  |
| HETATM           | 2                  | Na1                                                 | UNK      | 1        | 0.000 | 2.867 | 1.534 | 1.00 | 0.00 | Na |   |          |  |
| HETATM           | 3                  | Te1                                                 | UNK      | 1        | 0.000 | 0.000 | 3.068 | 1.00 | 0.00 | Te |   |          |  |
| HETATM           | 4                  | C1                                                  | UNK      | 1        | 0.000 | 0.000 | 0.631 | 1.00 | 0.00 | C  |   |          |  |
| HETATM           | 5                  | Na1                                                 | UNK      | 1        | 2.867 | 0.000 | 4.602 | 1.00 | 0.00 | Na |   |          |  |
| HETATM           | 6                  | C1                                                  | UNK      | 1        | 2.867 | 2.867 | 2.437 | 1.00 | 0.00 | C  |   |          |  |
| HETATM           | 7                  | C1                                                  | UNK      | 1        | 2.867 | 2.867 | 3.699 | 1.00 | 0.00 | C  |   |          |  |
| HETATM           | 8                  | Na1                                                 | UNK      | 1        | 0.000 | 2.867 | 4.602 | 1.00 | 0.00 | Na |   |          |  |
| HETATM           | 9                  | Na1                                                 | UNK      | 1        | 2.867 | 0.000 | 1.534 | 1.00 | 0.00 | Na |   |          |  |
| HETATM           | 10                 | Te1                                                 | UNK      | 1        | 2.867 | 2.867 | 0.000 | 1.00 | 0.00 | Te |   |          |  |
| MASTER           | 0                  | 0                                                   | 0        | 0        | 0     | 0     | 0     | 3    | 2    | 0  | 2 | 0        |  |
| END              |                    |                                                     |          |          |       |       |       |      |      |    |   |          |  |
