# Supplementary material for: The synthesis of ternary acetylides with tellurium: Li2TeC2 and Na2TeC2
Source: Royal Society of Chemistry journal article supplement (doi:10.1039/c5ra08983b), 2015-01-01
Supplement: c5ra08983b5.pdf [file c5ra08983b5.pdf]

| Dec 04, 14 17:43 | Na <sub>2</sub> TeC <sub>2</sub> -xy.txt | Page 1/69 |
|------------------|------------------------------------------|-----------|
| 4.9978           | 11843.0000                               |           |
| 5.0180           | 11574.0000                               |           |
| 5.0382           | 11063.0000                               |           |
| 5.0585           | 10362.0000                               |           |
| 5.0787           | 9998.0000                                |           |
| 5.0989           | 9726.0000                                |           |
| 5.1191           | 9840.0000                                |           |
| 5.1393           | 9753.0000                                |           |
| 5.1595           | 9639.0000                                |           |
| 5.1797           | 9387.0000                                |           |
| 5.2000           | 9352.0000                                |           |
| 5.2202           | 9216.0000                                |           |
| 5.2404           | 9292.0000                                |           |
| 5.2606           | 9021.0000                                |           |
| 5.2808           | 9116.0000                                |           |
| 5.3010           | 8972.0000                                |           |
| 5.3213           | 8857.0000                                |           |
| 5.3415           | 8630.0000                                |           |
| 5.3617           | 8776.0000                                |           |
| 5.3819           | 8701.0000                                |           |
| 5.4021           | 8467.0000                                |           |
| 5.4223           | 8605.0000                                |           |
| 5.4425           | 8480.0000                                |           |
| 5.4628           | 8458.0000                                |           |
| 5.4830           | 8372.0000                                |           |
| 5.5032           | 8334.0000                                |           |
| 5.5234           | 8106.0000                                |           |
| 5.5436           | 8321.0000                                |           |
| 5.5638           | 8340.0000                                |           |
| 5.5840           | 8040.0000                                |           |
| 5.6043           | 7992.0000                                |           |
| 5.6245           | 8063.0000                                |           |
| 5.6447           | 8036.0000                                |           |
| 5.6649           | 7976.0000                                |           |
| 5.6851           | 7784.0000                                |           |
| 5.7053           | 7777.0000                                |           |
| 5.7255           | 7920.0000                                |           |
| 5.7458           | 7649.0000                                |           |
| 5.7660           | 7747.0000                                |           |
| 5.7862           | 7596.0000                                |           |
| 5.8064           | 7491.0000                                |           |
| 5.8266           | 7604.0000                                |           |
| 5.8468           | 7647.0000                                |           |
| 5.8670           | 7491.0000                                |           |
| 5.8873           | 7419.0000                                |           |
| 5.9075           | 7312.0000                                |           |
| 5.9277           | 7275.0000                                |           |
| 5.9479           | 7374.0000                                |           |
| 5.9681           | 7448.0000                                |           |
| 5.9883           | 7371.0000                                |           |
| 6.0085           | 7227.0000                                |           |
| 6.0288           | 7074.0000                                |           |
| 6.0490           | 7167.0000                                |           |
| 6.0692           | 7041.0000                                |           |
| 6.0894           | 7015.0000                                |           |
| 6.1096           | 7072.0000                                |           |
| 6.1298           | 7245.0000                                |           |
| 6.1500           | 7135.0000                                |           |
| 6.1703           | 7000.0000                                |           |
| 6.1905           | 7000.0000                                |           |
| 6.2107           | 6726.0000                                |           |
| 6.2309           | 7044.0000                                |           |
| 6.2511           | 6886.0000                                |           |
| 6.2713           | 6964.0000                                |           |
| 6.2915           | 6596.0000                                |           |
| 6.3118           | 6819.0000                                |           |
| 6.3320           | 6752.0000                                |           |
| 6.3522           | 6729.0000                                |           |
| 6.3724           | 6640.0000                                |           |

| Dec 04, 14 17:43 | Na <sub>2</sub> TeC <sub>2</sub> -xy.txt | Page 2/69 |
|------------------|------------------------------------------|-----------|
| 6.3926           | 6781.0000                                |           |
| 6.4128           | 6522.0000                                |           |
| 6.4330           | 6499.0000                                |           |
| 6.4533           | 6578.0000                                |           |
| 6.4735           | 6630.0000                                |           |
| 6.4937           | 6519.0000                                |           |
| 6.5139           | 6630.0000                                |           |
| 6.5341           | 6660.0000                                |           |
| 6.5543           | 6527.0000                                |           |
| 6.5745           | 6524.0000                                |           |
| 6.5948           | 6478.0000                                |           |
| 6.6150           | 6479.0000                                |           |
| 6.6352           | 6574.0000                                |           |
| 6.6554           | 6594.0000                                |           |
| 6.6756           | 6568.0000                                |           |
| 6.6958           | 6529.0000                                |           |
| 6.7160           | 6526.0000                                |           |
| 6.7363           | 6437.0000                                |           |
| 6.7565           | 6650.0000                                |           |
| 6.7767           | 6494.0000                                |           |
| 6.7969           | 6438.0000                                |           |
| 6.8171           | 6351.0000                                |           |
| 6.8373           | 6331.0000                                |           |
| 6.8575           | 6470.0000                                |           |
| 6.8778           | 6372.0000                                |           |
| 6.8980           | 6502.0000                                |           |
| 6.9182           | 6342.0000                                |           |
| 6.9384           | 6251.0000                                |           |
| 6.9586           | 6339.0000                                |           |
| 6.9788           | 6246.0000                                |           |
| 6.9990           | 6338.0000                                |           |
| 7.0193           | 6366.0000                                |           |
| 7.0395           | 6196.0000                                |           |
| 7.0597           | 6191.0000                                |           |
| 7.0799           | 6332.0000                                |           |
| 7.1001           | 6262.0000                                |           |
| 7.1203           | 6321.0000                                |           |
| 7.1405           | 6116.0000                                |           |
| 7.1608           | 6357.0000                                |           |
| 7.1810           | 6292.0000                                |           |
| 7.2012           | 6211.0000                                |           |
| 7.2214           | 6219.0000                                |           |
| 7.2416           | 6415.0000                                |           |
| 7.2618           | 6299.0000                                |           |
| 7.2820           | 6301.0000                                |           |
| 7.3023           | 6314.0000                                |           |
| 7.3225           | 6186.0000                                |           |
| 7.3427           | 6149.0000                                |           |
| 7.3629           | 6261.0000                                |           |
| 7.3831           | 6152.0000                                |           |
| 7.4033           | 6393.0000                                |           |
| 7.4235           | 6207.0000                                |           |
| 7.4438           | 6313.0000                                |           |
| 7.4640           | 6212.0000                                |           |
| 7.4842           | 6254.0000                                |           |
| 7.5044           | 6356.0000                                |           |
| 7.5246           | 6254.0000                                |           |
| 7.5448           | 6192.0000                                |           |
| 7.5650           | 6316.0000                                |           |
| 7.5853           | 6399.0000                                |           |
| 7.6055           | 6388.0000                                |           |
| 7.6257           | 6343.0000                                |           |
| 7.6459           | 6267.0000                                |           |
| 7.6661           | 6506.0000                                |           |
| 7.6863           | 6318.0000                                |           |
| 7.7065           | 6527.0000                                |           |
| 7.7268           | 6407.0000                                |           |
| 7.7470           | 6469.0000                                |           |
| 7.7672           | 6468.0000                                |           |

| Dec 04, 14 17:43 | Na <sub>2</sub> TeC <sub>2</sub> -xy.txt | Page 3/69 |
|------------------|------------------------------------------|-----------|
| 7.7874           | 6575.0000                                |           |
| 7.8076           | 6381.0000                                |           |
| 7.8278           | 6466.0000                                |           |
| 7.8481           | 6347.0000                                |           |
| 7.8683           | 6449.0000                                |           |
| 7.8885           | 6327.0000                                |           |
| 7.9087           | 6546.0000                                |           |
| 7.9289           | 6451.0000                                |           |
| 7.9491           | 6511.0000                                |           |
| 7.9693           | 6535.0000                                |           |
| 7.9896           | 6345.0000                                |           |
| 8.0098           | 6542.0000                                |           |
| 8.0300           | 6365.0000                                |           |
| 8.0502           | 6501.0000                                |           |
| 8.0704           | 6468.0000                                |           |
| 8.0906           | 6396.0000                                |           |
| 8.1108           | 6505.0000                                |           |
| 8.1311           | 6452.0000                                |           |
| 8.1513           | 6382.0000                                |           |
| 8.1715           | 6520.0000                                |           |
| 8.1917           | 6381.0000                                |           |
| 8.2119           | 6426.0000                                |           |
| 8.2321           | 6548.0000                                |           |
| 8.2523           | 6520.0000                                |           |
| 8.2726           | 6491.0000                                |           |
| 8.2928           | 6471.0000                                |           |
| 8.3130           | 6556.0000                                |           |
| 8.3332           | 6436.0000                                |           |
| 8.3534           | 6571.0000                                |           |
| 8.3736           | 6433.0000                                |           |
| 8.3938           | 6739.0000                                |           |
| 8.4141           | 6533.0000                                |           |
| 8.4343           | 6576.0000                                |           |
| 8.4545           | 6692.0000                                |           |
| 8.4747           | 6544.0000                                |           |
| 8.4949           | 6481.0000                                |           |
| 8.5151           | 6564.0000                                |           |
| 8.5353           | 6715.0000                                |           |
| 8.5556           | 6783.0000                                |           |
| 8.5758           | 6813.0000                                |           |
| 8.5960           | 6688.0000                                |           |
| 8.6162           | 6822.0000                                |           |
| 8.6364           | 7022.0000                                |           |
| 8.6566           | 6980.0000                                |           |
| 8.6768           | 6968.0000                                |           |
| 8.6971           | 7047.0000                                |           |
| 8.7173           | 6943.0000                                |           |
| 8.7375           | 7031.0000                                |           |
| 8.7577           | 7049.0000                                |           |
| 8.7779           | 7242.0000                                |           |
| 8.7981           | 7281.0000                                |           |
| 8.8183           | 7372.0000                                |           |
| 8.8386           | 7393.0000                                |           |
| 8.8588           | 7593.0000                                |           |
| 8.8790           | 7644.0000                                |           |
| 8.8992           | 7674.0000                                |           |
| 8.9194           | 7619.0000                                |           |
| 8.9396           | 7726.0000                                |           |
| 8.9598           | 7737.0000                                |           |
| 8.9801           | 7765.0000                                |           |
| 9.0003           | 7849.0000                                |           |
| 9.0205           | 7933.0000                                |           |
| 9.0407           | 8113.0000                                |           |
| 9.0609           | 8131.0000                                |           |
| 9.0811           | 8116.0000                                |           |
| 9.1013           | 8111.0000                                |           |
| 9.1216           | 8194.0000                                |           |
| 9.1418           | 8078.0000                                |           |
| 9.1620           | 7935.0000                                |           |

| Dec 04, 14 17:43 | Na <sub>2</sub> TeC <sub>2</sub> -xy.txt | Page 4/69 |
|------------------|------------------------------------------|-----------|
| 9.1822           | 8209.0000                                |           |
| 9.2024           | 8190.0000                                |           |
| 9.2226           | 8353.0000                                |           |
| 9.2428           | 8247.0000                                |           |
| 9.2631           | 8293.0000                                |           |
| 9.2833           | 8274.0000                                |           |
| 9.3035           | 8572.0000                                |           |
| 9.3237           | 8316.0000                                |           |
| 9.3439           | 8487.0000                                |           |
| 9.3641           | 8493.0000                                |           |
| 9.3843           | 8410.0000                                |           |
| 9.4046           | 8381.0000                                |           |
| 9.4248           | 8592.0000                                |           |
| 9.4450           | 8509.0000                                |           |
| 9.4652           | 8525.0000                                |           |
| 9.4854           | 8684.0000                                |           |
| 9.5056           | 8397.0000                                |           |
| 9.5258           | 8564.0000                                |           |
| 9.5461           | 8671.0000                                |           |
| 9.5663           | 8671.0000                                |           |
| 9.5865           | 8545.0000                                |           |
| 9.6067           | 8817.0000                                |           |
| 9.6269           | 8763.0000                                |           |
| 9.6471           | 8871.0000                                |           |
| 9.6673           | 8633.0000                                |           |
| 9.6876           | 8805.0000                                |           |
| 9.7078           | 8668.0000                                |           |
| 9.7280           | 8764.0000                                |           |
| 9.7482           | 8789.0000                                |           |
| 9.7684           | 8951.0000                                |           |
| 9.7886           | 8886.0000                                |           |
| 9.8088           | 8902.0000                                |           |
| 9.8291           | 8921.0000                                |           |
| 9.8493           | 8840.0000                                |           |
| 9.8695           | 8815.0000                                |           |
| 9.8897           | 8795.0000                                |           |
| 9.9099           | 8941.0000                                |           |
| 9.9301           | 8885.0000                                |           |
| 9.9503           | 8824.0000                                |           |
| 9.9706           | 8928.0000                                |           |
| 9.9908           | 8862.0000                                |           |
| 10.0110          | 8903.0000                                |           |
| 10.0312          | 8744.0000                                |           |
| 10.0514          | 9121.0000                                |           |
| 10.0716          | 8976.0000                                |           |
| 10.0918          | 8836.0000                                |           |
| 10.1121          | 8788.0000                                |           |
| 10.1323          | 9105.0000                                |           |
| 10.1525          | 8959.0000                                |           |
| 10.1727          | 8785.0000                                |           |
| 10.1929          | 8756.0000                                |           |
| 10.2131          | 8888.0000                                |           |
| 10.2333          | 8828.0000                                |           |
| 10.2536          | 8696.0000                                |           |
| 10.2738          | 8975.0000                                |           |
| 10.2940          | 8748.0000                                |           |
| 10.3142          | 8826.0000                                |           |
| 10.3344          | 8672.0000                                |           |
| 10.3546          | 8762.0000                                |           |
| 10.3749          | 8654.0000                                |           |
| 10.3951          | 8573.0000                                |           |
| 10.4153          | 8548.0000                                |           |
| 10.4355          | 8388.0000                                |           |
| 10.4557          | 8353.0000                                |           |
| 10.4759          | 8427.0000                                |           |
| 10.4961          | 8406.0000                                |           |
| 10.5164          | 8283.0000                                |           |
| 10.5366          | 8329.0000                                |           |
| 10.5568          | 8119.0000                                |           |

| Dec 04, 14 17:43 | Na <sub>2</sub> TeC <sub>2</sub> -xy.txt | Page 5/69 |
|------------------|------------------------------------------|-----------|
| 10.5770          | 8055.0000                                |           |
| 10.5972          | 8043.0000                                |           |
| 10.6174          | 8023.0000                                |           |
| 10.6376          | 8031.0000                                |           |
| 10.6579          | 7792.0000                                |           |
| 10.6781          | 7908.0000                                |           |
| 10.6983          | 7787.0000                                |           |
| 10.7185          | 7734.0000                                |           |
| 10.7387          | 7720.0000                                |           |
| 10.7589          | 7633.0000                                |           |
| 10.7791          | 7352.0000                                |           |
| 10.7994          | 7542.0000                                |           |
| 10.8196          | 7544.0000                                |           |
| 10.8398          | 7408.0000                                |           |
| 10.8600          | 7220.0000                                |           |
| 10.8802          | 7108.0000                                |           |
| 10.9004          | 7332.0000                                |           |
| 10.9206          | 7258.0000                                |           |
| 10.9409          | 7058.0000                                |           |
| 10.9611          | 7115.0000                                |           |
| 10.9813          | 7036.0000                                |           |
| 11.0015          | 6941.0000                                |           |
| 11.0217          | 6963.0000                                |           |
| 11.0419          | 7033.0000                                |           |
| 11.0621          | 6805.0000                                |           |
| 11.0824          | 6797.0000                                |           |
| 11.1026          | 6658.0000                                |           |
| 11.1228          | 6815.0000                                |           |
| 11.1430          | 6539.0000                                |           |
| 11.1632          | 6535.0000                                |           |
| 11.1834          | 6778.0000                                |           |
| 11.2036          | 6657.0000                                |           |
| 11.2239          | 6734.0000                                |           |
| 11.2441          | 6396.0000                                |           |
| 11.2643          | 6472.0000                                |           |
| 11.2845          | 6409.0000                                |           |
| 11.3047          | 6378.0000                                |           |
| 11.3249          | 6314.0000                                |           |
| 11.3451          | 6210.0000                                |           |
| 11.3654          | 6340.0000                                |           |
| 11.3856          | 6110.0000                                |           |
| 11.4058          | 6127.0000                                |           |
| 11.4260          | 6184.0000                                |           |
| 11.4462          | 6031.0000                                |           |
| 11.4664          | 6174.0000                                |           |
| 11.4866          | 6053.0000                                |           |
| 11.5069          | 6200.0000                                |           |
| 11.5271          | 6112.0000                                |           |
| 11.5473          | 6019.0000                                |           |
| 11.5675          | 5867.0000                                |           |
| 11.5877          | 5942.0000                                |           |
| 11.6079          | 5900.0000                                |           |
| 11.6281          | 5986.0000                                |           |
| 11.6484          | 5737.0000                                |           |
| 11.6686          | 5869.0000                                |           |
| 11.6888          | 5815.0000                                |           |
| 11.7090          | 5749.0000                                |           |
| 11.7292          | 5779.0000                                |           |
| 11.7494          | 5641.0000                                |           |
| 11.7696          | 5677.0000                                |           |
| 11.7899          | 5756.0000                                |           |
| 11.8101          | 5702.0000                                |           |
| 11.8303          | 5654.0000                                |           |
| 11.8505          | 5775.0000                                |           |
| 11.8707          | 5629.0000                                |           |
| 11.8909          | 5795.0000                                |           |
| 11.9111          | 5565.0000                                |           |
| 11.9314          | 5583.0000                                |           |
| 11.9516          | 5642.0000                                |           |

| Dec 04, 14 17:43 | Na <sub>2</sub> TeC <sub>2</sub> -xy.txt | Page 6/69 |
|------------------|------------------------------------------|-----------|
| 11.9718          | 5530.0000                                |           |
| 11.9920          | 5361.0000                                |           |
| 12.0122          | 5572.0000                                |           |
| 12.0324          | 5505.0000                                |           |
| 12.0526          | 5511.0000                                |           |
| 12.0729          | 5476.0000                                |           |
| 12.0931          | 5432.0000                                |           |
| 12.1133          | 5323.0000                                |           |
| 12.1335          | 5415.0000                                |           |
| 12.1537          | 5360.0000                                |           |
| 12.1739          | 5136.0000                                |           |
| 12.1941          | 5309.0000                                |           |
| 12.2144          | 5247.0000                                |           |
| 12.2346          | 5257.0000                                |           |
| 12.2548          | 5317.0000                                |           |
| 12.2750          | 5366.0000                                |           |
| 12.2952          | 5262.0000                                |           |
| 12.3154          | 5285.0000                                |           |
| 12.3356          | 5282.0000                                |           |
| 12.3559          | 5281.0000                                |           |
| 12.3761          | 5232.0000                                |           |
| 12.3963          | 5308.0000                                |           |
| 12.4165          | 5165.0000                                |           |
| 12.4367          | 5106.0000                                |           |
| 12.4569          | 5214.0000                                |           |
| 12.4771          | 5093.0000                                |           |
| 12.4974          | 5279.0000                                |           |
| 12.5176          | 5116.0000                                |           |
| 12.5378          | 5173.0000                                |           |
| 12.5580          | 5253.0000                                |           |
| 12.5782          | 5125.0000                                |           |
| 12.5984          | 5268.0000                                |           |
| 12.6186          | 5237.0000                                |           |
| 12.6389          | 5172.0000                                |           |
| 12.6591          | 5169.0000                                |           |
| 12.6793          | 5020.0000                                |           |
| 12.6995          | 5116.0000                                |           |
| 12.7197          | 5084.0000                                |           |
| 12.7399          | 5220.0000                                |           |
| 12.7601          | 5102.0000                                |           |
| 12.7804          | 5257.0000                                |           |
| 12.8006          | 5277.0000                                |           |
| 12.8208          | 5371.0000                                |           |
| 12.8410          | 5307.0000                                |           |
| 12.8612          | 5319.0000                                |           |
| 12.8814          | 5453.0000                                |           |
| 12.9017          | 5357.0000                                |           |
| 12.9219          | 5463.0000                                |           |
| 12.9421          | 5366.0000                                |           |
| 12.9623          | 5609.0000                                |           |
| 12.9825          | 5614.0000                                |           |
| 13.0027          | 5638.0000                                |           |
| 13.0229          | 5607.0000                                |           |
| 13.0432          | 5612.0000                                |           |
| 13.0634          | 5673.0000                                |           |
| 13.0836          | 5374.0000                                |           |
| 13.1038          | 5485.0000                                |           |
| 13.1240          | 5443.0000                                |           |
| 13.1442          | 5284.0000                                |           |
| 13.1644          | 5119.0000                                |           |
| 13.1847          | 5072.0000                                |           |
| 13.2049          | 5108.0000                                |           |
| 13.2251          | 5091.0000                                |           |
| 13.2453          | 4843.0000                                |           |
| 13.2655          | 4843.0000                                |           |
| 13.2857          | 4984.0000                                |           |
| 13.3059          | 4769.0000                                |           |
| 13.3262          | 4651.0000                                |           |
| 13.3464          | 4687.0000                                |           |

| Dec 04, 14 17:43 | Na <sub>2</sub> TeC <sub>2</sub> -xy.txt | Page 7/69 |
|------------------|------------------------------------------|-----------|
| 13.3666          | 4580.0000                                |           |
| 13.3868          | 4508.0000                                |           |
| 13.4070          | 4679.0000                                |           |
| 13.4272          | 4476.0000                                |           |
| 13.4474          | 4366.0000                                |           |
| 13.4677          | 4634.0000                                |           |
| 13.4879          | 4588.0000                                |           |
| 13.5081          | 4432.0000                                |           |
| 13.5283          | 4440.0000                                |           |
| 13.5485          | 4510.0000                                |           |
| 13.5687          | 4558.0000                                |           |
| 13.5889          | 4481.0000                                |           |
| 13.6092          | 4377.0000                                |           |
| 13.6294          | 4315.0000                                |           |
| 13.6496          | 4343.0000                                |           |
| 13.6698          | 4321.0000                                |           |
| 13.6900          | 4288.0000                                |           |
| 13.7102          | 4413.0000                                |           |
| 13.7304          | 4261.0000                                |           |
| 13.7507          | 4337.0000                                |           |
| 13.7709          | 4297.0000                                |           |
| 13.7911          | 4340.0000                                |           |
| 13.8113          | 4282.0000                                |           |
| 13.8315          | 4322.0000                                |           |
| 13.8517          | 4273.0000                                |           |
| 13.8719          | 4239.0000                                |           |
| 13.8922          | 4384.0000                                |           |
| 13.9124          | 4147.0000                                |           |
| 13.9326          | 4152.0000                                |           |
| 13.9528          | 4219.0000                                |           |
| 13.9730          | 4165.0000                                |           |
| 13.9932          | 4301.0000                                |           |
| 14.0134          | 4155.0000                                |           |
| 14.0337          | 4193.0000                                |           |
| 14.0539          | 4221.0000                                |           |
| 14.0741          | 4082.0000                                |           |
| 14.0943          | 4304.0000                                |           |
| 14.1145          | 4197.0000                                |           |
| 14.1347          | 4116.0000                                |           |
| 14.1549          | 4236.0000                                |           |
| 14.1752          | 4027.0000                                |           |
| 14.1954          | 4092.0000                                |           |
| 14.2156          | 4135.0000                                |           |
| 14.2358          | 4042.0000                                |           |
| 14.2560          | 4074.0000                                |           |
| 14.2762          | 4085.0000                                |           |
| 14.2964          | 4316.0000                                |           |
| 14.3167          | 4073.0000                                |           |
| 14.3369          | 3969.0000                                |           |
| 14.3571          | 4022.0000                                |           |
| 14.3773          | 4148.0000                                |           |
| 14.3975          | 4123.0000                                |           |
| 14.4177          | 4080.0000                                |           |
| 14.4379          | 4063.0000                                |           |
| 14.4582          | 4049.0000                                |           |
| 14.4784          | 4098.0000                                |           |
| 14.4986          | 4036.0000                                |           |
| 14.5188          | 4137.0000                                |           |
| 14.5390          | 4080.0000                                |           |
| 14.5592          | 3975.0000                                |           |
| 14.5794          | 3986.0000                                |           |
| 14.5997          | 4020.0000                                |           |
| 14.6199          | 4012.0000                                |           |
| 14.6401          | 4102.0000                                |           |
| 14.6603          | 3960.0000                                |           |
| 14.6805          | 3899.0000                                |           |
| 14.7007          | 4072.0000                                |           |
| 14.7209          | 4092.0000                                |           |
| 14.7412          | 4114.0000                                |           |

| Dec 04, 14 17:43 | Na <sub>2</sub> TeC <sub>2</sub> -xy.txt | Page 8/69 |
|------------------|------------------------------------------|-----------|
| 14.7614          | 3954.0000                                |           |
| 14.7816          | 4018.0000                                |           |
| 14.8018          | 4005.0000                                |           |
| 14.8220          | 3866.0000                                |           |
| 14.8422          | 3957.0000                                |           |
| 14.8624          | 4007.0000                                |           |
| 14.8827          | 4007.0000                                |           |
| 14.9029          | 3920.0000                                |           |
| 14.9231          | 3937.0000                                |           |
| 14.9433          | 3939.0000                                |           |
| 14.9635          | 3937.0000                                |           |
| 14.9837          | 3829.0000                                |           |
| 15.0039          | 4076.0000                                |           |
| 15.0242          | 3910.0000                                |           |
| 15.0444          | 3998.0000                                |           |
| 15.0646          | 3887.0000                                |           |
| 15.0848          | 3961.0000                                |           |
| 15.1050          | 3932.0000                                |           |
| 15.1252          | 3916.0000                                |           |
| 15.1454          | 3856.0000                                |           |
| 15.1657          | 4044.0000                                |           |
| 15.1859          | 3809.0000                                |           |
| 15.2061          | 3855.0000                                |           |
| 15.2263          | 3850.0000                                |           |
| 15.2465          | 3853.0000                                |           |
| 15.2667          | 3844.0000                                |           |
| 15.2869          | 3918.0000                                |           |
| 15.3072          | 3891.0000                                |           |
| 15.3274          | 3840.0000                                |           |
| 15.3476          | 3823.0000                                |           |
| 15.3678          | 3807.0000                                |           |
| 15.3880          | 3769.0000                                |           |
| 15.4082          | 3947.0000                                |           |
| 15.4285          | 3899.0000                                |           |
| 15.4487          | 3778.0000                                |           |
| 15.4689          | 3811.0000                                |           |
| 15.4891          | 3828.0000                                |           |
| 15.5093          | 3667.0000                                |           |
| 15.5295          | 3886.0000                                |           |
| 15.5497          | 3817.0000                                |           |
| 15.5700          | 3887.0000                                |           |
| 15.5902          | 3746.0000                                |           |
| 15.6104          | 3736.0000                                |           |
| 15.6306          | 3883.0000                                |           |
| 15.6508          | 3934.0000                                |           |
| 15.6710          | 3777.0000                                |           |
| 15.6912          | 3801.0000                                |           |
| 15.7115          | 3933.0000                                |           |
| 15.7317          | 3902.0000                                |           |
| 15.7519          | 3933.0000                                |           |
| 15.7721          | 3839.0000                                |           |
| 15.7923          | 3874.0000                                |           |
| 15.8125          | 3828.0000                                |           |
| 15.8327          | 3835.0000                                |           |
| 15.8530          | 3816.0000                                |           |
| 15.8732          | 3792.0000                                |           |
| 15.8934          | 3737.0000                                |           |
| 15.9136          | 3873.0000                                |           |
| 15.9338          | 3853.0000                                |           |
| 15.9540          | 3941.0000                                |           |
| 15.9742          | 3756.0000                                |           |
| 15.9945          | 3852.0000                                |           |
| 16.0147          | 3869.0000                                |           |
| 16.0349          | 3882.0000                                |           |
| 16.0551          | 3848.0000                                |           |
| 16.0753          | 3828.0000                                |           |
| 16.0955          | 3837.0000                                |           |
| 16.1157          | 3797.0000                                |           |
| 16.1360          | 3764.0000                                |           |

| Dec 04, 14 17:43 | Na2TeC2-xy.txt | Page 9/69 |
|------------------|----------------|-----------|
| 16.1562          | 3846.0000      |           |
| 16.1764          | 3793.0000      |           |
| 16.1966          | 3799.0000      |           |
| 16.2168          | 3824.0000      |           |
| 16.2370          | 3808.0000      |           |
| 16.2572          | 3791.0000      |           |
| 16.2775          | 3782.0000      |           |
| 16.2977          | 3722.0000      |           |
| 16.3179          | 3688.0000      |           |
| 16.3381          | 3765.0000      |           |
| 16.3583          | 3863.0000      |           |
| 16.3785          | 3769.0000      |           |
| 16.3987          | 3746.0000      |           |
| 16.4190          | 3787.0000      |           |
| 16.4392          | 3778.0000      |           |
| 16.4594          | 3823.0000      |           |
| 16.4796          | 3824.0000      |           |
| 16.4998          | 3907.0000      |           |
| 16.5200          | 3754.0000      |           |
| 16.5402          | 3730.0000      |           |
| 16.5605          | 3785.0000      |           |
| 16.5807          | 3787.0000      |           |
| 16.6009          | 3782.0000      |           |
| 16.6211          | 3859.0000      |           |
| 16.6413          | 3818.0000      |           |
| 16.6615          | 3885.0000      |           |
| 16.6817          | 3830.0000      |           |
| 16.7020          | 3718.0000      |           |
| 16.7222          | 3833.0000      |           |
| 16.7424          | 3712.0000      |           |
| 16.7626          | 3876.0000      |           |
| 16.7828          | 3780.0000      |           |
| 16.8030          | 3657.0000      |           |
| 16.8232          | 3794.0000      |           |
| 16.8435          | 3900.0000      |           |
| 16.8637          | 3903.0000      |           |
| 16.8839          | 3844.0000      |           |
| 16.9041          | 3833.0000      |           |
| 16.9243          | 3860.0000      |           |
| 16.9445          | 3866.0000      |           |
| 16.9647          | 3868.0000      |           |
| 16.9850          | 3840.0000      |           |
| 17.0052          | 3890.0000      |           |
| 17.0254          | 3931.0000      |           |
| 17.0456          | 3952.0000      |           |
| 17.0658          | 3941.0000      |           |
| 17.0860          | 3753.0000      |           |
| 17.1062          | 3777.0000      |           |
| 17.1265          | 3816.0000      |           |
| 17.1467          | 3852.0000      |           |
| 17.1669          | 3874.0000      |           |
| 17.1871          | 3904.0000      |           |
| 17.2073          | 4010.0000      |           |
| 17.2275          | 3910.0000      |           |
| 17.2477          | 3910.0000      |           |
| 17.2680          | 3785.0000      |           |
| 17.2882          | 3964.0000      |           |
| 17.3084          | 3898.0000      |           |
| 17.3286          | 3869.0000      |           |
| 17.3488          | 3924.0000      |           |
| 17.3690          | 3861.0000      |           |
| 17.3892          | 3838.0000      |           |
| 17.4095          | 4031.0000      |           |
| 17.4297          | 3908.0000      |           |
| 17.4499          | 3918.0000      |           |
| 17.4701          | 3811.0000      |           |
| 17.4903          | 3919.0000      |           |
| 17.5105          | 3912.0000      |           |
| 17.5307          | 3900.0000      |           |

| Dec 04, 14 17:43 | Na2TeC2-xy.txt | Page 10/69 |
|------------------|----------------|------------|
| 17.5510          | 3941.0000      |            |
| 17.5712          | 3895.0000      |            |
| 17.5914          | 3832.0000      |            |
| 17.6116          | 3862.0000      |            |
| 17.6318          | 3785.0000      |            |
| 17.6520          | 4089.0000      |            |
| 17.6722          | 3929.0000      |            |
| 17.6925          | 3977.0000      |            |
| 17.7127          | 4046.0000      |            |
| 17.7329          | 4065.0000      |            |
| 17.7531          | 3967.0000      |            |
| 17.7733          | 3948.0000      |            |
| 17.7935          | 3958.0000      |            |
| 17.8137          | 3909.0000      |            |
| 17.8340          | 4069.0000      |            |
| 17.8542          | 4067.0000      |            |
| 17.8744          | 3992.0000      |            |
| 17.8946          | 4068.0000      |            |
| 17.9148          | 3996.0000      |            |
| 17.9350          | 3936.0000      |            |
| 17.9553          | 3932.0000      |            |
| 17.9755          | 3936.0000      |            |
| 17.9957          | 4087.0000      |            |
| 18.0159          | 3966.0000      |            |
| 18.0361          | 4026.0000      |            |
| 18.0563          | 4139.0000      |            |
| 18.0765          | 3951.0000      |            |
| 18.0968          | 4001.0000      |            |
| 18.1170          | 4143.0000      |            |
| 18.1372          | 4130.0000      |            |
| 18.1574          | 4048.0000      |            |
| 18.1776          | 4164.0000      |            |
| 18.1978          | 4030.0000      |            |
| 18.2180          | 4144.0000      |            |
| 18.2383          | 3979.0000      |            |
| 18.2585          | 4102.0000      |            |
| 18.2787          | 4127.0000      |            |
| 18.2989          | 4089.0000      |            |
| 18.3191          | 4048.0000      |            |
| 18.3393          | 4155.0000      |            |
| 18.3595          | 4169.0000      |            |
| 18.3798          | 4061.0000      |            |
| 18.4000          | 3995.0000      |            |
| 18.4202          | 4209.0000      |            |
| 18.4404          | 4145.0000      |            |
| 18.4606          | 4189.0000      |            |
| 18.4808          | 4288.0000      |            |
| 18.5010          | 4209.0000      |            |
| 18.5213          | 4251.0000      |            |
| 18.5415          | 4136.0000      |            |
| 18.5617          | 4156.0000      |            |
| 18.5819          | 4284.0000      |            |
| 18.6021          | 4251.0000      |            |
| 18.6223          | 4386.0000      |            |
| 18.6425          | 4313.0000      |            |
| 18.6628          | 4383.0000      |            |
| 18.6830          | 4197.0000      |            |
| 18.7032          | 4295.0000      |            |
| 18.7234          | 4275.0000      |            |
| 18.7436          | 4279.0000      |            |
| 18.7638          | 4283.0000      |            |
| 18.7840          | 4284.0000      |            |
| 18.8043          | 4343.0000      |            |
| 18.8245          | 4366.0000      |            |
| 18.8447          | 4257.0000      |            |
| 18.8649          | 4175.0000      |            |
| 18.8851          | 4231.0000      |            |
| 18.9053          | 4197.0000      |            |
| 18.9255          | 4434.0000      |            |

| Dec 04, 14 17:43 | Na2TeC2-xy.txt | Page 11/69 |
|------------------|----------------|------------|
| 18.9458          | 4392.0000      |            |
| 18.9660          | 4253.0000      |            |
| 18.9862          | 4410.0000      |            |
| 19.0064          | 4385.0000      |            |
| 19.0266          | 4332.0000      |            |
| 19.0468          | 4399.0000      |            |
| 19.0670          | 4409.0000      |            |
| 19.0873          | 4361.0000      |            |
| 19.1075          | 4429.0000      |            |
| 19.1277          | 4253.0000      |            |
| 19.1479          | 4355.0000      |            |
| 19.1681          | 4415.0000      |            |
| 19.1883          | 4400.0000      |            |
| 19.2085          | 4491.0000      |            |
| 19.2288          | 4263.0000      |            |
| 19.2490          | 4438.0000      |            |
| 19.2692          | 4527.0000      |            |
| 19.2894          | 4405.0000      |            |
| 19.3096          | 4458.0000      |            |
| 19.3298          | 4511.0000      |            |
| 19.3500          | 4516.0000      |            |
| 19.3703          | 4461.0000      |            |
| 19.3905          | 4488.0000      |            |
| 19.4107          | 4481.0000      |            |
| 19.4309          | 4484.0000      |            |
| 19.4511          | 4456.0000      |            |
| 19.4713          | 4490.0000      |            |
| 19.4915          | 4529.0000      |            |
| 19.5118          | 4470.0000      |            |
| 19.5320          | 4548.0000      |            |
| 19.5522          | 4573.0000      |            |
| 19.5724          | 4547.0000      |            |
| 19.5926          | 4563.0000      |            |
| 19.6128          | 4611.0000      |            |
| 19.6330          | 4455.0000      |            |
| 19.6533          | 4584.0000      |            |
| 19.6735          | 4523.0000      |            |
| 19.6937          | 4477.0000      |            |
| 19.7139          | 4490.0000      |            |
| 19.7341          | 4602.0000      |            |
| 19.7543          | 4565.0000      |            |
| 19.7745          | 4526.0000      |            |
| 19.7948          | 4696.0000      |            |
| 19.8150          | 4497.0000      |            |
| 19.8352          | 4551.0000      |            |
| 19.8554          | 4531.0000      |            |
| 19.8756          | 4594.0000      |            |
| 19.8958          | 4592.0000      |            |
| 19.9160          | 4689.0000      |            |
| 19.9363          | 4498.0000      |            |
| 19.9565          | 4681.0000      |            |
| 19.9767          | 4707.0000      |            |
| 19.9969          | 4668.0000      |            |
| 20.0171          | 4710.0000      |            |
| 20.0373          | 4486.0000      |            |
| 20.0575          | 4708.0000      |            |
| 20.0778          | 4683.0000      |            |
| 20.0980          | 4759.0000      |            |
| 20.1182          | 4722.0000      |            |
| 20.1384          | 4734.0000      |            |
| 20.1586          | 4630.0000      |            |
| 20.1788          | 4797.0000      |            |
| 20.1990          | 4798.0000      |            |
| 20.2193          | 4748.0000      |            |
| 20.2395          | 4692.0000      |            |
| 20.2597          | 4648.0000      |            |
| 20.2799          | 4846.0000      |            |
| 20.3001          | 4807.0000      |            |
| 20.3203          | 4673.0000      |            |

| Dec 04, 14 17:43 | Na2TeC2-xy.txt | Page 12/69 |
|------------------|----------------|------------|
| 20.3405          | 4682.0000      |            |
| 20.3608          | 4664.0000      |            |
| 20.3810          | 4780.0000      |            |
| 20.4012          | 4733.0000      |            |
| 20.4214          | 4789.0000      |            |
| 20.4416          | 4806.0000      |            |
| 20.4618          | 4778.0000      |            |
| 20.4821          | 4883.0000      |            |
| 20.5023          | 4847.0000      |            |
| 20.5225          | 4764.0000      |            |
| 20.5427          | 4790.0000      |            |
| 20.5629          | 4861.0000      |            |
| 20.5831          | 4916.0000      |            |
| 20.6033          | 4850.0000      |            |
| 20.6236          | 4915.0000      |            |
| 20.6438          | 4730.0000      |            |
| 20.6640          | 4867.0000      |            |
| 20.6842          | 5077.0000      |            |
| 20.7044          | 5055.0000      |            |
| 20.7246          | 4923.0000      |            |
| 20.7448          | 4985.0000      |            |
| 20.7651          | 5068.0000      |            |
| 20.7853          | 4969.0000      |            |
| 20.8055          | 4933.0000      |            |
| 20.8257          | 5022.0000      |            |
| 20.8459          | 5041.0000      |            |
| 20.8661          | 5030.0000      |            |
| 20.8863          | 5106.0000      |            |
| 20.9066          | 5038.0000      |            |
| 20.9268          | 5163.0000      |            |
| 20.9470          | 5173.0000      |            |
| 20.9672          | 5134.0000      |            |
| 20.9874          | 5118.0000      |            |
| 21.0076          | 5180.0000      |            |
| 21.0278          | 5301.0000      |            |
| 21.0481          | 5236.0000      |            |
| 21.0683          | 5295.0000      |            |
| 21.0885          | 5402.0000      |            |
| 21.1087          | 5471.0000      |            |
| 21.1289          | 5524.0000      |            |
| 21.1491          | 5618.0000      |            |
| 21.1693          | 5743.0000      |            |
| 21.1896          | 5708.0000      |            |
| 21.2098          | 5919.0000      |            |
| 21.2300          | 6010.0000      |            |
| 21.2502          | 6425.0000      |            |
| 21.2704          | 6443.0000      |            |
| 21.2906          | 6686.0000      |            |
| 21.3108          | 7004.0000      |            |
| 21.3311          | 7036.0000      |            |
| 21.3513          | 7609.0000      |            |
| 21.3715          | 7690.0000      |            |
| 21.3917          | 7712.0000      |            |
| 21.4119          | 7709.0000      |            |
| 21.4321          | 7567.0000      |            |
| 21.4523          | 7563.0000      |            |
| 21.4726          | 7230.0000      |            |
| 21.4928          | 6855.0000      |            |
| 21.5130          | 6826.0000      |            |
| 21.5332          | 6613.0000      |            |
| 21.5534          | 6311.0000      |            |
| 21.5736          | 5853.0000      |            |
| 21.5938          | 5899.0000      |            |
| 21.6141          | 5631.0000      |            |
| 21.6343          | 5416.0000      |            |
| 21.6545          | 5410.0000      |            |
| 21.6747          | 5520.0000      |            |
| 21.6949          | 5128.0000      |            |
| 21.7151          | 5216.0000      |            |

| Dec 04, 14 17:43 | Na2TeC2-xy.txt | Page 13/69 |
|------------------|----------------|------------|
| 21.7353          | 5206.0000      |            |
| 21.7556          | 5232.0000      |            |
| 21.7758          | 5053.0000      |            |
| 21.7960          | 5000.0000      |            |
| 21.8162          | 4933.0000      |            |
| 21.8364          | 4953.0000      |            |
| 21.8566          | 4853.0000      |            |
| 21.8768          | 5031.0000      |            |
| 21.8971          | 4782.0000      |            |
| 21.9173          | 4790.0000      |            |
| 21.9375          | 4864.0000      |            |
| 21.9577          | 4825.0000      |            |
| 21.9779          | 4806.0000      |            |
| 21.9981          | 4714.0000      |            |
| 22.0183          | 4809.0000      |            |
| 22.0386          | 4749.0000      |            |
| 22.0588          | 4844.0000      |            |
| 22.0790          | 4803.0000      |            |
| 22.0992          | 4907.0000      |            |
| 22.1194          | 4697.0000      |            |
| 22.1396          | 4629.0000      |            |
| 22.1598          | 4644.0000      |            |
| 22.1801          | 4970.0000      |            |
| 22.2003          | 4697.0000      |            |
| 22.2205          | 4645.0000      |            |
| 22.2407          | 4713.0000      |            |
| 22.2609          | 4606.0000      |            |
| 22.2811          | 4809.0000      |            |
| 22.3013          | 4604.0000      |            |
| 22.3216          | 4724.0000      |            |
| 22.3418          | 4680.0000      |            |
| 22.3620          | 4575.0000      |            |
| 22.3822          | 4637.0000      |            |
| 22.4024          | 4812.0000      |            |
| 22.4226          | 4514.0000      |            |
| 22.4428          | 4547.0000      |            |
| 22.4631          | 4495.0000      |            |
| 22.4833          | 4536.0000      |            |
| 22.5035          | 4565.0000      |            |
| 22.5237          | 4450.0000      |            |
| 22.5439          | 4450.0000      |            |
| 22.5641          | 4543.0000      |            |
| 22.5843          | 4563.0000      |            |
| 22.6046          | 4398.0000      |            |
| 22.6248          | 4624.0000      |            |
| 22.6450          | 4446.0000      |            |
| 22.6652          | 4303.0000      |            |
| 22.6854          | 4315.0000      |            |
| 22.7056          | 4461.0000      |            |
| 22.7258          | 4520.0000      |            |
| 22.7461          | 4434.0000      |            |
| 22.7663          | 4400.0000      |            |
| 22.7865          | 4353.0000      |            |
| 22.8067          | 4401.0000      |            |
| 22.8269          | 4274.0000      |            |
| 22.8471          | 4402.0000      |            |
| 22.8673          | 4282.0000      |            |
| 22.8876          | 4278.0000      |            |
| 22.9078          | 4377.0000      |            |
| 22.9280          | 4328.0000      |            |
| 22.9482          | 4383.0000      |            |
| 22.9684          | 4504.0000      |            |
| 22.9886          | 4236.0000      |            |
| 23.0089          | 4237.0000      |            |
| 23.0291          | 4295.0000      |            |
| 23.0493          | 4188.0000      |            |
| 23.0695          | 4239.0000      |            |
| 23.0897          | 4165.0000      |            |
| 23.1099          | 4137.0000      |            |

| Dec 04, 14 17:43 | Na2TeC2-xy.txt | Page 14/69 |
|------------------|----------------|------------|
| 23.1301          | 4279.0000      |            |
| 23.1504          | 4197.0000      |            |
| 23.1706          | 4268.0000      |            |
| 23.1908          | 4376.0000      |            |
| 23.2110          | 4294.0000      |            |
| 23.2312          | 4168.0000      |            |
| 23.2514          | 4157.0000      |            |
| 23.2716          | 4242.0000      |            |
| 23.2919          | 4206.0000      |            |
| 23.3121          | 4224.0000      |            |
| 23.3323          | 4238.0000      |            |
| 23.3525          | 4187.0000      |            |
| 23.3727          | 4142.0000      |            |
| 23.3929          | 4255.0000      |            |
| 23.4131          | 4103.0000      |            |
| 23.4334          | 4099.0000      |            |
| 23.4536          | 4038.0000      |            |
| 23.4738          | 4079.0000      |            |
| 23.4940          | 4057.0000      |            |
| 23.5142          | 4029.0000      |            |
| 23.5344          | 4057.0000      |            |
| 23.5546          | 4016.0000      |            |
| 23.5749          | 3977.0000      |            |
| 23.5951          | 4094.0000      |            |
| 23.6153          | 3910.0000      |            |
| 23.6355          | 3951.0000      |            |
| 23.6557          | 3904.0000      |            |
| 23.6759          | 3902.0000      |            |
| 23.6961          | 3725.0000      |            |
| 23.7164          | 3844.0000      |            |
| 23.7366          | 3847.0000      |            |
| 23.7568          | 3827.0000      |            |
| 23.7770          | 3812.0000      |            |
| 23.7972          | 3925.0000      |            |
| 23.8174          | 3715.0000      |            |
| 23.8376          | 3758.0000      |            |
| 23.8579          | 3804.0000      |            |
| 23.8781          | 3708.0000      |            |
| 23.8983          | 3772.0000      |            |
| 23.9185          | 3766.0000      |            |
| 23.9387          | 3668.0000      |            |
| 23.9589          | 3678.0000      |            |
| 23.9791          | 3689.0000      |            |
| 23.9994          | 3700.0000      |            |
| 24.0196          | 3635.0000      |            |
| 24.0398          | 3638.0000      |            |
| 24.0600          | 3602.0000      |            |
| 24.0802          | 3705.0000      |            |
| 24.1004          | 3655.0000      |            |
| 24.1206          | 3509.0000      |            |
| 24.1409          | 3589.0000      |            |
| 24.1611          | 3515.0000      |            |
| 24.1813          | 3566.0000      |            |
| 24.2015          | 3609.0000      |            |
| 24.2217          | 3570.0000      |            |
| 24.2419          | 3436.0000      |            |
| 24.2621          | 3533.0000      |            |
| 24.2824          | 3560.0000      |            |
| 24.3026          | 3417.0000      |            |
| 24.3228          | 3457.0000      |            |
| 24.3430          | 3521.0000      |            |
| 24.3632          | 3429.0000      |            |
| 24.3834          | 3467.0000      |            |
| 24.4036          | 3445.0000      |            |
| 24.4239          | 3438.0000      |            |
| 24.4441          | 3420.0000      |            |
| 24.4643          | 3324.0000      |            |
| 24.4845          | 3328.0000      |            |
| 24.5047          | 3391.0000      |            |

| Dec 04, 14 17:43 | Na2TeC2-xy.txt | Page 15/69 |
|------------------|----------------|------------|
| 24.5249          | 3392.0000      |            |
| 24.5451          | 3309.0000      |            |
| 24.5654          | 3242.0000      |            |
| 24.5856          | 3285.0000      |            |
| 24.6058          | 3314.0000      |            |
| 24.6260          | 3353.0000      |            |
| 24.6462          | 3192.0000      |            |
| 24.6664          | 3262.0000      |            |
| 24.6866          | 3199.0000      |            |
| 24.7069          | 3253.0000      |            |
| 24.7271          | 3283.0000      |            |
| 24.7473          | 3267.0000      |            |
| 24.7675          | 3184.0000      |            |
| 24.7877          | 3189.0000      |            |
| 24.8079          | 3148.0000      |            |
| 24.8281          | 3227.0000      |            |
| 24.8484          | 3228.0000      |            |
| 24.8686          | 3174.0000      |            |
| 24.8888          | 3081.0000      |            |
| 24.9090          | 3163.0000      |            |
| 24.9292          | 3111.0000      |            |
| 24.9494          | 3054.0000      |            |
| 24.9696          | 3029.0000      |            |
| 24.9899          | 3203.0000      |            |
| 25.0101          | 3013.0000      |            |
| 25.0303          | 3035.0000      |            |
| 25.0505          | 3087.0000      |            |
| 25.0707          | 3099.0000      |            |
| 25.0909          | 3065.0000      |            |
| 25.1111          | 3002.0000      |            |
| 25.1314          | 3088.0000      |            |
| 25.1516          | 3033.0000      |            |
| 25.1718          | 2961.0000      |            |
| 25.1920          | 2996.0000      |            |
| 25.2122          | 2987.0000      |            |
| 25.2324          | 2938.0000      |            |
| 25.2526          | 3046.0000      |            |
| 25.2729          | 2923.0000      |            |
| 25.2931          | 2970.0000      |            |
| 25.3133          | 2967.0000      |            |
| 25.3335          | 2905.0000      |            |
| 25.3537          | 2907.0000      |            |
| 25.3739          | 2887.0000      |            |
| 25.3941          | 2802.0000      |            |
| 25.4144          | 2838.0000      |            |
| 25.4346          | 2932.0000      |            |
| 25.4548          | 2905.0000      |            |
| 25.4750          | 2874.0000      |            |
| 25.4952          | 2856.0000      |            |
| 25.5154          | 2815.0000      |            |
| 25.5357          | 2892.0000      |            |
| 25.5559          | 2765.0000      |            |
| 25.5761          | 2839.0000      |            |
| 25.5963          | 2945.0000      |            |
| 25.6165          | 2821.0000      |            |
| 25.6367          | 2758.0000      |            |
| 25.6569          | 2863.0000      |            |
| 25.6772          | 2817.0000      |            |
| 25.6974          | 2820.0000      |            |
| 25.7176          | 2769.0000      |            |
| 25.7378          | 2829.0000      |            |
| 25.7580          | 2803.0000      |            |
| 25.7782          | 2788.0000      |            |
| 25.7984          | 2836.0000      |            |
| 25.8187          | 2762.0000      |            |
| 25.8389          | 2841.0000      |            |
| 25.8591          | 2841.0000      |            |
| 25.8793          | 2764.0000      |            |
| 25.8995          | 2739.0000      |            |

| Dec 04, 14 17:43 | Na2TeC2-xy.txt | Page 16/69 |
|------------------|----------------|------------|
| 25.9197          | 2723.0000      |            |
| 25.9399          | 2629.0000      |            |
| 25.9602          | 2786.0000      |            |
| 25.9804          | 2715.0000      |            |
| 26.0006          | 2655.0000      |            |
| 26.0208          | 2645.0000      |            |
| 26.0410          | 2737.0000      |            |
| 26.0612          | 2777.0000      |            |
| 26.0814          | 2692.0000      |            |
| 26.1017          | 2819.0000      |            |
| 26.1219          | 2750.0000      |            |
| 26.1421          | 2864.0000      |            |
| 26.1623          | 2720.0000      |            |
| 26.1825          | 2698.0000      |            |
| 26.2027          | 2708.0000      |            |
| 26.2229          | 2821.0000      |            |
| 26.2432          | 2761.0000      |            |
| 26.2634          | 2701.0000      |            |
| 26.2836          | 2803.0000      |            |
| 26.3038          | 2678.0000      |            |
| 26.3240          | 2648.0000      |            |
| 26.3442          | 2673.0000      |            |
| 26.3644          | 2668.0000      |            |
| 26.3847          | 2689.0000      |            |
| 26.4049          | 2690.0000      |            |
| 26.4251          | 2745.0000      |            |
| 26.4453          | 2604.0000      |            |
| 26.4655          | 2695.0000      |            |
| 26.4857          | 2596.0000      |            |
| 26.5059          | 2658.0000      |            |
| 26.5262          | 2595.0000      |            |
| 26.5464          | 2649.0000      |            |
| 26.5666          | 2576.0000      |            |
| 26.5868          | 2585.0000      |            |
| 26.6070          | 2587.0000      |            |
| 26.6272          | 2640.0000      |            |
| 26.6474          | 2683.0000      |            |
| 26.6677          | 2580.0000      |            |
| 26.6879          | 2544.0000      |            |
| 26.7081          | 2496.0000      |            |
| 26.7283          | 2650.0000      |            |
| 26.7485          | 2467.0000      |            |
| 26.7687          | 2482.0000      |            |
| 26.7889          | 2529.0000      |            |
| 26.8092          | 2538.0000      |            |
| 26.8294          | 2465.0000      |            |
| 26.8496          | 2440.0000      |            |
| 26.8698          | 2511.0000      |            |
| 26.8900          | 2433.0000      |            |
| 26.9102          | 2444.0000      |            |
| 26.9304          | 2512.0000      |            |
| 26.9507          | 2445.0000      |            |
| 26.9709          | 2413.0000      |            |
| 26.9911          | 2421.0000      |            |
| 27.0113          | 2426.0000      |            |
| 27.0315          | 2437.0000      |            |
| 27.0517          | 2331.0000      |            |
| 27.0719          | 2514.0000      |            |
| 27.0922          | 2429.0000      |            |
| 27.1124          | 2381.0000      |            |
| 27.1326          | 2431.0000      |            |
| 27.1528          | 2411.0000      |            |
| 27.1730          | 2442.0000      |            |
| 27.1932          | 2380.0000      |            |
| 27.2134          | 2296.0000      |            |
| 27.2337          | 2387.0000      |            |
| 27.2539          | 2444.0000      |            |
| 27.2741          | 2366.0000      |            |
| 27.2943          | 2354.0000      |            |



| Dec 04, 14 17:43 | Na2TeC2-xy.txt | Page 17/69 |
|------------------|----------------|------------|
| 27.3145          | 2201.0000      |            |
| 27.3347          | 2374.0000      |            |
| 27.3549          | 2360.0000      |            |
| 27.3752          | 2304.0000      |            |
| 27.3954          | 2342.0000      |            |
| 27.4156          | 2367.0000      |            |
| 27.4358          | 2329.0000      |            |
| 27.4560          | 2367.0000      |            |
| 27.4762          | 2381.0000      |            |
| 27.4964          | 2331.0000      |            |
| 27.5167          | 2311.0000      |            |
| 27.5369          | 2333.0000      |            |
| 27.5571          | 2430.0000      |            |
| 27.5773          | 2341.0000      |            |
| 27.5975          | 2332.0000      |            |
| 27.6177          | 2369.0000      |            |
| 27.6379          | 2273.0000      |            |
| 27.6582          | 2340.0000      |            |
| 27.6784          | 2295.0000      |            |
| 27.6986          | 2315.0000      |            |
| 27.7188          | 2235.0000      |            |
| 27.7390          | 2358.0000      |            |
| 27.7592          | 2258.0000      |            |
| 27.7794          | 2304.0000      |            |
| 27.7997          | 2203.0000      |            |
| 27.8199          | 2379.0000      |            |
| 27.8401          | 2207.0000      |            |
| 27.8603          | 2279.0000      |            |
| 27.8805          | 2251.0000      |            |
| 27.9007          | 2239.0000      |            |
| 27.9209          | 2249.0000      |            |
| 27.9412          | 2271.0000      |            |
| 27.9614          | 2282.0000      |            |
| 27.9816          | 2296.0000      |            |
| 28.0018          | 2321.0000      |            |
| 28.0220          | 2269.0000      |            |
| 28.0422          | 2392.0000      |            |
| 28.0625          | 2281.0000      |            |
| 28.0827          | 2346.0000      |            |
| 28.1029          | 2331.0000      |            |
| 28.1231          | 2204.0000      |            |
| 28.1433          | 2182.0000      |            |
| 28.1635          | 2312.0000      |            |
| 28.1837          | 2221.0000      |            |
| 28.2040          | 2250.0000      |            |
| 28.2242          | 2246.0000      |            |
| 28.2444          | 2175.0000      |            |
| 28.2646          | 2315.0000      |            |
| 28.2848          | 2194.0000      |            |
| 28.3050          | 2135.0000      |            |
| 28.3252          | 2297.0000      |            |
| 28.3455          | 2226.0000      |            |
| 28.3657          | 2191.0000      |            |
| 28.3859          | 2177.0000      |            |
| 28.4061          | 2202.0000      |            |
| 28.4263          | 2292.0000      |            |
| 28.4465          | 2183.0000      |            |
| 28.4667          | 2201.0000      |            |
| 28.4870          | 2173.0000      |            |
| 28.5072          | 2249.0000      |            |
| 28.5274          | 2299.0000      |            |
| 28.5476          | 2112.0000      |            |
| 28.5678          | 2164.0000      |            |
| 28.5880          | 2104.0000      |            |
| 28.6082          | 2182.0000      |            |
| 28.6285          | 2212.0000      |            |
| 28.6487          | 2186.0000      |            |
| 28.6689          | 2259.0000      |            |
| 28.6891          | 2222.0000      |            |

| Dec 04, 14 17:43 | Na2TeC2-xy.txt | Page 18/69 |
|------------------|----------------|------------|
| 28.7093          | 2219.0000      |            |
| 28.7295          | 2140.0000      |            |
| 28.7497          | 2227.0000      |            |
| 28.7700          | 2243.0000      |            |
| 28.7902          | 2239.0000      |            |
| 28.8104          | 2233.0000      |            |
| 28.8306          | 2207.0000      |            |
| 28.8508          | 2206.0000      |            |
| 28.8710          | 2197.0000      |            |
| 28.8912          | 2191.0000      |            |
| 28.9115          | 2221.0000      |            |
| 28.9317          | 2196.0000      |            |
| 28.9519          | 2326.0000      |            |
| 28.9721          | 2290.0000      |            |
| 28.9923          | 2184.0000      |            |
| 29.0125          | 2256.0000      |            |
| 29.0327          | 2183.0000      |            |
| 29.0530          | 2244.0000      |            |
| 29.0732          | 2192.0000      |            |
| 29.0934          | 2223.0000      |            |
| 29.1136          | 2258.0000      |            |
| 29.1338          | 2246.0000      |            |
| 29.1540          | 2232.0000      |            |
| 29.1742          | 2258.0000      |            |
| 29.1945          | 2320.0000      |            |
| 29.2147          | 2324.0000      |            |
| 29.2349          | 2186.0000      |            |
| 29.2551          | 2297.0000      |            |
| 29.2753          | 2184.0000      |            |
| 29.2955          | 2281.0000      |            |
| 29.3157          | 2258.0000      |            |
| 29.3360          | 2274.0000      |            |
| 29.3562          | 2270.0000      |            |
| 29.3764          | 2241.0000      |            |
| 29.3966          | 2376.0000      |            |
| 29.4168          | 2233.0000      |            |
| 29.4370          | 2325.0000      |            |
| 29.4572          | 2307.0000      |            |
| 29.4775          | 2346.0000      |            |
| 29.4977          | 2230.0000      |            |
| 29.5179          | 2320.0000      |            |
| 29.5381          | 2264.0000      |            |
| 29.5583          | 2320.0000      |            |
| 29.5785          | 2334.0000      |            |
| 29.5987          | 2340.0000      |            |
| 29.6190          | 2308.0000      |            |
| 29.6392          | 2311.0000      |            |
| 29.6594          | 2420.0000      |            |
| 29.6796          | 2360.0000      |            |
| 29.6998          | 2366.0000      |            |
| 29.7200          | 2471.0000      |            |
| 29.7402          | 2365.0000      |            |
| 29.7605          | 2409.0000      |            |
| 29.7807          | 2484.0000      |            |
| 29.8009          | 2431.0000      |            |
| 29.8211          | 2515.0000      |            |
| 29.8413          | 2383.0000      |            |
| 29.8615          | 2503.0000      |            |
| 29.8817          | 2592.0000      |            |
| 29.9020          | 2632.0000      |            |
| 29.9222          | 2560.0000      |            |
| 29.9424          | 2588.0000      |            |
| 29.9626          | 2626.0000      |            |
| 29.9828          | 2648.0000      |            |
| 30.0030          | 2675.0000      |            |
| 30.0232          | 2747.0000      |            |
| 30.0435          | 2748.0000      |            |
| 30.0637          | 2848.0000      |            |
| 30.0839          | 2914.0000      |            |

| Dec 04, 14 17:43 | Na2TeC2-xy.txt | Page 19/69 |
|------------------|----------------|------------|
| 30.1041          | 2922.0000      |            |
| 30.1243          | 2907.0000      |            |
| 30.1445          | 2983.0000      |            |
| 30.1647          | 3013.0000      |            |
| 30.1850          | 3149.0000      |            |
| 30.2052          | 3187.0000      |            |
| 30.2254          | 3131.0000      |            |
| 30.2456          | 3240.0000      |            |
| 30.2658          | 3313.0000      |            |
| 30.2860          | 3487.0000      |            |
| 30.3062          | 3520.0000      |            |
| 30.3265          | 3549.0000      |            |
| 30.3467          | 3765.0000      |            |
| 30.3669          | 3819.0000      |            |
| 30.3871          | 3832.0000      |            |
| 30.4073          | 3897.0000      |            |
| 30.4275          | 3945.0000      |            |
| 30.4477          | 3867.0000      |            |
| 30.4680          | 3899.0000      |            |
| 30.4882          | 3847.0000      |            |
| 30.5084          | 3774.0000      |            |
| 30.5286          | 3585.0000      |            |
| 30.5488          | 3544.0000      |            |
| 30.5690          | 3434.0000      |            |
| 30.5893          | 3403.0000      |            |
| 30.6095          | 3405.0000      |            |
| 30.6297          | 3340.0000      |            |
| 30.6499          | 3255.0000      |            |
| 30.6701          | 3115.0000      |            |
| 30.6903          | 3095.0000      |            |
| 30.7105          | 3164.0000      |            |
| 30.7308          | 3043.0000      |            |
| 30.7510          | 2851.0000      |            |
| 30.7712          | 2905.0000      |            |
| 30.7914          | 2848.0000      |            |
| 30.8116          | 2683.0000      |            |
| 30.8318          | 2684.0000      |            |
| 30.8520          | 2637.0000      |            |
| 30.8723          | 2563.0000      |            |
| 30.8925          | 2550.0000      |            |
| 30.9127          | 2593.0000      |            |
| 30.9329          | 2580.0000      |            |
| 30.9531          | 2525.0000      |            |
| 30.9733          | 2513.0000      |            |
| 30.9935          | 2450.0000      |            |
| 31.0138          | 2393.0000      |            |
| 31.0340          | 2311.0000      |            |
| 31.0542          | 2209.0000      |            |
| 31.0744          | 2325.0000      |            |
| 31.0946          | 2316.0000      |            |
| 31.1148          | 2314.0000      |            |
| 31.1350          | 2248.0000      |            |
| 31.1553          | 2303.0000      |            |
| 31.1755          | 2284.0000      |            |
| 31.1957          | 2308.0000      |            |
| 31.2159          | 2280.0000      |            |
| 31.2361          | 2146.0000      |            |
| 31.2563          | 2206.0000      |            |
| 31.2765          | 2221.0000      |            |
| 31.2968          | 2124.0000      |            |
| 31.3170          | 2147.0000      |            |
| 31.3372          | 2221.0000      |            |
| 31.3574          | 2221.0000      |            |
| 31.3776          | 2096.0000      |            |
| 31.3978          | 2087.0000      |            |
| 31.4180          | 2130.0000      |            |
| 31.4383          | 2046.0000      |            |
| 31.4585          | 2108.0000      |            |
| 31.4787          | 2117.0000      |            |

| Dec 04, 14 17:43 | Na2TeC2-xy.txt | Page 20/69 |
|------------------|----------------|------------|
| 31.4989          | 2070.0000      |            |
| 31.5191          | 2134.0000      |            |
| 31.5393          | 2022.0000      |            |
| 31.5595          | 2088.0000      |            |
| 31.5798          | 1982.0000      |            |
| 31.6000          | 2058.0000      |            |
| 31.6202          | 2027.0000      |            |
| 31.6404          | 2088.0000      |            |
| 31.6606          | 2002.0000      |            |
| 31.6808          | 2057.0000      |            |
| 31.7010          | 2125.0000      |            |
| 31.7213          | 1980.0000      |            |
| 31.7415          | 2037.0000      |            |
| 31.7617          | 2081.0000      |            |
| 31.7819          | 2075.0000      |            |
| 31.8021          | 2065.0000      |            |
| 31.8223          | 2096.0000      |            |
| 31.8425          | 2030.0000      |            |
| 31.8628          | 2083.0000      |            |
| 31.8830          | 2031.0000      |            |
| 31.9032          | 1983.0000      |            |
| 31.9234          | 1947.0000      |            |
| 31.9436          | 1938.0000      |            |
| 31.9638          | 2025.0000      |            |
| 31.9840          | 1964.0000      |            |
| 32.0043          | 1978.0000      |            |
| 32.0245          | 1935.0000      |            |
| 32.0447          | 2026.0000      |            |
| 32.0649          | 1989.0000      |            |
| 32.0851          | 1951.0000      |            |
| 32.1053          | 2015.0000      |            |
| 32.1255          | 2024.0000      |            |
| 32.1458          | 1975.0000      |            |
| 32.1660          | 1951.0000      |            |
| 32.1862          | 1934.0000      |            |
| 32.2064          | 1865.0000      |            |
| 32.2266          | 1912.0000      |            |
| 32.2468          | 1902.0000      |            |
| 32.2670          | 1896.0000      |            |
| 32.2873          | 1904.0000      |            |
| 32.3075          | 1985.0000      |            |
| 32.3277          | 1943.0000      |            |
| 32.3479          | 1897.0000      |            |
| 32.3681          | 1993.0000      |            |
| 32.3883          | 1857.0000      |            |
| 32.4085          | 1894.0000      |            |
| 32.4288          | 1933.0000      |            |
| 32.4490          | 1825.0000      |            |
| 32.4692          | 1857.0000      |            |
| 32.4894          | 1898.0000      |            |
| 32.5096          | 1867.0000      |            |
| 32.5298          | 1880.0000      |            |
| 32.5500          | 1883.0000      |            |
| 32.5703          | 1817.0000      |            |
| 32.5905          | 1861.0000      |            |
| 32.6107          | 1923.0000      |            |
| 32.6309          | 1872.0000      |            |
| 32.6511          | 1847.0000      |            |
| 32.6713          | 1888.0000      |            |
| 32.6915          | 1891.0000      |            |
| 32.7118          | 1864.0000      |            |
| 32.7320          | 1821.0000      |            |
| 32.7522          | 1829.0000      |            |
| 32.7724          | 1857.0000      |            |
| 32.7926          | 1885.0000      |            |
| 32.8128          | 1785.0000      |            |
| 32.8330          | 1786.0000      |            |
| 32.8533          | 1861.0000      |            |
| 32.8735          | 1722.0000      |            |

| Dec 04, 14 17:43 | Na2TeC2-xy.txt | Page 21/69 |
|------------------|----------------|------------|
| 32.8937          | 1932.0000      |            |
| 32.9139          | 1816.0000      |            |
| 32.9341          | 1800.0000      |            |
| 32.9543          | 1873.0000      |            |
| 32.9745          | 1783.0000      |            |
| 32.9948          | 1838.0000      |            |
| 33.0150          | 1809.0000      |            |
| 33.0352          | 1803.0000      |            |
| 33.0554          | 1871.0000      |            |
| 33.0756          | 1807.0000      |            |
| 33.0958          | 1851.0000      |            |
| 33.1161          | 1835.0000      |            |
| 33.1363          | 1917.0000      |            |
| 33.1565          | 1867.0000      |            |
| 33.1767          | 1839.0000      |            |
| 33.1969          | 1798.0000      |            |
| 33.2171          | 1792.0000      |            |
| 33.2373          | 1924.0000      |            |
| 33.2576          | 1826.0000      |            |
| 33.2778          | 1799.0000      |            |
| 33.2980          | 1780.0000      |            |
| 33.3182          | 1884.0000      |            |
| 33.3384          | 1781.0000      |            |
| 33.3586          | 1846.0000      |            |
| 33.3788          | 1801.0000      |            |
| 33.3991          | 1801.0000      |            |
| 33.4193          | 1740.0000      |            |
| 33.4395          | 1791.0000      |            |
| 33.4597          | 1844.0000      |            |
| 33.4799          | 1806.0000      |            |
| 33.5001          | 1772.0000      |            |
| 33.5203          | 1749.0000      |            |
| 33.5406          | 1861.0000      |            |
| 33.5608          | 1799.0000      |            |
| 33.5810          | 1773.0000      |            |
| 33.6012          | 1822.0000      |            |
| 33.6214          | 1755.0000      |            |
| 33.6416          | 1831.0000      |            |
| 33.6618          | 1750.0000      |            |
| 33.6821          | 1768.0000      |            |
| 33.7023          | 1681.0000      |            |
| 33.7225          | 1785.0000      |            |
| 33.7427          | 1668.0000      |            |
| 33.7629          | 1776.0000      |            |
| 33.7831          | 1748.0000      |            |
| 33.8033          | 1751.0000      |            |
| 33.8236          | 1700.0000      |            |
| 33.8438          | 1786.0000      |            |
| 33.8640          | 1785.0000      |            |
| 33.8842          | 1677.0000      |            |
| 33.9044          | 1717.0000      |            |
| 33.9246          | 1750.0000      |            |
| 33.9448          | 1797.0000      |            |
| 33.9651          | 1728.0000      |            |
| 33.9853          | 1730.0000      |            |
| 34.0055          | 1735.0000      |            |
| 34.0257          | 1711.0000      |            |
| 34.0459          | 1721.0000      |            |
| 34.0661          | 1725.0000      |            |
| 34.0863          | 1759.0000      |            |
| 34.1066          | 1695.0000      |            |
| 34.1268          | 1701.0000      |            |
| 34.1470          | 1740.0000      |            |
| 34.1672          | 1665.0000      |            |
| 34.1874          | 1804.0000      |            |
| 34.2076          | 1642.0000      |            |
| 34.2278          | 1741.0000      |            |
| 34.2481          | 1757.0000      |            |
| 34.2683          | 1688.0000      |            |

| Dec 04, 14 17:43 | Na2TeC2-xy.txt | Page 22/69 |
|------------------|----------------|------------|
| 34.2885          | 1658.0000      |            |
| 34.3087          | 1670.0000      |            |
| 34.3289          | 1659.0000      |            |
| 34.3491          | 1671.0000      |            |
| 34.3693          | 1708.0000      |            |
| 34.3896          | 1656.0000      |            |
| 34.4098          | 1636.0000      |            |
| 34.4300          | 1720.0000      |            |
| 34.4502          | 1634.0000      |            |
| 34.4704          | 1775.0000      |            |
| 34.4906          | 1644.0000      |            |
| 34.5108          | 1685.0000      |            |
| 34.5311          | 1623.0000      |            |
| 34.5513          | 1706.0000      |            |
| 34.5715          | 1672.0000      |            |
| 34.5917          | 1679.0000      |            |
| 34.6119          | 1607.0000      |            |
| 34.6321          | 1604.0000      |            |
| 34.6523          | 1687.0000      |            |
| 34.6726          | 1727.0000      |            |
| 34.6928          | 1677.0000      |            |
| 34.7130          | 1599.0000      |            |
| 34.7332          | 1622.0000      |            |
| 34.7534          | 1574.0000      |            |
| 34.7736          | 1614.0000      |            |
| 34.7938          | 1634.0000      |            |
| 34.8141          | 1684.0000      |            |
| 34.8343          | 1680.0000      |            |
| 34.8545          | 1578.0000      |            |
| 34.8747          | 1639.0000      |            |
| 34.8949          | 1683.0000      |            |
| 34.9151          | 1624.0000      |            |
| 34.9353          | 1627.0000      |            |
| 34.9556          | 1696.0000      |            |
| 34.9758          | 1595.0000      |            |
| 34.9960          | 1611.0000      |            |
| 35.0162          | 1587.0000      |            |
| 35.0364          | 1570.0000      |            |
| 35.0566          | 1612.0000      |            |
| 35.0768          | 1553.0000      |            |
| 35.0971          | 1600.0000      |            |
| 35.1173          | 1661.0000      |            |
| 35.1375          | 1549.0000      |            |
| 35.1577          | 1539.0000      |            |
| 35.1779          | 1692.0000      |            |
| 35.1981          | 1628.0000      |            |
| 35.2183          | 1539.0000      |            |
| 35.2386          | 1582.0000      |            |
| 35.2588          | 1650.0000      |            |
| 35.2790          | 1578.0000      |            |
| 35.2992          | 1580.0000      |            |
| 35.3194          | 1609.0000      |            |
| 35.3396          | 1602.0000      |            |
| 35.3598          | 1627.0000      |            |
| 35.3801          | 1443.0000      |            |
| 35.4003          | 1525.0000      |            |
| 35.4205          | 1654.0000      |            |
| 35.4407          | 1621.0000      |            |
| 35.4609          | 1564.0000      |            |
| 35.4811          | 1601.0000      |            |
| 35.5013          | 1673.0000      |            |
| 35.5216          | 1608.0000      |            |
| 35.5418          | 1494.0000      |            |
| 35.5620          | 1500.0000      |            |
| 35.5822          | 1562.0000      |            |
| 35.6024          | 1545.0000      |            |
| 35.6226          | 1499.0000      |            |
| 35.6429          | 1534.0000      |            |
| 35.6631          | 1528.0000      |            |

| Dec 04, 14 17:43 | Na2TeC2-xy.txt | Page 23/69 |
|------------------|----------------|------------|
| 35.6833          | 1556.0000      |            |
| 35.7035          | 1533.0000      |            |
| 35.7237          | 1495.0000      |            |
| 35.7439          | 1572.0000      |            |
| 35.7641          | 1565.0000      |            |
| 35.7844          | 1559.0000      |            |
| 35.8046          | 1559.0000      |            |
| 35.8248          | 1481.0000      |            |
| 35.8450          | 1581.0000      |            |
| 35.8652          | 1544.0000      |            |
| 35.8854          | 1497.0000      |            |
| 35.9056          | 1574.0000      |            |
| 35.9259          | 1614.0000      |            |
| 35.9461          | 1568.0000      |            |
| 35.9663          | 1558.0000      |            |
| 35.9865          | 1526.0000      |            |
| 36.0067          | 1559.0000      |            |
| 36.0269          | 1555.0000      |            |
| 36.0471          | 1491.0000      |            |
| 36.0674          | 1468.0000      |            |
| 36.0876          | 1586.0000      |            |
| 36.1078          | 1571.0000      |            |
| 36.1280          | 1464.0000      |            |
| 36.1482          | 1499.0000      |            |
| 36.1684          | 1575.0000      |            |
| 36.1886          | 1519.0000      |            |
| 36.2089          | 1532.0000      |            |
| 36.2291          | 1545.0000      |            |
| 36.2493          | 1503.0000      |            |
| 36.2695          | 1536.0000      |            |
| 36.2897          | 1552.0000      |            |
| 36.3099          | 1525.0000      |            |
| 36.3301          | 1474.0000      |            |
| 36.3504          | 1411.0000      |            |
| 36.3706          | 1540.0000      |            |
| 36.3908          | 1530.0000      |            |
| 36.4110          | 1600.0000      |            |
| 36.4312          | 1585.0000      |            |
| 36.4514          | 1512.0000      |            |
| 36.4716          | 1584.0000      |            |
| 36.4919          | 1504.0000      |            |
| 36.5121          | 1479.0000      |            |
| 36.5323          | 1573.0000      |            |
| 36.5525          | 1532.0000      |            |
| 36.5727          | 1590.0000      |            |
| 36.5929          | 1556.0000      |            |
| 36.6131          | 1566.0000      |            |
| 36.6334          | 1531.0000      |            |
| 36.6536          | 1507.0000      |            |
| 36.6738          | 1510.0000      |            |
| 36.6940          | 1536.0000      |            |
| 36.7142          | 1501.0000      |            |
| 36.7344          | 1555.0000      |            |
| 36.7546          | 1482.0000      |            |
| 36.7749          | 1525.0000      |            |
| 36.7951          | 1497.0000      |            |
| 36.8153          | 1463.0000      |            |
| 36.8355          | 1543.0000      |            |
| 36.8557          | 1489.0000      |            |
| 36.8759          | 1478.0000      |            |
| 36.8961          | 1469.0000      |            |
| 36.9164          | 1498.0000      |            |
| 36.9366          | 1554.0000      |            |
| 36.9568          | 1489.0000      |            |
| 36.9770          | 1532.0000      |            |
| 36.9972          | 1475.0000      |            |
| 37.0174          | 1504.0000      |            |
| 37.0376          | 1465.0000      |            |
| 37.0579          | 1459.0000      |            |

| Dec 04, 14 17:43 | Na2TeC2-xy.txt | Page 24/69 |
|------------------|----------------|------------|
| 37.0781          | 1484.0000      |            |
| 37.0983          | 1492.0000      |            |
| 37.1185          | 1491.0000      |            |
| 37.1387          | 1493.0000      |            |
| 37.1589          | 1455.0000      |            |
| 37.1791          | 1468.0000      |            |
| 37.1994          | 1508.0000      |            |
| 37.2196          | 1470.0000      |            |
| 37.2398          | 1475.0000      |            |
| 37.2600          | 1534.0000      |            |
| 37.2802          | 1463.0000      |            |
| 37.3004          | 1504.0000      |            |
| 37.3206          | 1512.0000      |            |
| 37.3409          | 1495.0000      |            |
| 37.3611          | 1586.0000      |            |
| 37.3813          | 1443.0000      |            |
| 37.4015          | 1506.0000      |            |
| 37.4217          | 1480.0000      |            |
| 37.4419          | 1511.0000      |            |
| 37.4621          | 1557.0000      |            |
| 37.4824          | 1503.0000      |            |
| 37.5026          | 1561.0000      |            |
| 37.5228          | 1415.0000      |            |
| 37.5430          | 1490.0000      |            |
| 37.5632          | 1585.0000      |            |
| 37.5834          | 1464.0000      |            |
| 37.6036          | 1523.0000      |            |
| 37.6239          | 1520.0000      |            |
| 37.6441          | 1536.0000      |            |
| 37.6643          | 1532.0000      |            |
| 37.6845          | 1485.0000      |            |
| 37.7047          | 1492.0000      |            |
| 37.7249          | 1468.0000      |            |
| 37.7451          | 1418.0000      |            |
| 37.7654          | 1488.0000      |            |
| 37.7856          | 1528.0000      |            |
| 37.8058          | 1456.0000      |            |
| 37.8260          | 1419.0000      |            |
| 37.8462          | 1417.0000      |            |
| 37.8664          | 1420.0000      |            |
| 37.8866          | 1438.0000      |            |
| 37.9069          | 1396.0000      |            |
| 37.9271          | 1390.0000      |            |
| 37.9473          | 1417.0000      |            |
| 37.9675          | 1451.0000      |            |
| 37.9877          | 1409.0000      |            |
| 38.0079          | 1408.0000      |            |
| 38.0281          | 1344.0000      |            |
| 38.0484          | 1323.0000      |            |
| 38.0686          | 1344.0000      |            |
| 38.0888          | 1352.0000      |            |
| 38.1090          | 1419.0000      |            |
| 38.1292          | 1406.0000      |            |
| 38.1494          | 1465.0000      |            |
| 38.1697          | 1300.0000      |            |
| 38.1899          | 1432.0000      |            |
| 38.2101          | 1308.0000      |            |
| 38.2303          | 1329.0000      |            |
| 38.2505          | 1297.0000      |            |
| 38.2707          | 1386.0000      |            |
| 38.2909          | 1349.0000      |            |
| 38.3112          | 1387.0000      |            |
| 38.3314          | 1352.0000      |            |
| 38.3516          | 1360.0000      |            |
| 38.3718          | 1368.0000      |            |
| 38.3920          | 1341.0000      |            |
| 38.4122          | 1324.0000      |            |
| 38.4324          | 1385.0000      |            |
| 38.4527          | 1324.0000      |            |

| Dec 04, 14 17:43 | Na2TeC2-xy.txt | Page 25/69 |
|------------------|----------------|------------|
| 38.4729          | 1388.0000      |            |
| 38.4931          | 1361.0000      |            |
| 38.5133          | 1356.0000      |            |
| 38.5335          | 1351.0000      |            |
| 38.5537          | 1399.0000      |            |
| 38.5739          | 1329.0000      |            |
| 38.5942          | 1331.0000      |            |
| 38.6144          | 1351.0000      |            |
| 38.6346          | 1373.0000      |            |
| 38.6548          | 1335.0000      |            |
| 38.6750          | 1342.0000      |            |
| 38.6952          | 1379.0000      |            |
| 38.7154          | 1355.0000      |            |
| 38.7357          | 1372.0000      |            |
| 38.7559          | 1423.0000      |            |
| 38.7761          | 1405.0000      |            |
| 38.7963          | 1458.0000      |            |
| 38.8165          | 1431.0000      |            |
| 38.8367          | 1480.0000      |            |
| 38.8569          | 1420.0000      |            |
| 38.8772          | 1423.0000      |            |
| 38.8974          | 1420.0000      |            |
| 38.9176          | 1479.0000      |            |
| 38.9378          | 1500.0000      |            |
| 38.9580          | 1400.0000      |            |
| 38.9782          | 1440.0000      |            |
| 38.9984          | 1375.0000      |            |
| 39.0187          | 1437.0000      |            |
| 39.0389          | 1398.0000      |            |
| 39.0591          | 1328.0000      |            |
| 39.0793          | 1382.0000      |            |
| 39.0995          | 1325.0000      |            |
| 39.1197          | 1433.0000      |            |
| 39.1399          | 1377.0000      |            |
| 39.1602          | 1327.0000      |            |
| 39.1804          | 1321.0000      |            |
| 39.2006          | 1289.0000      |            |
| 39.2208          | 1325.0000      |            |
| 39.2410          | 1362.0000      |            |
| 39.2612          | 1311.0000      |            |
| 39.2814          | 1277.0000      |            |
| 39.3017          | 1321.0000      |            |
| 39.3219          | 1288.0000      |            |
| 39.3421          | 1332.0000      |            |
| 39.3623          | 1272.0000      |            |
| 39.3825          | 1279.0000      |            |
| 39.4027          | 1254.0000      |            |
| 39.4229          | 1262.0000      |            |
| 39.4432          | 1245.0000      |            |
| 39.4634          | 1276.0000      |            |
| 39.4836          | 1253.0000      |            |
| 39.5038          | 1232.0000      |            |
| 39.5240          | 1262.0000      |            |
| 39.5442          | 1218.0000      |            |
| 39.5644          | 1249.0000      |            |
| 39.5847          | 1226.0000      |            |
| 39.6049          | 1264.0000      |            |
| 39.6251          | 1230.0000      |            |
| 39.6453          | 1227.0000      |            |
| 39.6655          | 1253.0000      |            |
| 39.6857          | 1258.0000      |            |
| 39.7059          | 1282.0000      |            |
| 39.7262          | 1292.0000      |            |
| 39.7464          | 1232.0000      |            |
| 39.7666          | 1192.0000      |            |
| 39.7868          | 1245.0000      |            |
| 39.8070          | 1236.0000      |            |
| 39.8272          | 1245.0000      |            |
| 39.8474          | 1205.0000      |            |

| Dec 04, 14 17:43 | Na2TeC2-xy.txt | Page 26/69 |
|------------------|----------------|------------|
| 39.8677          | 1186.0000      |            |
| 39.8879          | 1303.0000      |            |
| 39.9081          | 1215.0000      |            |
| 39.9283          | 1228.0000      |            |
| 39.9485          | 1187.0000      |            |
| 39.9687          | 1207.0000      |            |
| 39.9889          | 1237.0000      |            |
| 40.0092          | 1203.0000      |            |
| 40.0294          | 1303.0000      |            |
| 40.0496          | 1235.0000      |            |
| 40.0698          | 1174.0000      |            |
| 40.0900          | 1226.0000      |            |
| 40.1102          | 1213.0000      |            |
| 40.1304          | 1208.0000      |            |
| 40.1507          | 1210.0000      |            |
| 40.1709          | 1256.0000      |            |
| 40.1911          | 1205.0000      |            |
| 40.2113          | 1240.0000      |            |
| 40.2315          | 1185.0000      |            |
| 40.2517          | 1178.0000      |            |
| 40.2719          | 1191.0000      |            |
| 40.2922          | 1233.0000      |            |
| 40.3124          | 1209.0000      |            |
| 40.3326          | 1255.0000      |            |
| 40.3528          | 1205.0000      |            |
| 40.3730          | 1202.0000      |            |
| 40.3932          | 1107.0000      |            |
| 40.4134          | 1221.0000      |            |
| 40.4337          | 1203.0000      |            |
| 40.4539          | 1188.0000      |            |
| 40.4741          | 1208.0000      |            |
| 40.4943          | 1136.0000      |            |
| 40.5145          | 1218.0000      |            |
| 40.5347          | 1181.0000      |            |
| 40.5549          | 1233.0000      |            |
| 40.5752          | 1196.0000      |            |
| 40.5954          | 1241.0000      |            |
| 40.6156          | 1176.0000      |            |
| 40.6358          | 1168.0000      |            |
| 40.6560          | 1263.0000      |            |
| 40.6762          | 1223.0000      |            |
| 40.6965          | 1203.0000      |            |
| 40.7167          | 1270.0000      |            |
| 40.7369          | 1242.0000      |            |
| 40.7571          | 1176.0000      |            |
| 40.7773          | 1229.0000      |            |
| 40.7975          | 1263.0000      |            |
| 40.8177          | 1242.0000      |            |
| 40.8380          | 1134.0000      |            |
| 40.8582          | 1196.0000      |            |
| 40.8784          | 1215.0000      |            |
| 40.8986          | 1236.0000      |            |
| 40.9188          | 1203.0000      |            |
| 40.9390          | 1203.0000      |            |
| 40.9592          | 1167.0000      |            |
| 40.9795          | 1229.0000      |            |
| 40.9997          | 1197.0000      |            |
| 41.0199          | 1211.0000      |            |
| 41.0401          | 1171.0000      |            |
| 41.0603          | 1190.0000      |            |
| 41.0805          | 1212.0000      |            |
| 41.1007          | 1189.0000      |            |
| 41.1210          | 1167.0000      |            |
| 41.1412          | 1253.0000      |            |
| 41.1614          | 1183.0000      |            |
| 41.1816          | 1175.0000      |            |
| 41.2018          | 1162.0000      |            |
| 41.2220          | 1130.0000      |            |
| 41.2422          | 1166.0000      |            |

| Dec 04, 14 17:43 | Na2TeC2-xy.txt | Page 27/69 |
|------------------|----------------|------------|
| 41.2625          | 1208.0000      |            |
| 41.2827          | 1224.0000      |            |
| 41.3029          | 1212.0000      |            |
| 41.3231          | 1138.0000      |            |
| 41.3433          | 1159.0000      |            |
| 41.3635          | 1133.0000      |            |
| 41.3837          | 1125.0000      |            |
| 41.4040          | 1134.0000      |            |
| 41.4242          | 1179.0000      |            |
| 41.4444          | 1110.0000      |            |
| 41.4646          | 1126.0000      |            |
| 41.4848          | 1212.0000      |            |
| 41.5050          | 1138.0000      |            |
| 41.5252          | 1210.0000      |            |
| 41.5455          | 1144.0000      |            |
| 41.5657          | 1139.0000      |            |
| 41.5859          | 1176.0000      |            |
| 41.6061          | 1125.0000      |            |
| 41.6263          | 1128.0000      |            |
| 41.6465          | 1154.0000      |            |
| 41.6667          | 1125.0000      |            |
| 41.6870          | 1136.0000      |            |
| 41.7072          | 1200.0000      |            |
| 41.7274          | 1158.0000      |            |
| 41.7476          | 1129.0000      |            |
| 41.7678          | 1126.0000      |            |
| 41.7880          | 1160.0000      |            |
| 41.8082          | 1194.0000      |            |
| 41.8285          | 1170.0000      |            |
| 41.8487          | 1129.0000      |            |
| 41.8689          | 1167.0000      |            |
| 41.8891          | 1089.0000      |            |
| 41.9093          | 1131.0000      |            |
| 41.9295          | 1133.0000      |            |
| 41.9497          | 1093.0000      |            |
| 41.9700          | 1135.0000      |            |
| 41.9902          | 1153.0000      |            |
| 42.0104          | 1208.0000      |            |
| 42.0306          | 1180.0000      |            |
| 42.0508          | 1202.0000      |            |
| 42.0710          | 1187.0000      |            |
| 42.0912          | 1164.0000      |            |
| 42.1115          | 1185.0000      |            |
| 42.1317          | 1209.0000      |            |
| 42.1519          | 1141.0000      |            |
| 42.1721          | 1227.0000      |            |
| 42.1923          | 1147.0000      |            |
| 42.2125          | 1149.0000      |            |
| 42.2327          | 1156.0000      |            |
| 42.2530          | 1094.0000      |            |
| 42.2732          | 1127.0000      |            |
| 42.2934          | 1181.0000      |            |
| 42.3136          | 1179.0000      |            |
| 42.3338          | 1135.0000      |            |
| 42.3540          | 1101.0000      |            |
| 42.3742          | 1128.0000      |            |
| 42.3945          | 1199.0000      |            |
| 42.4147          | 1198.0000      |            |
| 42.4349          | 1161.0000      |            |
| 42.4551          | 1178.0000      |            |
| 42.4753          | 1150.0000      |            |
| 42.4955          | 1151.0000      |            |
| 42.5157          | 1172.0000      |            |
| 42.5360          | 1200.0000      |            |
| 42.5562          | 1198.0000      |            |
| 42.5764          | 1224.0000      |            |
| 42.5966          | 1178.0000      |            |
| 42.6168          | 1087.0000      |            |
| 42.6370          | 1219.0000      |            |

| Dec 04, 14 17:43 | Na2TeC2-xy.txt | Page 28/69 |
|------------------|----------------|------------|
| 42.6572          | 1185.0000      |            |
| 42.6775          | 1136.0000      |            |
| 42.6977          | 1211.0000      |            |
| 42.7179          | 1230.0000      |            |
| 42.7381          | 1189.0000      |            |
| 42.7583          | 1158.0000      |            |
| 42.7785          | 1178.0000      |            |
| 42.7987          | 1177.0000      |            |
| 42.8190          | 1168.0000      |            |
| 42.8392          | 1222.0000      |            |
| 42.8594          | 1117.0000      |            |
| 42.8796          | 1174.0000      |            |
| 42.8998          | 1120.0000      |            |
| 42.9200          | 1215.0000      |            |
| 42.9402          | 1199.0000      |            |
| 42.9605          | 1206.0000      |            |
| 42.9807          | 1144.0000      |            |
| 43.0009          | 1200.0000      |            |
| 43.0211          | 1234.0000      |            |
| 43.0413          | 1176.0000      |            |
| 43.0615          | 1224.0000      |            |
| 43.0817          | 1242.0000      |            |
| 43.1020          | 1223.0000      |            |
| 43.1222          | 1197.0000      |            |
| 43.1424          | 1265.0000      |            |
| 43.1626          | 1194.0000      |            |
| 43.1828          | 1290.0000      |            |
| 43.2030          | 1245.0000      |            |
| 43.2233          | 1254.0000      |            |
| 43.2435          | 1205.0000      |            |
| 43.2637          | 1210.0000      |            |
| 43.2839          | 1278.0000      |            |
| 43.3041          | 1237.0000      |            |
| 43.3243          | 1284.0000      |            |
| 43.3445          | 1254.0000      |            |
| 43.3648          | 1286.0000      |            |
| 43.3850          | 1315.0000      |            |
| 43.4052          | 1310.0000      |            |
| 43.4254          | 1366.0000      |            |
| 43.4456          | 1413.0000      |            |
| 43.4658          | 1405.0000      |            |
| 43.4860          | 1367.0000      |            |
| 43.5063          | 1424.0000      |            |
| 43.5265          | 1394.0000      |            |
| 43.5467          | 1486.0000      |            |
| 43.5669          | 1489.0000      |            |
| 43.5871          | 1550.0000      |            |
| 43.6073          | 1397.0000      |            |
| 43.6275          | 1461.0000      |            |
| 43.6478          | 1493.0000      |            |
| 43.6680          | 1423.0000      |            |
| 43.6882          | 1465.0000      |            |
| 43.7084          | 1383.0000      |            |
| 43.7286          | 1336.0000      |            |
| 43.7488          | 1349.0000      |            |
| 43.7690          | 1363.0000      |            |
| 43.7893          | 1271.0000      |            |
| 43.8095          | 1330.0000      |            |
| 43.8297          | 1348.0000      |            |
| 43.8499          | 1287.0000      |            |
| 43.8701          | 1296.0000      |            |
| 43.8903          | 1235.0000      |            |
| 43.9105          | 1218.0000      |            |
| 43.9308          | 1231.0000      |            |
| 43.9510          | 1237.0000      |            |
| 43.9712          | 1251.0000      |            |
| 43.9914          | 1180.0000      |            |
| 44.0116          | 1168.0000      |            |
| 44.0318          | 1208.0000      |            |

| Dec 04, 14 17:43 | Na2TeC2-xy.txt | Page 29/69 |
|------------------|----------------|------------|
| 44.0520          | 1198.0000      |            |
| 44.0723          | 1177.0000      |            |
| 44.0925          | 1259.0000      |            |
| 44.1127          | 1183.0000      |            |
| 44.1329          | 1190.0000      |            |
| 44.1531          | 1159.0000      |            |
| 44.1733          | 1203.0000      |            |
| 44.1935          | 1202.0000      |            |
| 44.2138          | 1148.0000      |            |
| 44.2340          | 1244.0000      |            |
| 44.2542          | 1160.0000      |            |
| 44.2744          | 1174.0000      |            |
| 44.2946          | 1257.0000      |            |
| 44.3148          | 1217.0000      |            |
| 44.3350          | 1180.0000      |            |
| 44.3553          | 1188.0000      |            |
| 44.3755          | 1244.0000      |            |
| 44.3957          | 1187.0000      |            |
| 44.4159          | 1195.0000      |            |
| 44.4361          | 1196.0000      |            |
| 44.4563          | 1172.0000      |            |
| 44.4765          | 1177.0000      |            |
| 44.4968          | 1242.0000      |            |
| 44.5170          | 1164.0000      |            |
| 44.5372          | 1201.0000      |            |
| 44.5574          | 1202.0000      |            |
| 44.5776          | 1225.0000      |            |
| 44.5978          | 1207.0000      |            |
| 44.6180          | 1241.0000      |            |
| 44.6383          | 1240.0000      |            |
| 44.6585          | 1215.0000      |            |
| 44.6787          | 1191.0000      |            |
| 44.6989          | 1243.0000      |            |
| 44.7191          | 1195.0000      |            |
| 44.7393          | 1214.0000      |            |
| 44.7595          | 1149.0000      |            |
| 44.7798          | 1176.0000      |            |
| 44.8000          | 1182.0000      |            |
| 44.8202          | 1182.0000      |            |
| 44.8404          | 1215.0000      |            |
| 44.8606          | 1235.0000      |            |
| 44.8808          | 1221.0000      |            |
| 44.9010          | 1178.0000      |            |
| 44.9213          | 1238.0000      |            |
| 44.9415          | 1208.0000      |            |
| 44.9617          | 1135.0000      |            |
| 44.9819          | 1176.0000      |            |
| 45.0021          | 1192.0000      |            |
| 45.0223          | 1171.0000      |            |
| 45.0425          | 1198.0000      |            |
| 45.0628          | 1162.0000      |            |
| 45.0830          | 1181.0000      |            |
| 45.1032          | 1193.0000      |            |
| 45.1234          | 1165.0000      |            |
| 45.1436          | 1193.0000      |            |
| 45.1638          | 1271.0000      |            |
| 45.1840          | 1209.0000      |            |
| 45.2043          | 1156.0000      |            |
| 45.2245          | 1176.0000      |            |
| 45.2447          | 1186.0000      |            |
| 45.2649          | 1189.0000      |            |
| 45.2851          | 1169.0000      |            |
| 45.3053          | 1160.0000      |            |
| 45.3255          | 1179.0000      |            |
| 45.3458          | 1133.0000      |            |
| 45.3660          | 1206.0000      |            |
| 45.3862          | 1207.0000      |            |
| 45.4064          | 1145.0000      |            |
| 45.4266          | 1169.0000      |            |

| Dec 04, 14 17:43 | Na2TeC2-xy.txt | Page 30/69 |
|------------------|----------------|------------|
| 45.4468          | 1186.0000      |            |
| 45.4670          | 1128.0000      |            |
| 45.4873          | 1147.0000      |            |
| 45.5075          | 1170.0000      |            |
| 45.5277          | 1165.0000      |            |
| 45.5479          | 1129.0000      |            |
| 45.5681          | 1132.0000      |            |
| 45.5883          | 1152.0000      |            |
| 45.6085          | 1159.0000      |            |
| 45.6288          | 1137.0000      |            |
| 45.6490          | 1176.0000      |            |
| 45.6692          | 1121.0000      |            |
| 45.6894          | 1144.0000      |            |
| 45.7096          | 1183.0000      |            |
| 45.7298          | 1115.0000      |            |
| 45.7501          | 1143.0000      |            |
| 45.7703          | 1148.0000      |            |
| 45.7905          | 1135.0000      |            |
| 45.8107          | 1105.0000      |            |
| 45.8309          | 1102.0000      |            |
| 45.8511          | 1162.0000      |            |
| 45.8713          | 1210.0000      |            |
| 45.8916          | 1130.0000      |            |
| 45.9118          | 1112.0000      |            |
| 45.9320          | 1171.0000      |            |
| 45.9522          | 1152.0000      |            |
| 45.9724          | 1259.0000      |            |
| 45.9926          | 1093.0000      |            |
| 46.0128          | 1154.0000      |            |
| 46.0331          | 1127.0000      |            |
| 46.0533          | 1147.0000      |            |
| 46.0735          | 1187.0000      |            |
| 46.0937          | 1106.0000      |            |
| 46.1139          | 1178.0000      |            |
| 46.1341          | 1121.0000      |            |
| 46.1543          | 1128.0000      |            |
| 46.1746          | 1187.0000      |            |
| 46.1948          | 1155.0000      |            |
| 46.2150          | 1149.0000      |            |
| 46.2352          | 1168.0000      |            |
| 46.2554          | 1117.0000      |            |
| 46.2756          | 1177.0000      |            |
| 46.2958          | 1176.0000      |            |
| 46.3161          | 1202.0000      |            |
| 46.3363          | 1177.0000      |            |
| 46.3565          | 1159.0000      |            |
| 46.3767          | 1151.0000      |            |
| 46.3969          | 1099.0000      |            |
| 46.4171          | 1147.0000      |            |
| 46.4373          | 1154.0000      |            |
| 46.4576          | 1119.0000      |            |
| 46.4778          | 1207.0000      |            |
| 46.4980          | 1106.0000      |            |
| 46.5182          | 1210.0000      |            |
| 46.5384          | 1130.0000      |            |
| 46.5586          | 1123.0000      |            |
| 46.5788          | 1177.0000      |            |
| 46.5991          | 1175.0000      |            |
| 46.6193          | 1190.0000      |            |
| 46.6395          | 1171.0000      |            |
| 46.6597          | 1117.0000      |            |
| 46.6799          | 1184.0000      |            |
| 46.7001          | 1173.0000      |            |
| 46.7203          | 1102.0000      |            |
| 46.7406          | 1181.0000      |            |
| 46.7608          | 1153.0000      |            |
| 46.7810          | 1174.0000      |            |
| 46.8012          | 1109.0000      |            |
| 46.8214          | 1088.0000      |            |

| Dec 04, 14 17:43 | Na2TeC2-xy.txt | Page 31/69 |
|------------------|----------------|------------|
| 46.8416          | 1156.0000      |            |
| 46.8618          | 1182.0000      |            |
| 46.8821          | 1194.0000      |            |
| 46.9023          | 1143.0000      |            |
| 46.9225          | 1135.0000      |            |
| 46.9427          | 1118.0000      |            |
| 46.9629          | 1122.0000      |            |
| 46.9831          | 1090.0000      |            |
| 47.0033          | 1132.0000      |            |
| 47.0236          | 1178.0000      |            |
| 47.0438          | 1159.0000      |            |
| 47.0640          | 1084.0000      |            |
| 47.0842          | 1220.0000      |            |
| 47.1044          | 1148.0000      |            |
| 47.1246          | 1156.0000      |            |
| 47.1448          | 1116.0000      |            |
| 47.1651          | 1153.0000      |            |
| 47.1853          | 1184.0000      |            |
| 47.2055          | 1115.0000      |            |
| 47.2257          | 1121.0000      |            |
| 47.2459          | 1205.0000      |            |
| 47.2661          | 1133.0000      |            |
| 47.2863          | 1138.0000      |            |
| 47.3066          | 1139.0000      |            |
| 47.3268          | 1114.0000      |            |
| 47.3470          | 1164.0000      |            |
| 47.3672          | 1123.0000      |            |
| 47.3874          | 1189.0000      |            |
| 47.4076          | 1153.0000      |            |
| 47.4278          | 1120.0000      |            |
| 47.4481          | 1122.0000      |            |
| 47.4683          | 1185.0000      |            |
| 47.4885          | 1172.0000      |            |
| 47.5087          | 1125.0000      |            |
| 47.5289          | 1119.0000      |            |
| 47.5491          | 1143.0000      |            |
| 47.5693          | 1170.0000      |            |
| 47.5896          | 1155.0000      |            |
| 47.6098          | 1088.0000      |            |
| 47.6300          | 1159.0000      |            |
| 47.6502          | 1129.0000      |            |
| 47.6704          | 1088.0000      |            |
| 47.6906          | 1145.0000      |            |
| 47.7108          | 1107.0000      |            |
| 47.7311          | 1173.0000      |            |
| 47.7513          | 1153.0000      |            |
| 47.7715          | 1115.0000      |            |
| 47.7917          | 1201.0000      |            |
| 47.8119          | 1162.0000      |            |
| 47.8321          | 1134.0000      |            |
| 47.8523          | 1133.0000      |            |
| 47.8726          | 1163.0000      |            |
| 47.8928          | 1178.0000      |            |
| 47.9130          | 1152.0000      |            |
| 47.9332          | 1159.0000      |            |
| 47.9534          | 1164.0000      |            |
| 47.9736          | 1157.0000      |            |
| 47.9938          | 1185.0000      |            |
| 48.0141          | 1160.0000      |            |
| 48.0343          | 1231.0000      |            |
| 48.0545          | 1156.0000      |            |
| 48.0747          | 1153.0000      |            |
| 48.0949          | 1166.0000      |            |
| 48.1151          | 1144.0000      |            |
| 48.1353          | 1177.0000      |            |
| 48.1556          | 1049.0000      |            |
| 48.1758          | 1150.0000      |            |
| 48.1960          | 1151.0000      |            |
| 48.2162          | 1159.0000      |            |

| Dec 04, 14 17:43 | Na2TeC2-xy.txt | Page 32/69 |
|------------------|----------------|------------|
| 48.2364          | 1145.0000      |            |
| 48.2566          | 1140.0000      |            |
| 48.2769          | 1150.0000      |            |
| 48.2971          | 1163.0000      |            |
| 48.3173          | 1102.0000      |            |
| 48.3375          | 1118.0000      |            |
| 48.3577          | 1154.0000      |            |
| 48.3779          | 1103.0000      |            |
| 48.3981          | 1069.0000      |            |
| 48.4184          | 1131.0000      |            |
| 48.4386          | 1156.0000      |            |
| 48.4588          | 1150.0000      |            |
| 48.4790          | 1078.0000      |            |
| 48.4992          | 1074.0000      |            |
| 48.5194          | 1091.0000      |            |
| 48.5396          | 1134.0000      |            |
| 48.5599          | 1172.0000      |            |
| 48.5801          | 1088.0000      |            |
| 48.6003          | 1096.0000      |            |
| 48.6205          | 1118.0000      |            |
| 48.6407          | 1156.0000      |            |
| 48.6609          | 1125.0000      |            |
| 48.6811          | 1058.0000      |            |
| 48.7014          | 1068.0000      |            |
| 48.7216          | 1124.0000      |            |
| 48.7418          | 1100.0000      |            |
| 48.7620          | 1131.0000      |            |
| 48.7822          | 1097.0000      |            |
| 48.8024          | 1158.0000      |            |
| 48.8226          | 1096.0000      |            |
| 48.8429          | 1155.0000      |            |
| 48.8631          | 1134.0000      |            |
| 48.8833          | 1187.0000      |            |
| 48.9035          | 1177.0000      |            |
| 48.9237          | 1101.0000      |            |
| 48.9439          | 1077.0000      |            |
| 48.9641          | 1149.0000      |            |
| 48.9844          | 1103.0000      |            |
| 49.0046          | 1126.0000      |            |
| 49.0248          | 1131.0000      |            |
| 49.0450          | 1112.0000      |            |
| 49.0652          | 1161.0000      |            |
| 49.0854          | 1150.0000      |            |
| 49.1056          | 1194.0000      |            |
| 49.1259          | 1118.0000      |            |
| 49.1461          | 1153.0000      |            |
| 49.1663          | 1181.0000      |            |
| 49.1865          | 1108.0000      |            |
| 49.2067          | 1111.0000      |            |
| 49.2269          | 1133.0000      |            |
| 49.2471          | 1150.0000      |            |
| 49.2674          | 1138.0000      |            |
| 49.2876          | 1086.0000      |            |
| 49.3078          | 1153.0000      |            |
| 49.3280          | 1117.0000      |            |
| 49.3482          | 1130.0000      |            |
| 49.3684          | 1089.0000      |            |
| 49.3886          | 1120.0000      |            |
| 49.4089          | 1145.0000      |            |
| 49.4291          | 1125.0000      |            |
| 49.4493          | 1103.0000      |            |
| 49.4695          | 1081.0000      |            |
| 49.4897          | 1098.0000      |            |
| 49.5099          | 1110.0000      |            |
| 49.5301          | 1110.0000      |            |
| 49.5504          | 1102.0000      |            |
| 49.5706          | 1192.0000      |            |
| 49.5908          | 1094.0000      |            |
| 49.6110          | 1142.0000      |            |



| Dec 04, 14 17:43 | Na2TeC2-xy.txt | Page 33/69 |
|------------------|----------------|------------|
| 49.6312          | 1108.0000      |            |
| 49.6514          | 1136.0000      |            |
| 49.6716          | 1158.0000      |            |
| 49.6919          | 1142.0000      |            |
| 49.7121          | 1195.0000      |            |
| 49.7323          | 1075.0000      |            |
| 49.7525          | 1213.0000      |            |
| 49.7727          | 1169.0000      |            |
| 49.7929          | 1126.0000      |            |
| 49.8131          | 1171.0000      |            |
| 49.8334          | 1183.0000      |            |
| 49.8536          | 1162.0000      |            |
| 49.8738          | 1174.0000      |            |
| 49.8940          | 1217.0000      |            |
| 49.9142          | 1204.0000      |            |
| 49.9344          | 1218.0000      |            |
| 49.9546          | 1222.0000      |            |
| 49.9749          | 1189.0000      |            |
| 49.9951          | 1204.0000      |            |
| 50.0153          | 1231.0000      |            |
| 50.0355          | 1217.0000      |            |
| 50.0557          | 1224.0000      |            |
| 50.0759          | 1159.0000      |            |
| 50.0961          | 1241.0000      |            |
| 50.1164          | 1291.0000      |            |
| 50.1366          | 1189.0000      |            |
| 50.1568          | 1226.0000      |            |
| 50.1770          | 1211.0000      |            |
| 50.1972          | 1237.0000      |            |
| 50.2174          | 1231.0000      |            |
| 50.2376          | 1212.0000      |            |
| 50.2579          | 1229.0000      |            |
| 50.2781          | 1238.0000      |            |
| 50.2983          | 1253.0000      |            |
| 50.3185          | 1270.0000      |            |
| 50.3387          | 1220.0000      |            |
| 50.3589          | 1153.0000      |            |
| 50.3791          | 1224.0000      |            |
| 50.3994          | 1230.0000      |            |
| 50.4196          | 1172.0000      |            |
| 50.4398          | 1246.0000      |            |
| 50.4600          | 1248.0000      |            |
| 50.4802          | 1244.0000      |            |
| 50.5004          | 1198.0000      |            |
| 50.5206          | 1227.0000      |            |
| 50.5409          | 1214.0000      |            |
| 50.5611          | 1182.0000      |            |
| 50.5813          | 1236.0000      |            |
| 50.6015          | 1247.0000      |            |
| 50.6217          | 1250.0000      |            |
| 50.6419          | 1236.0000      |            |
| 50.6621          | 1213.0000      |            |
| 50.6824          | 1221.0000      |            |
| 50.7026          | 1233.0000      |            |
| 50.7228          | 1206.0000      |            |
| 50.7430          | 1203.0000      |            |
| 50.7632          | 1228.0000      |            |
| 50.7834          | 1181.0000      |            |
| 50.8037          | 1199.0000      |            |
| 50.8239          | 1143.0000      |            |
| 50.8441          | 1192.0000      |            |
| 50.8643          | 1107.0000      |            |
| 50.8845          | 1109.0000      |            |
| 50.9047          | 1135.0000      |            |
| 50.9249          | 1179.0000      |            |
| 50.9452          | 1077.0000      |            |
| 50.9654          | 1132.0000      |            |
| 50.9856          | 1119.0000      |            |
| 51.0058          | 1062.0000      |            |

| Dec 04, 14 17:43 | Na2TeC2-xy.txt | Page 34/69 |
|------------------|----------------|------------|
| 51.0260          | 1073.0000      |            |
| 51.0462          | 1065.0000      |            |
| 51.0664          | 1052.0000      |            |
| 51.0867          | 1019.0000      |            |
| 51.1069          | 1025.0000      |            |
| 51.1271          | 1077.0000      |            |
| 51.1473          | 1014.0000      |            |
| 51.1675          | 1053.0000      |            |
| 51.1877          | 1064.0000      |            |
| 51.2079          | 972.0000       |            |
| 51.2282          | 1067.0000      |            |
| 51.2484          | 938.0000       |            |
| 51.2686          | 1025.0000      |            |
| 51.2888          | 1038.0000      |            |
| 51.3090          | 967.0000       |            |
| 51.3292          | 996.0000       |            |
| 51.3494          | 1016.0000      |            |
| 51.3697          | 982.0000       |            |
| 51.3899          | 973.0000       |            |
| 51.4101          | 986.0000       |            |
| 51.4303          | 990.0000       |            |
| 51.4505          | 988.0000       |            |
| 51.4707          | 984.0000       |            |
| 51.4909          | 1015.0000      |            |
| 51.5112          | 1021.0000      |            |
| 51.5314          | 1017.0000      |            |
| 51.5516          | 971.0000       |            |
| 51.5718          | 1043.0000      |            |
| 51.5920          | 971.0000       |            |
| 51.6122          | 1009.0000      |            |
| 51.6324          | 916.0000       |            |
| 51.6527          | 970.0000       |            |
| 51.6729          | 977.0000       |            |
| 51.6931          | 989.0000       |            |
| 51.7133          | 996.0000       |            |
| 51.7335          | 995.0000       |            |
| 51.7537          | 1002.0000      |            |
| 51.7739          | 985.0000       |            |
| 51.7942          | 955.0000       |            |
| 51.8144          | 1015.0000      |            |
| 51.8346          | 959.0000       |            |
| 51.8548          | 973.0000       |            |
| 51.8750          | 991.0000       |            |
| 51.8952          | 945.0000       |            |
| 51.9154          | 934.0000       |            |
| 51.9357          | 979.0000       |            |
| 51.9559          | 951.0000       |            |
| 51.9761          | 916.0000       |            |
| 51.9963          | 952.0000       |            |
| 52.0165          | 946.0000       |            |
| 52.0367          | 983.0000       |            |
| 52.0569          | 930.0000       |            |
| 52.0772          | 913.0000       |            |
| 52.0974          | 992.0000       |            |
| 52.1176          | 931.0000       |            |
| 52.1378          | 1005.0000      |            |
| 52.1580          | 1005.0000      |            |
| 52.1782          | 970.0000       |            |
| 52.1984          | 984.0000       |            |
| 52.2187          | 962.0000       |            |
| 52.2389          | 968.0000       |            |
| 52.2591          | 952.0000       |            |
| 52.2793          | 985.0000       |            |
| 52.2995          | 976.0000       |            |
| 52.3197          | 917.0000       |            |
| 52.3399          | 970.0000       |            |
| 52.3602          | 937.0000       |            |
| 52.3804          | 926.0000       |            |
| 52.4006          | 880.0000       |            |

| Dec 04, 14 17:43 | Na2TeC2-xy.txt | Page 35/69 |
|------------------|----------------|------------|
| 52.4208          | 957.0000       |            |
| 52.4410          | 952.0000       |            |
| 52.4612          | 915.0000       |            |
| 52.4814          | 959.0000       |            |
| 52.5017          | 910.0000       |            |
| 52.5219          | 910.0000       |            |
| 52.5421          | 940.0000       |            |
| 52.5623          | 940.0000       |            |
| 52.5825          | 934.0000       |            |
| 52.6027          | 941.0000       |            |
| 52.6229          | 936.0000       |            |
| 52.6432          | 891.0000       |            |
| 52.6634          | 905.0000       |            |
| 52.6836          | 948.0000       |            |
| 52.7038          | 899.0000       |            |
| 52.7240          | 927.0000       |            |
| 52.7442          | 930.0000       |            |
| 52.7644          | 887.0000       |            |
| 52.7847          | 956.0000       |            |
| 52.8049          | 920.0000       |            |
| 52.8251          | 909.0000       |            |
| 52.8453          | 885.0000       |            |
| 52.8655          | 913.0000       |            |
| 52.8857          | 906.0000       |            |
| 52.9059          | 872.0000       |            |
| 52.9262          | 908.0000       |            |
| 52.9464          | 932.0000       |            |
| 52.9666          | 944.0000       |            |
| 52.9868          | 884.0000       |            |
| 53.0070          | 901.0000       |            |
| 53.0272          | 896.0000       |            |
| 53.0474          | 976.0000       |            |
| 53.0677          | 924.0000       |            |
| 53.0879          | 937.0000       |            |
| 53.1081          | 901.0000       |            |
| 53.1283          | 883.0000       |            |
| 53.1485          | 867.0000       |            |
| 53.1687          | 923.0000       |            |
| 53.1889          | 907.0000       |            |
| 53.2092          | 901.0000       |            |
| 53.2294          | 908.0000       |            |
| 53.2496          | 895.0000       |            |
| 53.2698          | 958.0000       |            |
| 53.2900          | 934.0000       |            |
| 53.3102          | 902.0000       |            |
| 53.3305          | 925.0000       |            |
| 53.3507          | 914.0000       |            |
| 53.3709          | 876.0000       |            |
| 53.3911          | 932.0000       |            |
| 53.4113          | 949.0000       |            |
| 53.4315          | 930.0000       |            |
| 53.4517          | 917.0000       |            |
| 53.4720          | 944.0000       |            |
| 53.4922          | 946.0000       |            |
| 53.5124          | 910.0000       |            |
| 53.5326          | 892.0000       |            |
| 53.5528          | 946.0000       |            |
| 53.5730          | 888.0000       |            |
| 53.5932          | 911.0000       |            |
| 53.6135          | 947.0000       |            |
| 53.6337          | 904.0000       |            |
| 53.6539          | 931.0000       |            |
| 53.6741          | 916.0000       |            |
| 53.6943          | 909.0000       |            |
| 53.7145          | 899.0000       |            |
| 53.7347          | 922.0000       |            |
| 53.7550          | 921.0000       |            |
| 53.7752          | 847.0000       |            |
| 53.7954          | 948.0000       |            |

| Dec 04, 14 17:43 | Na2TeC2-xy.txt | Page 36/69 |
|------------------|----------------|------------|
| 53.8156          | 902.0000       |            |
| 53.8358          | 928.0000       |            |
| 53.8560          | 858.0000       |            |
| 53.8762          | 933.0000       |            |
| 53.8965          | 893.0000       |            |
| 53.9167          | 910.0000       |            |
| 53.9369          | 912.0000       |            |
| 53.9571          | 898.0000       |            |
| 53.9773          | 844.0000       |            |
| 53.9975          | 889.0000       |            |
| 54.0177          | 959.0000       |            |
| 54.0380          | 908.0000       |            |
| 54.0582          | 969.0000       |            |
| 54.0784          | 926.0000       |            |
| 54.0986          | 968.0000       |            |
| 54.1188          | 963.0000       |            |
| 54.1390          | 941.0000       |            |
| 54.1592          | 918.0000       |            |
| 54.1795          | 920.0000       |            |
| 54.1997          | 935.0000       |            |
| 54.2199          | 938.0000       |            |
| 54.2401          | 940.0000       |            |
| 54.2603          | 926.0000       |            |
| 54.2805          | 895.0000       |            |
| 54.3007          | 874.0000       |            |
| 54.3210          | 901.0000       |            |
| 54.3412          | 929.0000       |            |
| 54.3614          | 931.0000       |            |
| 54.3816          | 885.0000       |            |
| 54.4018          | 870.0000       |            |
| 54.4220          | 909.0000       |            |
| 54.4422          | 866.0000       |            |
| 54.4625          | 861.0000       |            |
| 54.4827          | 853.0000       |            |
| 54.5029          | 851.0000       |            |
| 54.5231          | 863.0000       |            |
| 54.5433          | 849.0000       |            |
| 54.5635          | 835.0000       |            |
| 54.5837          | 824.0000       |            |
| 54.6040          | 893.0000       |            |
| 54.6242          | 846.0000       |            |
| 54.6444          | 855.0000       |            |
| 54.6646          | 849.0000       |            |
| 54.6848          | 790.0000       |            |
| 54.7050          | 824.0000       |            |
| 54.7252          | 864.0000       |            |
| 54.7455          | 831.0000       |            |
| 54.7657          | 824.0000       |            |
| 54.7859          | 842.0000       |            |
| 54.8061          | 799.0000       |            |
| 54.8263          | 823.0000       |            |
| 54.8465          | 858.0000       |            |
| 54.8667          | 929.0000       |            |
| 54.8870          | 846.0000       |            |
| 54.9072          | 806.0000       |            |
| 54.9274          | 851.0000       |            |
| 54.9476          | 837.0000       |            |
| 54.9678          | 796.0000       |            |
| 54.9880          | 781.0000       |            |
| 55.0082          | 826.0000       |            |
| 55.0285          | 833.0000       |            |
| 55.0487          | 876.0000       |            |
| 55.0689          | 886.0000       |            |
| 55.0891          | 813.0000       |            |
| 55.1093          | 835.0000       |            |
| 55.1295          | 786.0000       |            |
| 55.1497          | 792.0000       |            |
| 55.1700          | 819.0000       |            |
| 55.1902          | 821.0000       |            |

| Dec 04, 14 17:43 | Na2TeC2-xy.txt | Page 37/69 |
|------------------|----------------|------------|
| 55.2104          | 800.0000       |            |
| 55.2306          | 811.0000       |            |
| 55.2508          | 832.0000       |            |
| 55.2710          | 802.0000       |            |
| 55.2912          | 802.0000       |            |
| 55.3115          | 794.0000       |            |
| 55.3317          | 860.0000       |            |
| 55.3519          | 806.0000       |            |
| 55.3721          | 863.0000       |            |
| 55.3923          | 809.0000       |            |
| 55.4125          | 796.0000       |            |
| 55.4327          | 765.0000       |            |
| 55.4530          | 846.0000       |            |
| 55.4732          | 851.0000       |            |
| 55.4934          | 868.0000       |            |
| 55.5136          | 788.0000       |            |
| 55.5338          | 767.0000       |            |
| 55.5540          | 804.0000       |            |
| 55.5742          | 807.0000       |            |
| 55.5945          | 801.0000       |            |
| 55.6147          | 841.0000       |            |
| 55.6349          | 809.0000       |            |
| 55.6551          | 755.0000       |            |
| 55.6753          | 766.0000       |            |
| 55.6955          | 775.0000       |            |
| 55.7157          | 771.0000       |            |
| 55.7360          | 837.0000       |            |
| 55.7562          | 765.0000       |            |
| 55.7764          | 784.0000       |            |
| 55.7966          | 823.0000       |            |
| 55.8168          | 826.0000       |            |
| 55.8370          | 791.0000       |            |
| 55.8573          | 835.0000       |            |
| 55.8775          | 771.0000       |            |
| 55.8977          | 769.0000       |            |
| 55.9179          | 821.0000       |            |
| 55.9381          | 759.0000       |            |
| 55.9583          | 817.0000       |            |
| 55.9785          | 792.0000       |            |
| 55.9988          | 748.0000       |            |
| 56.0190          | 762.0000       |            |
| 56.0392          | 784.0000       |            |
| 56.0594          | 762.0000       |            |
| 56.0796          | 772.0000       |            |
| 56.0998          | 754.0000       |            |
| 56.1200          | 759.0000       |            |
| 56.1403          | 796.0000       |            |
| 56.1605          | 736.0000       |            |
| 56.1807          | 825.0000       |            |
| 56.2009          | 803.0000       |            |
| 56.2211          | 786.0000       |            |
| 56.2413          | 752.0000       |            |
| 56.2615          | 745.0000       |            |
| 56.2818          | 841.0000       |            |
| 56.3020          | 789.0000       |            |
| 56.3222          | 743.0000       |            |
| 56.3424          | 829.0000       |            |
| 56.3626          | 772.0000       |            |
| 56.3828          | 762.0000       |            |
| 56.4030          | 820.0000       |            |
| 56.4233          | 738.0000       |            |
| 56.4435          | 811.0000       |            |
| 56.4637          | 786.0000       |            |
| 56.4839          | 757.0000       |            |
| 56.5041          | 795.0000       |            |
| 56.5243          | 832.0000       |            |
| 56.5445          | 818.0000       |            |
| 56.5648          | 825.0000       |            |
| 56.5850          | 763.0000       |            |

| Dec 04, 14 17:43 | Na2TeC2-xy.txt | Page 38/69 |
|------------------|----------------|------------|
| 56.6052          | 764.0000       |            |
| 56.6254          | 809.0000       |            |
| 56.6456          | 810.0000       |            |
| 56.6658          | 746.0000       |            |
| 56.6860          | 786.0000       |            |
| 56.7063          | 769.0000       |            |
| 56.7265          | 754.0000       |            |
| 56.7467          | 766.0000       |            |
| 56.7669          | 758.0000       |            |
| 56.7871          | 725.0000       |            |
| 56.8073          | 708.0000       |            |
| 56.8275          | 720.0000       |            |
| 56.8478          | 741.0000       |            |
| 56.8680          | 750.0000       |            |
| 56.8882          | 787.0000       |            |
| 56.9084          | 685.0000       |            |
| 56.9286          | 732.0000       |            |
| 56.9488          | 777.0000       |            |
| 56.9690          | 782.0000       |            |
| 56.9893          | 719.0000       |            |
| 57.0095          | 748.0000       |            |
| 57.0297          | 741.0000       |            |
| 57.0499          | 724.0000       |            |
| 57.0701          | 746.0000       |            |
| 57.0903          | 803.0000       |            |
| 57.1105          | 761.0000       |            |
| 57.1308          | 743.0000       |            |
| 57.1510          | 764.0000       |            |
| 57.1712          | 742.0000       |            |
| 57.1914          | 699.0000       |            |
| 57.2116          | 741.0000       |            |
| 57.2318          | 769.0000       |            |
| 57.2520          | 740.0000       |            |
| 57.2723          | 743.0000       |            |
| 57.2925          | 716.0000       |            |
| 57.3127          | 714.0000       |            |
| 57.3329          | 718.0000       |            |
| 57.3531          | 777.0000       |            |
| 57.3733          | 733.0000       |            |
| 57.3935          | 706.0000       |            |
| 57.4138          | 751.0000       |            |
| 57.4340          | 789.0000       |            |
| 57.4542          | 714.0000       |            |
| 57.4744          | 728.0000       |            |
| 57.4946          | 710.0000       |            |
| 57.5148          | 706.0000       |            |
| 57.5350          | 722.0000       |            |
| 57.5553          | 690.0000       |            |
| 57.5755          | 735.0000       |            |
| 57.5957          | 726.0000       |            |
| 57.6159          | 695.0000       |            |
| 57.6361          | 698.0000       |            |
| 57.6563          | 724.0000       |            |
| 57.6765          | 727.0000       |            |
| 57.6968          | 756.0000       |            |
| 57.7170          | 715.0000       |            |
| 57.7372          | 712.0000       |            |
| 57.7574          | 690.0000       |            |
| 57.7776          | 716.0000       |            |
| 57.7978          | 759.0000       |            |
| 57.8180          | 719.0000       |            |
| 57.8383          | 712.0000       |            |
| 57.8585          | 690.0000       |            |
| 57.8787          | 711.0000       |            |
| 57.8989          | 717.0000       |            |
| 57.9191          | 713.0000       |            |
| 57.9393          | 740.0000       |            |
| 57.9595          | 754.0000       |            |
| 57.9798          | 684.0000       |            |

| Dec 04, 14 17:43 | Na2TeC2-xy.txt | Page 39/69 |
|------------------|----------------|------------|
| 58.0000          | 753.0000       |            |
| 58.0202          | 749.0000       |            |
| 58.0404          | 734.0000       |            |
| 58.0606          | 716.0000       |            |
| 58.0808          | 667.0000       |            |
| 58.1010          | 741.0000       |            |
| 58.1213          | 688.0000       |            |
| 58.1415          | 710.0000       |            |
| 58.1617          | 703.0000       |            |
| 58.1819          | 714.0000       |            |
| 58.2021          | 720.0000       |            |
| 58.2223          | 825.0000       |            |
| 58.2425          | 689.0000       |            |
| 58.2628          | 710.0000       |            |
| 58.2830          | 717.0000       |            |
| 58.3032          | 712.0000       |            |
| 58.3234          | 735.0000       |            |
| 58.3436          | 748.0000       |            |
| 58.3638          | 710.0000       |            |
| 58.3841          | 684.0000       |            |
| 58.4043          | 693.0000       |            |
| 58.4245          | 675.0000       |            |
| 58.4447          | 734.0000       |            |
| 58.4649          | 705.0000       |            |
| 58.4851          | 691.0000       |            |
| 58.5053          | 655.0000       |            |
| 58.5256          | 661.0000       |            |
| 58.5458          | 690.0000       |            |
| 58.5660          | 674.0000       |            |
| 58.5862          | 733.0000       |            |
| 58.6064          | 698.0000       |            |
| 58.6266          | 675.0000       |            |
| 58.6468          | 701.0000       |            |
| 58.6671          | 699.0000       |            |
| 58.6873          | 742.0000       |            |
| 58.7075          | 736.0000       |            |
| 58.7277          | 668.0000       |            |
| 58.7479          | 681.0000       |            |
| 58.7681          | 675.0000       |            |
| 58.7883          | 741.0000       |            |
| 58.8086          | 687.0000       |            |
| 58.8288          | 714.0000       |            |
| 58.8490          | 685.0000       |            |
| 58.8692          | 667.0000       |            |
| 58.8894          | 657.0000       |            |
| 58.9096          | 701.0000       |            |
| 58.9298          | 684.0000       |            |
| 58.9501          | 716.0000       |            |
| 58.9703          | 651.0000       |            |
| 58.9905          | 674.0000       |            |
| 59.0107          | 680.0000       |            |
| 59.0309          | 665.0000       |            |
| 59.0511          | 658.0000       |            |
| 59.0713          | 656.0000       |            |
| 59.0916          | 681.0000       |            |
| 59.1118          | 686.0000       |            |
| 59.1320          | 701.0000       |            |
| 59.1522          | 713.0000       |            |
| 59.1724          | 679.0000       |            |
| 59.1926          | 710.0000       |            |
| 59.2128          | 673.0000       |            |
| 59.2331          | 706.0000       |            |
| 59.2533          | 650.0000       |            |
| 59.2735          | 642.0000       |            |
| 59.2937          | 708.0000       |            |
| 59.3139          | 662.0000       |            |
| 59.3341          | 678.0000       |            |
| 59.3543          | 675.0000       |            |
| 59.3746          | 689.0000       |            |

| Dec 04, 14 17:43 | Na2TeC2-xy.txt | Page 40/69 |
|------------------|----------------|------------|
| 59.3948          | 670.0000       |            |
| 59.4150          | 679.0000       |            |
| 59.4352          | 660.0000       |            |
| 59.4554          | 685.0000       |            |
| 59.4756          | 647.0000       |            |
| 59.4958          | 670.0000       |            |
| 59.5161          | 736.0000       |            |
| 59.5363          | 642.0000       |            |
| 59.5565          | 680.0000       |            |
| 59.5767          | 666.0000       |            |
| 59.5969          | 699.0000       |            |
| 59.6171          | 731.0000       |            |
| 59.6373          | 661.0000       |            |
| 59.6576          | 716.0000       |            |
| 59.6778          | 637.0000       |            |
| 59.6980          | 661.0000       |            |
| 59.7182          | 689.0000       |            |
| 59.7384          | 675.0000       |            |
| 59.7586          | 684.0000       |            |
| 59.7788          | 665.0000       |            |
| 59.7991          | 687.0000       |            |
| 59.8193          | 669.0000       |            |
| 59.8395          | 692.0000       |            |
| 59.8597          | 665.0000       |            |
| 59.8799          | 645.0000       |            |
| 59.9001          | 700.0000       |            |
| 59.9203          | 718.0000       |            |
| 59.9406          | 672.0000       |            |
| 59.9608          | 645.0000       |            |
| 59.9810          | 675.0000       |            |
| 60.0012          | 637.0000       |            |
| 60.0214          | 663.0000       |            |
| 60.0416          | 690.0000       |            |
| 60.0618          | 600.0000       |            |
| 60.0821          | 674.0000       |            |
| 60.1023          | 692.0000       |            |
| 60.1225          | 656.0000       |            |
| 60.1427          | 630.0000       |            |
| 60.1629          | 645.0000       |            |
| 60.1831          | 657.0000       |            |
| 60.2033          | 645.0000       |            |
| 60.2236          | 686.0000       |            |
| 60.2438          | 708.0000       |            |
| 60.2640          | 621.0000       |            |
| 60.2842          | 622.0000       |            |
| 60.3044          | 660.0000       |            |
| 60.3246          | 634.0000       |            |
| 60.3448          | 682.0000       |            |
| 60.3651          | 659.0000       |            |
| 60.3853          | 676.0000       |            |
| 60.4055          | 647.0000       |            |
| 60.4257          | 702.0000       |            |
| 60.4459          | 625.0000       |            |
| 60.4661          | 691.0000       |            |
| 60.4863          | 610.0000       |            |
| 60.5066          | 628.0000       |            |
| 60.5268          | 664.0000       |            |
| 60.5470          | 671.0000       |            |
| 60.5672          | 666.0000       |            |
| 60.5874          | 683.0000       |            |
| 60.6076          | 683.0000       |            |
| 60.6278          | 657.0000       |            |
| 60.6481          | 632.0000       |            |
| 60.6683          | 658.0000       |            |
| 60.6885          | 668.0000       |            |
| 60.7087          | 673.0000       |            |
| 60.7289          | 656.0000       |            |
| 60.7491          | 665.0000       |            |
| 60.7693          | 656.0000       |            |

| Dec 04, 14 17:43 | Na2TeC2-xy.txt | Page 41/69 |
|------------------|----------------|------------|
| 60.7896          | 691.0000       |            |
| 60.8098          | 672.0000       |            |
| 60.8300          | 617.0000       |            |
| 60.8502          | 636.0000       |            |
| 60.8704          | 659.0000       |            |
| 60.8906          | 639.0000       |            |
| 60.9109          | 630.0000       |            |
| 60.9311          | 648.0000       |            |
| 60.9513          | 620.0000       |            |
| 60.9715          | 632.0000       |            |
| 60.9917          | 664.0000       |            |
| 61.0119          | 632.0000       |            |
| 61.0321          | 672.0000       |            |
| 61.0524          | 634.0000       |            |
| 61.0726          | 682.0000       |            |
| 61.0928          | 684.0000       |            |
| 61.1130          | 692.0000       |            |
| 61.1332          | 621.0000       |            |
| 61.1534          | 648.0000       |            |
| 61.1736          | 638.0000       |            |
| 61.1939          | 682.0000       |            |
| 61.2141          | 627.0000       |            |
| 61.2343          | 612.0000       |            |
| 61.2545          | 653.0000       |            |
| 61.2747          | 678.0000       |            |
| 61.2949          | 636.0000       |            |
| 61.3151          | 595.0000       |            |
| 61.3354          | 599.0000       |            |
| 61.3556          | 638.0000       |            |
| 61.3758          | 666.0000       |            |
| 61.3960          | 633.0000       |            |
| 61.4162          | 607.0000       |            |
| 61.4364          | 597.0000       |            |
| 61.4566          | 651.0000       |            |
| 61.4769          | 622.0000       |            |
| 61.4971          | 625.0000       |            |
| 61.5173          | 606.0000       |            |
| 61.5375          | 630.0000       |            |
| 61.5577          | 647.0000       |            |
| 61.5779          | 627.0000       |            |
| 61.5981          | 677.0000       |            |
| 61.6184          | 653.0000       |            |
| 61.6386          | 641.0000       |            |
| 61.6588          | 683.0000       |            |
| 61.6790          | 674.0000       |            |
| 61.6992          | 647.0000       |            |
| 61.7194          | 607.0000       |            |
| 61.7396          | 636.0000       |            |
| 61.7599          | 592.0000       |            |
| 61.7801          | 640.0000       |            |
| 61.8003          | 647.0000       |            |
| 61.8205          | 628.0000       |            |
| 61.8407          | 640.0000       |            |
| 61.8609          | 612.0000       |            |
| 61.8811          | 659.0000       |            |
| 61.9014          | 614.0000       |            |
| 61.9216          | 645.0000       |            |
| 61.9418          | 643.0000       |            |
| 61.9620          | 596.0000       |            |
| 61.9822          | 618.0000       |            |
| 62.0024          | 625.0000       |            |
| 62.0226          | 648.0000       |            |
| 62.0429          | 654.0000       |            |
| 62.0631          | 608.0000       |            |
| 62.0833          | 618.0000       |            |
| 62.1035          | 670.0000       |            |
| 62.1237          | 615.0000       |            |
| 62.1439          | 654.0000       |            |
| 62.1641          | 619.0000       |            |

| Dec 04, 14 17:43 | Na2TeC2-xy.txt | Page 42/69 |
|------------------|----------------|------------|
| 62.1844          | 628.0000       |            |
| 62.2046          | 630.0000       |            |
| 62.2248          | 611.0000       |            |
| 62.2450          | 604.0000       |            |
| 62.2652          | 593.0000       |            |
| 62.2854          | 622.0000       |            |
| 62.3056          | 650.0000       |            |
| 62.3259          | 608.0000       |            |
| 62.3461          | 663.0000       |            |
| 62.3663          | 649.0000       |            |
| 62.3865          | 611.0000       |            |
| 62.4067          | 623.0000       |            |
| 62.4269          | 636.0000       |            |
| 62.4471          | 622.0000       |            |
| 62.4674          | 645.0000       |            |
| 62.4876          | 632.0000       |            |
| 62.5078          | 638.0000       |            |
| 62.5280          | 651.0000       |            |
| 62.5482          | 579.0000       |            |
| 62.5684          | 602.0000       |            |
| 62.5886          | 594.0000       |            |
| 62.6089          | 633.0000       |            |
| 62.6291          | 654.0000       |            |
| 62.6493          | 610.0000       |            |
| 62.6695          | 646.0000       |            |
| 62.6897          | 606.0000       |            |
| 62.7099          | 643.0000       |            |
| 62.7301          | 636.0000       |            |
| 62.7504          | 635.0000       |            |
| 62.7706          | 584.0000       |            |
| 62.7908          | 565.0000       |            |
| 62.8110          | 608.0000       |            |
| 62.8312          | 647.0000       |            |
| 62.8514          | 592.0000       |            |
| 62.8716          | 614.0000       |            |
| 62.8919          | 678.0000       |            |
| 62.9121          | 629.0000       |            |
| 62.9323          | 632.0000       |            |
| 62.9525          | 604.0000       |            |
| 62.9727          | 628.0000       |            |
| 62.9929          | 624.0000       |            |
| 63.0131          | 573.0000       |            |
| 63.0334          | 596.0000       |            |
| 63.0536          | 608.0000       |            |
| 63.0738          | 620.0000       |            |
| 63.0940          | 647.0000       |            |
| 63.1142          | 638.0000       |            |
| 63.1344          | 604.0000       |            |
| 63.1546          | 619.0000       |            |
| 63.1749          | 604.0000       |            |
| 63.1951          | 663.0000       |            |
| 63.2153          | 644.0000       |            |
| 63.2355          | 617.0000       |            |
| 63.2557          | 635.0000       |            |
| 63.2759          | 602.0000       |            |
| 63.2961          | 629.0000       |            |
| 63.3164          | 580.0000       |            |
| 63.3366          | 620.0000       |            |
| 63.3568          | 596.0000       |            |
| 63.3770          | 592.0000       |            |
| 63.3972          | 607.0000       |            |
| 63.4174          | 616.0000       |            |
| 63.4377          | 592.0000       |            |
| 63.4579          | 582.0000       |            |
| 63.4781          | 640.0000       |            |
| 63.4983          | 595.0000       |            |
| 63.5185          | 617.0000       |            |
| 63.5387          | 631.0000       |            |
| 63.5589          | 669.0000       |            |

| Dec 04, 14 17:43 | Na2TeC2-xy.txt | Page 43/69 |
|------------------|----------------|------------|
| 63.5792          | 615.0000       |            |
| 63.5994          | 604.0000       |            |
| 63.6196          | 593.0000       |            |
| 63.6398          | 564.0000       |            |
| 63.6600          | 601.0000       |            |
| 63.6802          | 585.0000       |            |
| 63.7004          | 567.0000       |            |
| 63.7207          | 599.0000       |            |
| 63.7409          | 665.0000       |            |
| 63.7611          | 608.0000       |            |
| 63.7813          | 640.0000       |            |
| 63.8015          | 607.0000       |            |
| 63.8217          | 594.0000       |            |
| 63.8419          | 637.0000       |            |
| 63.8622          | 639.0000       |            |
| 63.8824          | 579.0000       |            |
| 63.9026          | 565.0000       |            |
| 63.9228          | 572.0000       |            |
| 63.9430          | 601.0000       |            |
| 63.9632          | 612.0000       |            |
| 63.9834          | 566.0000       |            |
| 64.0037          | 603.0000       |            |
| 64.0239          | 609.0000       |            |
| 64.0441          | 575.0000       |            |
| 64.0643          | 574.0000       |            |
| 64.0845          | 585.0000       |            |
| 64.1047          | 571.0000       |            |
| 64.1249          | 585.0000       |            |
| 64.1452          | 636.0000       |            |
| 64.1654          | 614.0000       |            |
| 64.1856          | 589.0000       |            |
| 64.2058          | 591.0000       |            |
| 64.2260          | 574.0000       |            |
| 64.2462          | 553.0000       |            |
| 64.2664          | 584.0000       |            |
| 64.2867          | 605.0000       |            |
| 64.3069          | 598.0000       |            |
| 64.3271          | 616.0000       |            |
| 64.3473          | 618.0000       |            |
| 64.3675          | 550.0000       |            |
| 64.3877          | 576.0000       |            |
| 64.4079          | 605.0000       |            |
| 64.4282          | 606.0000       |            |
| 64.4484          | 544.0000       |            |
| 64.4686          | 613.0000       |            |
| 64.4888          | 572.0000       |            |
| 64.5090          | 591.0000       |            |
| 64.5292          | 572.0000       |            |
| 64.5494          | 580.0000       |            |
| 64.5697          | 580.0000       |            |
| 64.5899          | 582.0000       |            |
| 64.6101          | 574.0000       |            |
| 64.6303          | 564.0000       |            |
| 64.6505          | 619.0000       |            |
| 64.6707          | 605.0000       |            |
| 64.6909          | 565.0000       |            |
| 64.7112          | 588.0000       |            |
| 64.7314          | 555.0000       |            |
| 64.7516          | 598.0000       |            |
| 64.7718          | 569.0000       |            |
| 64.7920          | 608.0000       |            |
| 64.8122          | 568.0000       |            |
| 64.8324          | 552.0000       |            |
| 64.8527          | 583.0000       |            |
| 64.8729          | 565.0000       |            |
| 64.8931          | 583.0000       |            |
| 64.9133          | 587.0000       |            |
| 64.9335          | 541.0000       |            |
| 64.9537          | 631.0000       |            |

| Dec 04, 14 17:43 | Na2TeC2-xy.txt | Page 44/69 |
|------------------|----------------|------------|
| 64.9739          | 580.0000       |            |
| 64.9942          | 556.0000       |            |
| 65.0144          | 544.0000       |            |
| 65.0346          | 615.0000       |            |
| 65.0548          | 584.0000       |            |
| 65.0750          | 571.0000       |            |
| 65.0952          | 542.0000       |            |
| 65.1154          | 585.0000       |            |
| 65.1357          | 558.0000       |            |
| 65.1559          | 558.0000       |            |
| 65.1761          | 556.0000       |            |
| 65.1963          | 547.0000       |            |
| 65.2165          | 561.0000       |            |
| 65.2367          | 534.0000       |            |
| 65.2569          | 601.0000       |            |
| 65.2772          | 577.0000       |            |
| 65.2974          | 613.0000       |            |
| 65.3176          | 566.0000       |            |
| 65.3378          | 566.0000       |            |
| 65.3580          | 541.0000       |            |
| 65.3782          | 556.0000       |            |
| 65.3984          | 585.0000       |            |
| 65.4187          | 567.0000       |            |
| 65.4389          | 542.0000       |            |
| 65.4591          | 557.0000       |            |
| 65.4793          | 565.0000       |            |
| 65.4995          | 531.0000       |            |
| 65.5197          | 583.0000       |            |
| 65.5399          | 564.0000       |            |
| 65.5602          | 559.0000       |            |
| 65.5804          | 529.0000       |            |
| 65.6006          | 563.0000       |            |
| 65.6208          | 574.0000       |            |
| 65.6410          | 505.0000       |            |
| 65.6612          | 537.0000       |            |
| 65.6814          | 524.0000       |            |
| 65.7017          | 585.0000       |            |
| 65.7219          | 534.0000       |            |
| 65.7421          | 562.0000       |            |
| 65.7623          | 528.0000       |            |
| 65.7825          | 546.0000       |            |
| 65.8027          | 547.0000       |            |
| 65.8229          | 544.0000       |            |
| 65.8432          | 532.0000       |            |
| 65.8634          | 516.0000       |            |
| 65.8836          | 592.0000       |            |
| 65.9038          | 576.0000       |            |
| 65.9240          | 552.0000       |            |
| 65.9442          | 530.0000       |            |
| 65.9645          | 588.0000       |            |
| 65.9847          | 540.0000       |            |
| 66.0049          | 536.0000       |            |
| 66.0251          | 571.0000       |            |
| 66.0453          | 529.0000       |            |
| 66.0655          | 508.0000       |            |
| 66.0857          | 550.0000       |            |
| 66.1060          | 555.0000       |            |
| 66.1262          | 530.0000       |            |
| 66.1464          | 568.0000       |            |
| 66.1666          | 527.0000       |            |
| 66.1868          | 569.0000       |            |
| 66.2070          | 506.0000       |            |
| 66.2272          | 548.0000       |            |
| 66.2475          | 554.0000       |            |
| 66.2677          | 524.0000       |            |
| 66.2879          | 508.0000       |            |
| 66.3081          | 552.0000       |            |
| 66.3283          | 552.0000       |            |
| 66.3485          | 515.0000       |            |

| Dec 04, 14 17:43 | Na2TeC2-xy.txt | Page 45/69 |
|------------------|----------------|------------|
| 66.3687          | 524.0000       |            |
| 66.3890          | 555.0000       |            |
| 66.4092          | 514.0000       |            |
| 66.4294          | 587.0000       |            |
| 66.4496          | 559.0000       |            |
| 66.4698          | 534.0000       |            |
| 66.4900          | 557.0000       |            |
| 66.5102          | 581.0000       |            |
| 66.5305          | 522.0000       |            |
| 66.5507          | 523.0000       |            |
| 66.5709          | 545.0000       |            |
| 66.5911          | 532.0000       |            |
| 66.6113          | 536.0000       |            |
| 66.6315          | 576.0000       |            |
| 66.6517          | 532.0000       |            |
| 66.6720          | 513.0000       |            |
| 66.6922          | 500.0000       |            |
| 66.7124          | 515.0000       |            |
| 66.7326          | 527.0000       |            |
| 66.7528          | 530.0000       |            |
| 66.7730          | 506.0000       |            |
| 66.7932          | 563.0000       |            |
| 66.8135          | 532.0000       |            |
| 66.8337          | 487.0000       |            |
| 66.8539          | 513.0000       |            |
| 66.8741          | 548.0000       |            |
| 66.8943          | 540.0000       |            |
| 66.9145          | 522.0000       |            |
| 66.9347          | 524.0000       |            |
| 66.9550          | 524.0000       |            |
| 66.9752          | 469.0000       |            |
| 66.9954          | 520.0000       |            |
| 67.0156          | 514.0000       |            |
| 67.0358          | 531.0000       |            |
| 67.0560          | 570.0000       |            |
| 67.0762          | 524.0000       |            |
| 67.0965          | 512.0000       |            |
| 67.1167          | 505.0000       |            |
| 67.1369          | 544.0000       |            |
| 67.1571          | 518.0000       |            |
| 67.1773          | 530.0000       |            |
| 67.1975          | 479.0000       |            |
| 67.2177          | 550.0000       |            |
| 67.2380          | 538.0000       |            |
| 67.2582          | 514.0000       |            |
| 67.2784          | 512.0000       |            |
| 67.2986          | 505.0000       |            |
| 67.3188          | 508.0000       |            |
| 67.3390          | 518.0000       |            |
| 67.3592          | 529.0000       |            |
| 67.3795          | 521.0000       |            |
| 67.3997          | 496.0000       |            |
| 67.4199          | 507.0000       |            |
| 67.4401          | 502.0000       |            |
| 67.4603          | 502.0000       |            |
| 67.4805          | 510.0000       |            |
| 67.5007          | 539.0000       |            |
| 67.5210          | 460.0000       |            |
| 67.5412          | 482.0000       |            |
| 67.5614          | 531.0000       |            |
| 67.5816          | 526.0000       |            |
| 67.6018          | 546.0000       |            |
| 67.6220          | 517.0000       |            |
| 67.6422          | 501.0000       |            |
| 67.6625          | 532.0000       |            |
| 67.6827          | 469.0000       |            |
| 67.7029          | 502.0000       |            |
| 67.7231          | 517.0000       |            |
| 67.7433          | 526.0000       |            |

| Dec 04, 14 17:43 | Na2TeC2-xy.txt | Page 46/69 |
|------------------|----------------|------------|
| 67.7635          | 509.0000       |            |
| 67.7837          | 528.0000       |            |
| 67.8040          | 485.0000       |            |
| 67.8242          | 509.0000       |            |
| 67.8444          | 476.0000       |            |
| 67.8646          | 522.0000       |            |
| 67.8848          | 503.0000       |            |
| 67.9050          | 500.0000       |            |
| 67.9252          | 508.0000       |            |
| 67.9455          | 535.0000       |            |
| 67.9657          | 524.0000       |            |
| 67.9859          | 533.0000       |            |
| 68.0061          | 503.0000       |            |
| 68.0263          | 494.0000       |            |
| 68.0465          | 479.0000       |            |
| 68.0667          | 519.0000       |            |
| 68.0870          | 503.0000       |            |
| 68.1072          | 492.0000       |            |
| 68.1274          | 469.0000       |            |
| 68.1476          | 529.0000       |            |
| 68.1678          | 453.0000       |            |
| 68.1880          | 522.0000       |            |
| 68.2082          | 512.0000       |            |
| 68.2285          | 491.0000       |            |
| 68.2487          | 499.0000       |            |
| 68.2689          | 489.0000       |            |
| 68.2891          | 466.0000       |            |
| 68.3093          | 506.0000       |            |
| 68.3295          | 475.0000       |            |
| 68.3497          | 503.0000       |            |
| 68.3700          | 525.0000       |            |
| 68.3902          | 482.0000       |            |
| 68.4104          | 472.0000       |            |
| 68.4306          | 525.0000       |            |
| 68.4508          | 461.0000       |            |
| 68.4710          | 474.0000       |            |
| 68.4913          | 486.0000       |            |
| 68.5115          | 527.0000       |            |
| 68.5317          | 521.0000       |            |
| 68.5519          | 471.0000       |            |
| 68.5721          | 492.0000       |            |
| 68.5923          | 499.0000       |            |
| 68.6125          | 478.0000       |            |
| 68.6328          | 485.0000       |            |
| 68.6530          | 505.0000       |            |
| 68.6732          | 431.0000       |            |
| 68.6934          | 483.0000       |            |
| 68.7136          | 479.0000       |            |
| 68.7338          | 492.0000       |            |
| 68.7540          | 454.0000       |            |
| 68.7743          | 500.0000       |            |
| 68.7945          | 464.0000       |            |
| 68.8147          | 456.0000       |            |
| 68.8349          | 457.0000       |            |
| 68.8551          | 500.0000       |            |
| 68.8753          | 479.0000       |            |
| 68.8955          | 496.0000       |            |
| 68.9158          | 489.0000       |            |
| 68.9360          | 460.0000       |            |
| 68.9562          | 482.0000       |            |
| 68.9764          | 452.0000       |            |
| 68.9966          | 478.0000       |            |
| 69.0168          | 439.0000       |            |
| 69.0370          | 466.0000       |            |
| 69.0573          | 514.0000       |            |
| 69.0775          | 496.0000       |            |
| 69.0977          | 477.0000       |            |
| 69.1179          | 467.0000       |            |
| 69.1381          | 485.0000       |            |

| Dec 04, 14 17:43 | Na2TeC2-xy.txt | Page 47/69 |
|------------------|----------------|------------|
| 69.1583          | 483.0000       |            |
| 69.1785          | 517.0000       |            |
| 69.1988          | 464.0000       |            |
| 69.2190          | 457.0000       |            |
| 69.2392          | 468.0000       |            |
| 69.2594          | 474.0000       |            |
| 69.2796          | 496.0000       |            |
| 69.2998          | 479.0000       |            |
| 69.3200          | 463.0000       |            |
| 69.3403          | 432.0000       |            |
| 69.3605          | 456.0000       |            |
| 69.3807          | 454.0000       |            |
| 69.4009          | 478.0000       |            |
| 69.4211          | 504.0000       |            |
| 69.4413          | 461.0000       |            |
| 69.4615          | 443.0000       |            |
| 69.4818          | 440.0000       |            |
| 69.5020          | 470.0000       |            |
| 69.5222          | 491.0000       |            |
| 69.5424          | 488.0000       |            |
| 69.5626          | 497.0000       |            |
| 69.5828          | 507.0000       |            |
| 69.6030          | 465.0000       |            |
| 69.6233          | 457.0000       |            |
| 69.6435          | 476.0000       |            |
| 69.6637          | 472.0000       |            |
| 69.6839          | 466.0000       |            |
| 69.7041          | 462.0000       |            |
| 69.7243          | 495.0000       |            |
| 69.7445          | 475.0000       |            |
| 69.7648          | 460.0000       |            |
| 69.7850          | 473.0000       |            |
| 69.8052          | 487.0000       |            |
| 69.8254          | 471.0000       |            |
| 69.8456          | 458.0000       |            |
| 69.8658          | 495.0000       |            |
| 69.8860          | 448.0000       |            |
| 69.9063          | 490.0000       |            |
| 69.9265          | 482.0000       |            |
| 69.9467          | 433.0000       |            |
| 69.9669          | 464.0000       |            |
| 69.9871          | 437.0000       |            |
| 70.0073          | 455.0000       |            |
| 70.0275          | 453.0000       |            |
| 70.0478          | 478.0000       |            |
| 70.0680          | 517.0000       |            |
| 70.0882          | 444.0000       |            |
| 70.1084          | 449.0000       |            |
| 70.1286          | 438.0000       |            |
| 70.1488          | 412.0000       |            |
| 70.1690          | 466.0000       |            |
| 70.1893          | 472.0000       |            |
| 70.2095          | 475.0000       |            |
| 70.2297          | 471.0000       |            |
| 70.2499          | 435.0000       |            |
| 70.2701          | 441.0000       |            |
| 70.2903          | 481.0000       |            |
| 70.3105          | 488.0000       |            |
| 70.3308          | 478.0000       |            |
| 70.3510          | 468.0000       |            |
| 70.3712          | 479.0000       |            |
| 70.3914          | 461.0000       |            |
| 70.4116          | 461.0000       |            |
| 70.4318          | 443.0000       |            |
| 70.4520          | 428.0000       |            |
| 70.4723          | 439.0000       |            |
| 70.4925          | 441.0000       |            |
| 70.5127          | 435.0000       |            |
| 70.5329          | 448.0000       |            |

| Dec 04, 14 17:43 | Na2TeC2-xy.txt | Page 48/69 |
|------------------|----------------|------------|
| 70.5531          | 475.0000       |            |
| 70.5733          | 467.0000       |            |
| 70.5935          | 433.0000       |            |
| 70.6138          | 479.0000       |            |
| 70.6340          | 451.0000       |            |
| 70.6542          | 464.0000       |            |
| 70.6744          | 496.0000       |            |
| 70.6946          | 429.0000       |            |
| 70.7148          | 477.0000       |            |
| 70.7350          | 463.0000       |            |
| 70.7553          | 437.0000       |            |
| 70.7755          | 464.0000       |            |
| 70.7957          | 450.0000       |            |
| 70.8159          | 456.0000       |            |
| 70.8361          | 469.0000       |            |
| 70.8563          | 463.0000       |            |
| 70.8765          | 432.0000       |            |
| 70.8968          | 475.0000       |            |
| 70.9170          | 472.0000       |            |
| 70.9372          | 488.0000       |            |
| 70.9574          | 448.0000       |            |
| 70.9776          | 472.0000       |            |
| 70.9978          | 478.0000       |            |
| 71.0181          | 439.0000       |            |
| 71.0383          | 454.0000       |            |
| 71.0585          | 478.0000       |            |
| 71.0787          | 526.0000       |            |
| 71.0989          | 414.0000       |            |
| 71.1191          | 476.0000       |            |
| 71.1393          | 427.0000       |            |
| 71.1596          | 425.0000       |            |
| 71.1798          | 452.0000       |            |
| 71.2000          | 471.0000       |            |
| 71.2202          | 480.0000       |            |
| 71.2404          | 477.0000       |            |
| 71.2606          | 454.0000       |            |
| 71.2808          | 466.0000       |            |
| 71.3011          | 450.0000       |            |
| 71.3213          | 464.0000       |            |
| 71.3415          | 437.0000       |            |
| 71.3617          | 384.0000       |            |
| 71.3819          | 485.0000       |            |
| 71.4021          | 447.0000       |            |
| 71.4223          | 473.0000       |            |
| 71.4426          | 442.0000       |            |
| 71.4628          | 468.0000       |            |
| 71.4830          | 445.0000       |            |
| 71.5032          | 454.0000       |            |
| 71.5234          | 449.0000       |            |
| 71.5436          | 486.0000       |            |
| 71.5638          | 452.0000       |            |
| 71.5841          | 434.0000       |            |
| 71.6043          | 468.0000       |            |
| 71.6245          | 450.0000       |            |
| 71.6447          | 452.0000       |            |
| 71.6649          | 507.0000       |            |
| 71.6851          | 497.0000       |            |
| 71.7053          | 452.0000       |            |
| 71.7256          | 439.0000       |            |
| 71.7458          | 457.0000       |            |
| 71.7660          | 451.0000       |            |
| 71.7862          | 460.0000       |            |
| 71.8064          | 412.0000       |            |
| 71.8266          | 421.0000       |            |
| 71.8468          | 435.0000       |            |
| 71.8671          | 436.0000       |            |
| 71.8873          | 459.0000       |            |
| 71.9075          | 486.0000       |            |
| 71.9277          | 447.0000       |            |



| Dec 04, 14 17:43 | Na2TeC2-xy.txt | Page 49/69 |
|------------------|----------------|------------|
| 71.9479          | 427.0000       |            |
| 71.9681          | 455.0000       |            |
| 71.9883          | 457.0000       |            |
| 72.0086          | 448.0000       |            |
| 72.0288          | 452.0000       |            |
| 72.0490          | 431.0000       |            |
| 72.0692          | 412.0000       |            |
| 72.0894          | 467.0000       |            |
| 72.1096          | 448.0000       |            |
| 72.1298          | 469.0000       |            |
| 72.1501          | 462.0000       |            |
| 72.1703          | 469.0000       |            |
| 72.1905          | 465.0000       |            |
| 72.2107          | 433.0000       |            |
| 72.2309          | 442.0000       |            |
| 72.2511          | 447.0000       |            |
| 72.2713          | 433.0000       |            |
| 72.2916          | 440.0000       |            |
| 72.3118          | 416.0000       |            |
| 72.3320          | 435.0000       |            |
| 72.3522          | 449.0000       |            |
| 72.3724          | 454.0000       |            |
| 72.3926          | 431.0000       |            |
| 72.4128          | 453.0000       |            |
| 72.4331          | 408.0000       |            |
| 72.4533          | 427.0000       |            |
| 72.4735          | 471.0000       |            |
| 72.4937          | 436.0000       |            |
| 72.5139          | 466.0000       |            |
| 72.5341          | 446.0000       |            |
| 72.5543          | 432.0000       |            |
| 72.5746          | 408.0000       |            |
| 72.5948          | 437.0000       |            |
| 72.6150          | 445.0000       |            |
| 72.6352          | 411.0000       |            |
| 72.6554          | 447.0000       |            |
| 72.6756          | 455.0000       |            |
| 72.6958          | 424.0000       |            |
| 72.7161          | 461.0000       |            |
| 72.7363          | 447.0000       |            |
| 72.7565          | 444.0000       |            |
| 72.7767          | 472.0000       |            |
| 72.7969          | 444.0000       |            |
| 72.8171          | 420.0000       |            |
| 72.8373          | 410.0000       |            |
| 72.8576          | 431.0000       |            |
| 72.8778          | 420.0000       |            |
| 72.8980          | 398.0000       |            |
| 72.9182          | 443.0000       |            |
| 72.9384          | 423.0000       |            |
| 72.9586          | 436.0000       |            |
| 72.9788          | 408.0000       |            |
| 72.9991          | 412.0000       |            |
| 73.0193          | 396.0000       |            |
| 73.0395          | 431.0000       |            |
| 73.0597          | 408.0000       |            |
| 73.0799          | 421.0000       |            |
| 73.1001          | 423.0000       |            |
| 73.1203          | 437.0000       |            |
| 73.1406          | 425.0000       |            |
| 73.1608          | 415.0000       |            |
| 73.1810          | 429.0000       |            |
| 73.2012          | 409.0000       |            |
| 73.2214          | 415.0000       |            |
| 73.2416          | 428.0000       |            |
| 73.2618          | 406.0000       |            |
| 73.2821          | 460.0000       |            |
| 73.3023          | 405.0000       |            |
| 73.3225          | 403.0000       |            |

| Dec 04, 14 17:43 | Na2TeC2-xy.txt | Page 50/69 |
|------------------|----------------|------------|
| 73.3427          | 424.0000       |            |
| 73.3629          | 423.0000       |            |
| 73.3831          | 391.0000       |            |
| 73.4033          | 402.0000       |            |
| 73.4236          | 431.0000       |            |
| 73.4438          | 417.0000       |            |
| 73.4640          | 404.0000       |            |
| 73.4842          | 422.0000       |            |
| 73.5044          | 408.0000       |            |
| 73.5246          | 452.0000       |            |
| 73.5449          | 463.0000       |            |
| 73.5651          | 402.0000       |            |
| 73.5853          | 446.0000       |            |
| 73.6055          | 448.0000       |            |
| 73.6257          | 403.0000       |            |
| 73.6459          | 410.0000       |            |
| 73.6661          | 386.0000       |            |
| 73.6864          | 432.0000       |            |
| 73.7066          | 427.0000       |            |
| 73.7268          | 426.0000       |            |
| 73.7470          | 428.0000       |            |
| 73.7672          | 413.0000       |            |
| 73.7874          | 431.0000       |            |
| 73.8076          | 458.0000       |            |
| 73.8279          | 414.0000       |            |
| 73.8481          | 424.0000       |            |
| 73.8683          | 432.0000       |            |
| 73.8885          | 416.0000       |            |
| 73.9087          | 399.0000       |            |
| 73.9289          | 400.0000       |            |
| 73.9491          | 414.0000       |            |
| 73.9694          | 399.0000       |            |
| 73.9896          | 420.0000       |            |
| 74.0098          | 440.0000       |            |
| 74.0300          | 411.0000       |            |
| 74.0502          | 420.0000       |            |
| 74.0704          | 373.0000       |            |
| 74.0906          | 420.0000       |            |
| 74.1109          | 419.0000       |            |
| 74.1311          | 388.0000       |            |
| 74.1513          | 427.0000       |            |
| 74.1715          | 414.0000       |            |
| 74.1917          | 387.0000       |            |
| 74.2119          | 397.0000       |            |
| 74.2321          | 421.0000       |            |
| 74.2524          | 435.0000       |            |
| 74.2726          | 404.0000       |            |
| 74.2928          | 414.0000       |            |
| 74.3130          | 408.0000       |            |
| 74.3332          | 375.0000       |            |
| 74.3534          | 396.0000       |            |
| 74.3736          | 421.0000       |            |
| 74.3939          | 416.0000       |            |
| 74.4141          | 434.0000       |            |
| 74.4343          | 418.0000       |            |
| 74.4545          | 394.0000       |            |
| 74.4747          | 432.0000       |            |
| 74.4949          | 381.0000       |            |
| 74.5151          | 390.0000       |            |
| 74.5354          | 421.0000       |            |
| 74.5556          | 408.0000       |            |
| 74.5758          | 382.0000       |            |
| 74.5960          | 377.0000       |            |
| 74.6162          | 441.0000       |            |
| 74.6364          | 432.0000       |            |
| 74.6566          | 388.0000       |            |
| 74.6769          | 382.0000       |            |
| 74.6971          | 401.0000       |            |
| 74.7173          | 388.0000       |            |

| Dec 04, 14 17:43 | Na2TeC2-xy.txt | Page 51/69 |
|------------------|----------------|------------|
| 74.7375          | 406.0000       |            |
| 74.7577          | 440.0000       |            |
| 74.7779          | 434.0000       |            |
| 74.7981          | 430.0000       |            |
| 74.8184          | 426.0000       |            |
| 74.8386          | 375.0000       |            |
| 74.8588          | 401.0000       |            |
| 74.8790          | 410.0000       |            |
| 74.8992          | 424.0000       |            |
| 74.9194          | 397.0000       |            |
| 74.9396          | 376.0000       |            |
| 74.9599          | 400.0000       |            |
| 74.9801          | 382.0000       |            |
| 75.0003          | 401.0000       |            |
| 75.0205          | 393.0000       |            |
| 75.0407          | 419.0000       |            |
| 75.0609          | 396.0000       |            |
| 75.0811          | 423.0000       |            |
| 75.1014          | 402.0000       |            |
| 75.1216          | 371.0000       |            |
| 75.1418          | 384.0000       |            |
| 75.1620          | 369.0000       |            |
| 75.1822          | 391.0000       |            |
| 75.2024          | 389.0000       |            |
| 75.2226          | 375.0000       |            |
| 75.2429          | 414.0000       |            |
| 75.2631          | 375.0000       |            |
| 75.2833          | 424.0000       |            |
| 75.3035          | 417.0000       |            |
| 75.3237          | 375.0000       |            |
| 75.3439          | 414.0000       |            |
| 75.3641          | 416.0000       |            |
| 75.3844          | 378.0000       |            |
| 75.4046          | 371.0000       |            |
| 75.4248          | 366.0000       |            |
| 75.4450          | 410.0000       |            |
| 75.4652          | 406.0000       |            |
| 75.4854          | 382.0000       |            |
| 75.5056          | 383.0000       |            |
| 75.5259          | 396.0000       |            |
| 75.5461          | 421.0000       |            |
| 75.5663          | 387.0000       |            |
| 75.5865          | 404.0000       |            |
| 75.6067          | 401.0000       |            |
| 75.6269          | 397.0000       |            |
| 75.6471          | 412.0000       |            |
| 75.6674          | 369.0000       |            |
| 75.6876          | 402.0000       |            |
| 75.7078          | 370.0000       |            |
| 75.7280          | 398.0000       |            |
| 75.7482          | 366.0000       |            |
| 75.7684          | 407.0000       |            |
| 75.7886          | 379.0000       |            |
| 75.8089          | 368.0000       |            |
| 75.8291          | 364.0000       |            |
| 75.8493          | 398.0000       |            |
| 75.8695          | 362.0000       |            |
| 75.8897          | 390.0000       |            |
| 75.9099          | 395.0000       |            |
| 75.9301          | 385.0000       |            |
| 75.9504          | 384.0000       |            |
| 75.9706          | 383.0000       |            |
| 75.9908          | 417.0000       |            |
| 76.0110          | 404.0000       |            |
| 76.0312          | 376.0000       |            |
| 76.0514          | 376.0000       |            |
| 76.0717          | 427.0000       |            |
| 76.0919          | 389.0000       |            |
| 76.1121          | 377.0000       |            |

| Dec 04, 14 17:43 | Na2TeC2-xy.txt | Page 52/69 |
|------------------|----------------|------------|
| 76.1323          | 400.0000       |            |
| 76.1525          | 400.0000       |            |
| 76.1727          | 389.0000       |            |
| 76.1929          | 368.0000       |            |
| 76.2132          | 357.0000       |            |
| 76.2334          | 408.0000       |            |
| 76.2536          | 417.0000       |            |
| 76.2738          | 413.0000       |            |
| 76.2940          | 377.0000       |            |
| 76.3142          | 383.0000       |            |
| 76.3344          | 415.0000       |            |
| 76.3547          | 392.0000       |            |
| 76.3749          | 412.0000       |            |
| 76.3951          | 373.0000       |            |
| 76.4153          | 368.0000       |            |
| 76.4355          | 358.0000       |            |
| 76.4557          | 382.0000       |            |
| 76.4759          | 356.0000       |            |
| 76.4962          | 393.0000       |            |
| 76.5164          | 371.0000       |            |
| 76.5366          | 375.0000       |            |
| 76.5568          | 370.0000       |            |
| 76.5770          | 346.0000       |            |
| 76.5972          | 409.0000       |            |
| 76.6174          | 356.0000       |            |
| 76.6377          | 362.0000       |            |
| 76.6579          | 426.0000       |            |
| 76.6781          | 347.0000       |            |
| 76.6983          | 379.0000       |            |
| 76.7185          | 363.0000       |            |
| 76.7387          | 391.0000       |            |
| 76.7589          | 366.0000       |            |
| 76.7792          | 369.0000       |            |
| 76.7994          | 358.0000       |            |
| 76.8196          | 368.0000       |            |
| 76.8398          | 372.0000       |            |
| 76.8600          | 381.0000       |            |
| 76.8802          | 385.0000       |            |
| 76.9004          | 380.0000       |            |
| 76.9207          | 330.0000       |            |
| 76.9409          | 381.0000       |            |
| 76.9611          | 356.0000       |            |
| 76.9813          | 361.0000       |            |
| 77.0015          | 366.0000       |            |
| 77.0217          | 376.0000       |            |
| 77.0419          | 396.0000       |            |
| 77.0622          | 370.0000       |            |
| 77.0824          | 374.0000       |            |
| 77.1026          | 384.0000       |            |
| 77.1228          | 350.0000       |            |
| 77.1430          | 410.0000       |            |
| 77.1632          | 382.0000       |            |
| 77.1834          | 363.0000       |            |
| 77.2037          | 374.0000       |            |
| 77.2239          | 362.0000       |            |
| 77.2441          | 407.0000       |            |
| 77.2643          | 408.0000       |            |
| 77.2845          | 372.0000       |            |
| 77.3047          | 408.0000       |            |
| 77.3249          | 355.0000       |            |
| 77.3452          | 393.0000       |            |
| 77.3654          | 376.0000       |            |
| 77.3856          | 396.0000       |            |
| 77.4058          | 334.0000       |            |
| 77.4260          | 347.0000       |            |
| 77.4462          | 362.0000       |            |
| 77.4664          | 361.0000       |            |
| 77.4867          | 375.0000       |            |
| 77.5069          | 358.0000       |            |

| Dec 04, 14 17:43 | Na2TeC2-xy.txt | Page 53/69 |
|------------------|----------------|------------|
| 77.5271          | 326.0000       |            |
| 77.5473          | 357.0000       |            |
| 77.5675          | 377.0000       |            |
| 77.5877          | 391.0000       |            |
| 77.6079          | 358.0000       |            |
| 77.6282          | 370.0000       |            |
| 77.6484          | 367.0000       |            |
| 77.6686          | 386.0000       |            |
| 77.6888          | 349.0000       |            |
| 77.7090          | 392.0000       |            |
| 77.7292          | 379.0000       |            |
| 77.7494          | 342.0000       |            |
| 77.7697          | 398.0000       |            |
| 77.7899          | 350.0000       |            |
| 77.8101          | 370.0000       |            |
| 77.8303          | 356.0000       |            |
| 77.8505          | 385.0000       |            |
| 77.8707          | 383.0000       |            |
| 77.8909          | 389.0000       |            |
| 77.9112          | 369.0000       |            |
| 77.9314          | 380.0000       |            |
| 77.9516          | 338.0000       |            |
| 77.9718          | 382.0000       |            |
| 77.9920          | 342.0000       |            |
| 78.0122          | 396.0000       |            |
| 78.0324          | 347.0000       |            |
| 78.0527          | 354.0000       |            |
| 78.0729          | 361.0000       |            |
| 78.0931          | 355.0000       |            |
| 78.1133          | 348.0000       |            |
| 78.1335          | 370.0000       |            |
| 78.1537          | 359.0000       |            |
| 78.1739          | 390.0000       |            |
| 78.1942          | 362.0000       |            |
| 78.2144          | 339.0000       |            |
| 78.2346          | 357.0000       |            |
| 78.2548          | 358.0000       |            |
| 78.2750          | 364.0000       |            |
| 78.2952          | 336.0000       |            |
| 78.3154          | 398.0000       |            |
| 78.3357          | 352.0000       |            |
| 78.3559          | 360.0000       |            |
| 78.3761          | 369.0000       |            |
| 78.3963          | 341.0000       |            |
| 78.4165          | 353.0000       |            |
| 78.4367          | 367.0000       |            |
| 78.4569          | 363.0000       |            |
| 78.4772          | 367.0000       |            |
| 78.4974          | 312.0000       |            |
| 78.5176          | 353.0000       |            |
| 78.5378          | 347.0000       |            |
| 78.5580          | 347.0000       |            |
| 78.5782          | 386.0000       |            |
| 78.5985          | 399.0000       |            |
| 78.6187          | 350.0000       |            |
| 78.6389          | 349.0000       |            |
| 78.6591          | 349.0000       |            |
| 78.6793          | 338.0000       |            |
| 78.6995          | 356.0000       |            |
| 78.7197          | 345.0000       |            |
| 78.7400          | 346.0000       |            |
| 78.7602          | 361.0000       |            |
| 78.7804          | 340.0000       |            |
| 78.8006          | 328.0000       |            |
| 78.8208          | 338.0000       |            |
| 78.8410          | 369.0000       |            |
| 78.8612          | 367.0000       |            |
| 78.8815          | 327.0000       |            |
| 78.9017          | 354.0000       |            |

| Dec 04, 14 17:43 | Na2TeC2-xy.txt | Page 54/69 |
|------------------|----------------|------------|
| 78.9219          | 363.0000       |            |
| 78.9421          | 347.0000       |            |
| 78.9623          | 350.0000       |            |
| 78.9825          | 344.0000       |            |
| 79.0027          | 331.0000       |            |
| 79.0230          | 348.0000       |            |
| 79.0432          | 349.0000       |            |
| 79.0634          | 316.0000       |            |
| 79.0836          | 350.0000       |            |
| 79.1038          | 331.0000       |            |
| 79.1240          | 347.0000       |            |
| 79.1442          | 364.0000       |            |
| 79.1645          | 355.0000       |            |
| 79.1847          | 334.0000       |            |
| 79.2049          | 346.0000       |            |
| 79.2251          | 346.0000       |            |
| 79.2453          | 329.0000       |            |
| 79.2655          | 356.0000       |            |
| 79.2857          | 353.0000       |            |
| 79.3060          | 342.0000       |            |
| 79.3262          | 346.0000       |            |
| 79.3464          | 327.0000       |            |
| 79.3666          | 307.0000       |            |
| 79.3868          | 320.0000       |            |
| 79.4070          | 326.0000       |            |
| 79.4272          | 294.0000       |            |
| 79.4475          | 341.0000       |            |
| 79.4677          | 371.0000       |            |
| 79.4879          | 340.0000       |            |
| 79.5081          | 343.0000       |            |
| 79.5283          | 305.0000       |            |
| 79.5485          | 348.0000       |            |
| 79.5687          | 356.0000       |            |
| 79.5890          | 300.0000       |            |
| 79.6092          | 391.0000       |            |
| 79.6294          | 318.0000       |            |
| 79.6496          | 357.0000       |            |
| 79.6698          | 350.0000       |            |
| 79.6900          | 333.0000       |            |
| 79.7102          | 308.0000       |            |
| 79.7305          | 353.0000       |            |
| 79.7507          | 315.0000       |            |
| 79.7709          | 327.0000       |            |
| 79.7911          | 336.0000       |            |
| 79.8113          | 363.0000       |            |
| 79.8315          | 354.0000       |            |
| 79.8517          | 348.0000       |            |
| 79.8720          | 338.0000       |            |
| 79.8922          | 346.0000       |            |
| 79.9124          | 335.0000       |            |
| 79.9326          | 333.0000       |            |
| 79.9528          | 310.0000       |            |
| 79.9730          | 312.0000       |            |
| 79.9932          | 367.0000       |            |
| 80.0135          | 344.0000       |            |
| 80.0337          | 339.0000       |            |
| 80.0539          | 328.0000       |            |
| 80.0741          | 337.0000       |            |
| 80.0943          | 329.0000       |            |
| 80.1145          | 341.0000       |            |
| 80.1347          | 347.0000       |            |
| 80.1550          | 309.0000       |            |
| 80.1752          | 330.0000       |            |
| 80.1954          | 320.0000       |            |
| 80.2156          | 299.0000       |            |
| 80.2358          | 330.0000       |            |
| 80.2560          | 358.0000       |            |
| 80.2762          | 363.0000       |            |
| 80.2965          | 346.0000       |            |

| Dec 04, 14 17:43 | Na2TeC2-xy.txt | Page 55/69 |
|------------------|----------------|------------|
| 80.3167          | 335.0000       |            |
| 80.3369          | 337.0000       |            |
| 80.3571          | 320.0000       |            |
| 80.3773          | 338.0000       |            |
| 80.3975          | 344.0000       |            |
| 80.4177          | 339.0000       |            |
| 80.4380          | 321.0000       |            |
| 80.4582          | 328.0000       |            |
| 80.4784          | 326.0000       |            |
| 80.4986          | 336.0000       |            |
| 80.5188          | 295.0000       |            |
| 80.5390          | 310.0000       |            |
| 80.5592          | 333.0000       |            |
| 80.5795          | 351.0000       |            |
| 80.5997          | 336.0000       |            |
| 80.6199          | 335.0000       |            |
| 80.6401          | 309.0000       |            |
| 80.6603          | 304.0000       |            |
| 80.6805          | 304.0000       |            |
| 80.7007          | 343.0000       |            |
| 80.7210          | 334.0000       |            |
| 80.7412          | 335.0000       |            |
| 80.7614          | 333.0000       |            |
| 80.7816          | 329.0000       |            |
| 80.8018          | 298.0000       |            |
| 80.8220          | 327.0000       |            |
| 80.8422          | 306.0000       |            |
| 80.8625          | 319.0000       |            |
| 80.8827          | 325.0000       |            |
| 80.9029          | 320.0000       |            |
| 80.9231          | 305.0000       |            |
| 80.9433          | 325.0000       |            |
| 80.9635          | 335.0000       |            |
| 80.9837          | 341.0000       |            |
| 81.0040          | 293.0000       |            |
| 81.0242          | 315.0000       |            |
| 81.0444          | 351.0000       |            |
| 81.0646          | 326.0000       |            |
| 81.0848          | 278.0000       |            |
| 81.1050          | 319.0000       |            |
| 81.1253          | 318.0000       |            |
| 81.1455          | 327.0000       |            |
| 81.1657          | 316.0000       |            |
| 81.1859          | 301.0000       |            |
| 81.2061          | 307.0000       |            |
| 81.2263          | 323.0000       |            |
| 81.2465          | 312.0000       |            |
| 81.2668          | 279.0000       |            |
| 81.2870          | 318.0000       |            |
| 81.3072          | 316.0000       |            |
| 81.3274          | 304.0000       |            |
| 81.3476          | 313.0000       |            |
| 81.3678          | 279.0000       |            |
| 81.3880          | 290.0000       |            |
| 81.4083          | 288.0000       |            |
| 81.4285          | 278.0000       |            |
| 81.4487          | 268.0000       |            |
| 81.4689          | 286.0000       |            |
| 81.4891          | 308.0000       |            |
| 81.5093          | 323.0000       |            |
| 81.5295          | 311.0000       |            |
| 81.5498          | 314.0000       |            |
| 81.5700          | 292.0000       |            |
| 81.5902          | 299.0000       |            |
| 81.6104          | 318.0000       |            |
| 81.6306          | 293.0000       |            |
| 81.6508          | 276.0000       |            |
| 81.6710          | 261.0000       |            |
| 81.6913          | 310.0000       |            |

| Dec 04, 14 17:43 | Na2TeC2-xy.txt | Page 56/69 |
|------------------|----------------|------------|
| 81.7115          | 308.0000       |            |
| 81.7317          | 311.0000       |            |
| 81.7519          | 307.0000       |            |
| 81.7721          | 304.0000       |            |
| 81.7923          | 290.0000       |            |
| 81.8125          | 286.0000       |            |
| 81.8328          | 312.0000       |            |
| 81.8530          | 309.0000       |            |
| 81.8732          | 304.0000       |            |
| 81.8934          | 308.0000       |            |
| 81.9136          | 262.0000       |            |
| 81.9338          | 307.0000       |            |
| 81.9540          | 322.0000       |            |
| 81.9743          | 289.0000       |            |
| 81.9945          | 278.0000       |            |
| 82.0147          | 308.0000       |            |
| 82.0349          | 273.0000       |            |
| 82.0551          | 303.0000       |            |
| 82.0753          | 294.0000       |            |
| 82.0955          | 290.0000       |            |
| 82.1158          | 294.0000       |            |
| 82.1360          | 284.0000       |            |
| 82.1562          | 275.0000       |            |
| 82.1764          | 271.0000       |            |
| 82.1966          | 292.0000       |            |
| 82.2168          | 283.0000       |            |
| 82.2370          | 292.0000       |            |
| 82.2573          | 308.0000       |            |
| 82.2775          | 320.0000       |            |
| 82.2977          | 285.0000       |            |
| 82.3179          | 296.0000       |            |
| 82.3381          | 288.0000       |            |
| 82.3583          | 274.0000       |            |
| 82.3785          | 284.0000       |            |
| 82.3988          | 283.0000       |            |
| 82.4190          | 289.0000       |            |
| 82.4392          | 321.0000       |            |
| 82.4594          | 297.0000       |            |
| 82.4796          | 263.0000       |            |
| 82.4998          | 324.0000       |            |
| 82.5200          | 288.0000       |            |
| 82.5403          | 301.0000       |            |
| 82.5605          | 281.0000       |            |
| 82.5807          | 263.0000       |            |
| 82.6009          | 318.0000       |            |
| 82.6211          | 263.0000       |            |
| 82.6413          | 291.0000       |            |
| 82.6615          | 293.0000       |            |
| 82.6818          | 291.0000       |            |
| 82.7020          | 302.0000       |            |
| 82.7222          | 284.0000       |            |
| 82.7424          | 282.0000       |            |
| 82.7626          | 264.0000       |            |
| 82.7828          | 270.0000       |            |
| 82.8030          | 271.0000       |            |
| 82.8233          | 276.0000       |            |
| 82.8435          | 239.0000       |            |
| 82.8637          | 280.0000       |            |
| 82.8839          | 265.0000       |            |
| 82.9041          | 292.0000       |            |
| 82.9243          | 287.0000       |            |
| 82.9445          | 286.0000       |            |
| 82.9648          | 278.0000       |            |
| 82.9850          | 286.0000       |            |
| 83.0052          | 279.0000       |            |
| 83.0254          | 282.0000       |            |
| 83.0456          | 274.0000       |            |
| 83.0658          | 278.0000       |            |
| 83.0860          | 283.0000       |            |

| Dec 04, 14 17:43 | Na2TeC2-xy.txt | Page 57/69 |
|------------------|----------------|------------|
| 83.1063          | 309.0000       |            |
| 83.1265          | 320.0000       |            |
| 83.1467          | 315.0000       |            |
| 83.1669          | 270.0000       |            |
| 83.1871          | 292.0000       |            |
| 83.2073          | 275.0000       |            |
| 83.2275          | 277.0000       |            |
| 83.2478          | 289.0000       |            |
| 83.2680          | 269.0000       |            |
| 83.2882          | 281.0000       |            |
| 83.3084          | 289.0000       |            |
| 83.3286          | 280.0000       |            |
| 83.3488          | 302.0000       |            |
| 83.3690          | 313.0000       |            |
| 83.3893          | 267.0000       |            |
| 83.4095          | 266.0000       |            |
| 83.4297          | 305.0000       |            |
| 83.4499          | 271.0000       |            |
| 83.4701          | 270.0000       |            |
| 83.4903          | 282.0000       |            |
| 83.5105          | 272.0000       |            |
| 83.5308          | 288.0000       |            |
| 83.5510          | 286.0000       |            |
| 83.5712          | 256.0000       |            |
| 83.5914          | 293.0000       |            |
| 83.6116          | 271.0000       |            |
| 83.6318          | 313.0000       |            |
| 83.6521          | 289.0000       |            |
| 83.6723          | 256.0000       |            |
| 83.6925          | 274.0000       |            |
| 83.7127          | 308.0000       |            |
| 83.7329          | 294.0000       |            |
| 83.7531          | 279.0000       |            |
| 83.7733          | 298.0000       |            |
| 83.7936          | 300.0000       |            |
| 83.8138          | 267.0000       |            |
| 83.8340          | 255.0000       |            |
| 83.8542          | 251.0000       |            |
| 83.8744          | 266.0000       |            |
| 83.8946          | 278.0000       |            |
| 83.9148          | 270.0000       |            |
| 83.9351          | 255.0000       |            |
| 83.9553          | 298.0000       |            |
| 83.9755          | 274.0000       |            |
| 83.9957          | 248.0000       |            |
| 84.0159          | 259.0000       |            |
| 84.0361          | 261.0000       |            |
| 84.0563          | 255.0000       |            |
| 84.0766          | 276.0000       |            |
| 84.0968          | 286.0000       |            |
| 84.1170          | 254.0000       |            |
| 84.1372          | 265.0000       |            |
| 84.1574          | 279.0000       |            |
| 84.1776          | 277.0000       |            |
| 84.1978          | 280.0000       |            |
| 84.2181          | 285.0000       |            |
| 84.2383          | 237.0000       |            |
| 84.2585          | 260.0000       |            |
| 84.2787          | 259.0000       |            |
| 84.2989          | 285.0000       |            |
| 84.3191          | 292.0000       |            |
| 84.3393          | 265.0000       |            |
| 84.3596          | 271.0000       |            |
| 84.3798          | 281.0000       |            |
| 84.4000          | 273.0000       |            |
| 84.4202          | 262.0000       |            |
| 84.4404          | 258.0000       |            |
| 84.4606          | 265.0000       |            |
| 84.4808          | 240.0000       |            |

| Dec 04, 14 17:43 | Na2TeC2-xy.txt | Page 58/69 |
|------------------|----------------|------------|
| 84.5011          | 289.0000       |            |
| 84.5213          | 246.0000       |            |
| 84.5415          | 251.0000       |            |
| 84.5617          | 288.0000       |            |
| 84.5819          | 244.0000       |            |
| 84.6021          | 245.0000       |            |
| 84.6223          | 276.0000       |            |
| 84.6426          | 261.0000       |            |
| 84.6628          | 277.0000       |            |
| 84.6830          | 269.0000       |            |
| 84.7032          | 277.0000       |            |
| 84.7234          | 269.0000       |            |
| 84.7436          | 266.0000       |            |
| 84.7638          | 280.0000       |            |
| 84.7841          | 263.0000       |            |
| 84.8043          | 272.0000       |            |
| 84.8245          | 263.0000       |            |
| 84.8447          | 251.0000       |            |
| 84.8649          | 259.0000       |            |
| 84.8851          | 265.0000       |            |
| 84.9053          | 258.0000       |            |
| 84.9256          | 260.0000       |            |
| 84.9458          | 230.0000       |            |
| 84.9660          | 298.0000       |            |
| 84.9862          | 260.0000       |            |
| 85.0064          | 225.0000       |            |
| 85.0266          | 240.0000       |            |
| 85.0468          | 271.0000       |            |
| 85.0671          | 265.0000       |            |
| 85.0873          | 277.0000       |            |
| 85.1075          | 262.0000       |            |
| 85.1277          | 230.0000       |            |
| 85.1479          | 279.0000       |            |
| 85.1681          | 261.0000       |            |
| 85.1883          | 258.0000       |            |
| 85.2086          | 243.0000       |            |
| 85.2288          | 253.0000       |            |
| 85.2490          | 254.0000       |            |
| 85.2692          | 280.0000       |            |
| 85.2894          | 257.0000       |            |
| 85.3096          | 251.0000       |            |
| 85.3298          | 276.0000       |            |
| 85.3501          | 268.0000       |            |
| 85.3703          | 258.0000       |            |
| 85.3905          | 250.0000       |            |
| 85.4107          | 228.0000       |            |
| 85.4309          | 277.0000       |            |
| 85.4511          | 255.0000       |            |
| 85.4713          | 248.0000       |            |
| 85.4916          | 263.0000       |            |
| 85.5118          | 285.0000       |            |
| 85.5320          | 277.0000       |            |
| 85.5522          | 245.0000       |            |
| 85.5724          | 260.0000       |            |
| 85.5926          | 275.0000       |            |
| 85.6128          | 234.0000       |            |
| 85.6331          | 263.0000       |            |
| 85.6533          | 267.0000       |            |
| 85.6735          | 256.0000       |            |
| 85.6937          | 266.0000       |            |
| 85.7139          | 273.0000       |            |
| 85.7341          | 237.0000       |            |
| 85.7543          | 284.0000       |            |
| 85.7746          | 229.0000       |            |
| 85.7948          | 267.0000       |            |
| 85.8150          | 257.0000       |            |
| 85.8352          | 292.0000       |            |
| 85.8554          | 223.0000       |            |
| 85.8756          | 220.0000       |            |

| Dec 04, 14 17:43 | Na2TeC2-xy.txt | Page 59/69 |
|------------------|----------------|------------|
| 85.8958          | 244.0000       |            |
| 85.9161          | 264.0000       |            |
| 85.9363          | 246.0000       |            |
| 85.9565          | 263.0000       |            |
| 85.9767          | 268.0000       |            |
| 85.9969          | 260.0000       |            |
| 86.0171          | 254.0000       |            |
| 86.0373          | 248.0000       |            |
| 86.0576          | 276.0000       |            |
| 86.0778          | 270.0000       |            |
| 86.0980          | 233.0000       |            |
| 86.1182          | 227.0000       |            |
| 86.1384          | 242.0000       |            |
| 86.1586          | 245.0000       |            |
| 86.1789          | 222.0000       |            |
| 86.1991          | 248.0000       |            |
| 86.2193          | 250.0000       |            |
| 86.2395          | 262.0000       |            |
| 86.2597          | 262.0000       |            |
| 86.2799          | 276.0000       |            |
| 86.3001          | 249.0000       |            |
| 86.3204          | 253.0000       |            |
| 86.3406          | 255.0000       |            |
| 86.3608          | 237.0000       |            |
| 86.3810          | 234.0000       |            |
| 86.4012          | 274.0000       |            |
| 86.4214          | 262.0000       |            |
| 86.4416          | 256.0000       |            |
| 86.4619          | 265.0000       |            |
| 86.4821          | 259.0000       |            |
| 86.5023          | 258.0000       |            |
| 86.5225          | 243.0000       |            |
| 86.5427          | 221.0000       |            |
| 86.5629          | 227.0000       |            |
| 86.5831          | 261.0000       |            |
| 86.6034          | 244.0000       |            |
| 86.6236          | 266.0000       |            |
| 86.6438          | 235.0000       |            |
| 86.6640          | 265.0000       |            |
| 86.6842          | 255.0000       |            |
| 86.7044          | 265.0000       |            |
| 86.7246          | 277.0000       |            |
| 86.7449          | 260.0000       |            |
| 86.7651          | 256.0000       |            |
| 86.7853          | 257.0000       |            |
| 86.8055          | 278.0000       |            |
| 86.8257          | 276.0000       |            |
| 86.8459          | 283.0000       |            |
| 86.8661          | 257.0000       |            |
| 86.8864          | 253.0000       |            |
| 86.9066          | 278.0000       |            |
| 86.9268          | 234.0000       |            |
| 86.9470          | 247.0000       |            |
| 86.9672          | 284.0000       |            |
| 86.9874          | 223.0000       |            |
| 87.0076          | 242.0000       |            |
| 87.0279          | 247.0000       |            |
| 87.0481          | 262.0000       |            |
| 87.0683          | 249.0000       |            |
| 87.0885          | 250.0000       |            |
| 87.1087          | 270.0000       |            |
| 87.1289          | 239.0000       |            |
| 87.1491          | 241.0000       |            |
| 87.1694          | 234.0000       |            |
| 87.1896          | 262.0000       |            |
| 87.2098          | 220.0000       |            |
| 87.2300          | 250.0000       |            |
| 87.2502          | 234.0000       |            |
| 87.2704          | 237.0000       |            |

| Dec 04, 14 17:43 | Na2TeC2-xy.txt | Page 60/69 |
|------------------|----------------|------------|
| 87.2906          | 262.0000       |            |
| 87.3109          | 240.0000       |            |
| 87.3311          | 241.0000       |            |
| 87.3513          | 264.0000       |            |
| 87.3715          | 266.0000       |            |
| 87.3917          | 278.0000       |            |
| 87.4119          | 285.0000       |            |
| 87.4321          | 232.0000       |            |
| 87.4524          | 242.0000       |            |
| 87.4726          | 254.0000       |            |
| 87.4928          | 254.0000       |            |
| 87.5130          | 255.0000       |            |
| 87.5332          | 255.0000       |            |
| 87.5534          | 257.0000       |            |
| 87.5736          | 247.0000       |            |
| 87.5939          | 245.0000       |            |
| 87.6141          | 242.0000       |            |
| 87.6343          | 256.0000       |            |
| 87.6545          | 252.0000       |            |
| 87.6747          | 241.0000       |            |
| 87.6949          | 245.0000       |            |
| 87.7151          | 237.0000       |            |
| 87.7354          | 254.0000       |            |
| 87.7556          | 268.0000       |            |
| 87.7758          | 222.0000       |            |
| 87.7960          | 227.0000       |            |
| 87.8162          | 248.0000       |            |
| 87.8364          | 230.0000       |            |
| 87.8566          | 226.0000       |            |
| 87.8769          | 226.0000       |            |
| 87.8971          | 254.0000       |            |
| 87.9173          | 256.0000       |            |
| 87.9375          | 282.0000       |            |
| 87.9577          | 267.0000       |            |
| 87.9779          | 269.0000       |            |
| 87.9981          | 256.0000       |            |
| 88.0184          | 242.0000       |            |
| 88.0386          | 279.0000       |            |
| 88.0588          | 240.0000       |            |
| 88.0790          | 230.0000       |            |
| 88.0992          | 273.0000       |            |
| 88.1194          | 222.0000       |            |
| 88.1396          | 244.0000       |            |
| 88.1599          | 255.0000       |            |
| 88.1801          | 244.0000       |            |
| 88.2003          | 274.0000       |            |
| 88.2205          | 252.0000       |            |
| 88.2407          | 247.0000       |            |
| 88.2609          | 248.0000       |            |
| 88.2811          | 230.0000       |            |
| 88.3014          | 247.0000       |            |
| 88.3216          | 286.0000       |            |
| 88.3418          | 203.0000       |            |
| 88.3620          | 225.0000       |            |
| 88.3822          | 251.0000       |            |
| 88.4024          | 237.0000       |            |
| 88.4226          | 263.0000       |            |
| 88.4429          | 240.0000       |            |
| 88.4631          | 278.0000       |            |
| 88.4833          | 242.0000       |            |
| 88.5035          | 227.0000       |            |
| 88.5237          | 266.0000       |            |
| 88.5439          | 255.0000       |            |
| 88.5641          | 246.0000       |            |
| 88.5844          | 243.0000       |            |
| 88.6046          | 266.0000       |            |
| 88.6248          | 284.0000       |            |
| 88.6450          | 260.0000       |            |
| 88.6652          | 274.0000       |            |

| Dec 04, 14 17:43 | Na2TeC2-xy.txt | Page 61/69 |
|------------------|----------------|------------|
| 88.6854          | 231.0000       |            |
| 88.7057          | 249.0000       |            |
| 88.7259          | 233.0000       |            |
| 88.7461          | 261.0000       |            |
| 88.7663          | 251.0000       |            |
| 88.7865          | 246.0000       |            |
| 88.8067          | 260.0000       |            |
| 88.8269          | 252.0000       |            |
| 88.8472          | 264.0000       |            |
| 88.8674          | 241.0000       |            |
| 88.8876          | 251.0000       |            |
| 88.9078          | 272.0000       |            |
| 88.9280          | 265.0000       |            |
| 88.9482          | 252.0000       |            |
| 88.9684          | 241.0000       |            |
| 88.9887          | 233.0000       |            |
| 89.0089          | 240.0000       |            |
| 89.0291          | 250.0000       |            |
| 89.0493          | 246.0000       |            |
| 89.0695          | 251.0000       |            |
| 89.0897          | 258.0000       |            |
| 89.1099          | 267.0000       |            |
| 89.1302          | 230.0000       |            |
| 89.1504          | 228.0000       |            |
| 89.1706          | 247.0000       |            |
| 89.1908          | 284.0000       |            |
| 89.2110          | 283.0000       |            |
| 89.2312          | 231.0000       |            |
| 89.2514          | 254.0000       |            |
| 89.2717          | 252.0000       |            |
| 89.2919          | 246.0000       |            |
| 89.3121          | 224.0000       |            |
| 89.3323          | 254.0000       |            |
| 89.3525          | 248.0000       |            |
| 89.3727          | 227.0000       |            |
| 89.3929          | 219.0000       |            |
| 89.4132          | 247.0000       |            |
| 89.4334          | 228.0000       |            |
| 89.4536          | 261.0000       |            |
| 89.4738          | 255.0000       |            |
| 89.4940          | 271.0000       |            |
| 89.5142          | 250.0000       |            |
| 89.5344          | 244.0000       |            |
| 89.5547          | 259.0000       |            |
| 89.5749          | 256.0000       |            |
| 89.5951          | 262.0000       |            |
| 89.6153          | 244.0000       |            |
| 89.6355          | 248.0000       |            |
| 89.6557          | 251.0000       |            |
| 89.6759          | 234.0000       |            |
| 89.6962          | 245.0000       |            |
| 89.7164          | 264.0000       |            |
| 89.7366          | 284.0000       |            |
| 89.7568          | 258.0000       |            |
| 89.7770          | 282.0000       |            |
| 89.7972          | 252.0000       |            |
| 89.8174          | 272.0000       |            |
| 89.8377          | 278.0000       |            |
| 89.8579          | 247.0000       |            |
| 89.8781          | 275.0000       |            |
| 89.8983          | 244.0000       |            |
| 89.9185          | 268.0000       |            |
| 89.9387          | 253.0000       |            |
| 89.9589          | 251.0000       |            |
| 89.9792          | 239.0000       |            |
| 89.9994          | 259.0000       |            |
| 90.0196          | 253.0000       |            |
| 90.0398          | 244.0000       |            |
| 90.0600          | 250.0000       |            |

| Dec 04, 14 17:43 | Na2TeC2-xy.txt | Page 62/69 |
|------------------|----------------|------------|
| 90.0802          | 259.0000       |            |
| 90.1004          | 270.0000       |            |
| 90.1207          | 242.0000       |            |
| 90.1409          | 221.0000       |            |
| 90.1611          | 285.0000       |            |
| 90.1813          | 271.0000       |            |
| 90.2015          | 277.0000       |            |
| 90.2217          | 260.0000       |            |
| 90.2419          | 248.0000       |            |
| 90.2622          | 264.0000       |            |
| 90.2824          | 227.0000       |            |
| 90.3026          | 232.0000       |            |
| 90.3228          | 228.0000       |            |
| 90.3430          | 256.0000       |            |
| 90.3632          | 262.0000       |            |
| 90.3834          | 267.0000       |            |
| 90.4037          | 236.0000       |            |
| 90.4239          | 250.0000       |            |
| 90.4441          | 260.0000       |            |
| 90.4643          | 266.0000       |            |
| 90.4845          | 259.0000       |            |
| 90.5047          | 264.0000       |            |
| 90.5249          | 241.0000       |            |
| 90.5452          | 227.0000       |            |
| 90.5654          | 241.0000       |            |
| 90.5856          | 271.0000       |            |
| 90.6058          | 253.0000       |            |
| 90.6260          | 228.0000       |            |
| 90.6462          | 246.0000       |            |
| 90.6664          | 257.0000       |            |
| 90.6867          | 284.0000       |            |
| 90.7069          | 275.0000       |            |
| 90.7271          | 225.0000       |            |
| 90.7473          | 272.0000       |            |
| 90.7675          | 262.0000       |            |
| 90.7877          | 272.0000       |            |
| 90.8079          | 286.0000       |            |
| 90.8282          | 266.0000       |            |
| 90.8484          | 280.0000       |            |
| 90.8686          | 270.0000       |            |
| 90.8888          | 262.0000       |            |
| 90.9090          | 258.0000       |            |
| 90.9292          | 255.0000       |            |
| 90.9494          | 268.0000       |            |
| 90.9697          | 266.0000       |            |
| 90.9899          | 242.0000       |            |
| 91.0101          | 287.0000       |            |
| 91.0303          | 235.0000       |            |
| 91.0505          | 279.0000       |            |
| 91.0707          | 241.0000       |            |
| 91.0909          | 256.0000       |            |
| 91.1112          | 271.0000       |            |
| 91.1314          | 233.0000       |            |
| 91.1516          | 275.0000       |            |
| 91.1718          | 251.0000       |            |
| 91.1920          | 273.0000       |            |
| 91.2122          | 246.0000       |            |
| 91.2325          | 244.0000       |            |
| 91.2527          | 263.0000       |            |
| 91.2729          | 253.0000       |            |
| 91.2931          | 240.0000       |            |
| 91.3133          | 263.0000       |            |
| 91.3335          | 276.0000       |            |
| 91.3537          | 266.0000       |            |
| 91.3740          | 275.0000       |            |
| 91.3942          | 264.0000       |            |
| 91.4144          | 288.0000       |            |
| 91.4346          | 267.0000       |            |
| 91.4548          | 284.0000       |            |

| Dec 04, 14 17:43 | Na2TeC2-xy.txt | Page 63/69 |
|------------------|----------------|------------|
| 91.4750          | 254.0000       |            |
| 91.4952          | 266.0000       |            |
| 91.5155          | 262.0000       |            |
| 91.5357          | 232.0000       |            |
| 91.5559          | 265.0000       |            |
| 91.5761          | 270.0000       |            |
| 91.5963          | 253.0000       |            |
| 91.6165          | 256.0000       |            |
| 91.6367          | 253.0000       |            |
| 91.6570          | 258.0000       |            |
| 91.6772          | 279.0000       |            |
| 91.6974          | 245.0000       |            |
| 91.7176          | 263.0000       |            |
| 91.7378          | 264.0000       |            |
| 91.7580          | 282.0000       |            |
| 91.7782          | 251.0000       |            |
| 91.7985          | 275.0000       |            |
| 91.8187          | 254.0000       |            |
| 91.8389          | 274.0000       |            |
| 91.8591          | 275.0000       |            |
| 91.8793          | 282.0000       |            |
| 91.8995          | 293.0000       |            |
| 91.9197          | 254.0000       |            |
| 91.9400          | 246.0000       |            |
| 91.9602          | 250.0000       |            |
| 91.9804          | 268.0000       |            |
| 92.0006          | 242.0000       |            |
| 92.0208          | 279.0000       |            |
| 92.0410          | 267.0000       |            |
| 92.0612          | 289.0000       |            |
| 92.0815          | 275.0000       |            |
| 92.1017          | 270.0000       |            |
| 92.1219          | 262.0000       |            |
| 92.1421          | 286.0000       |            |
| 92.1623          | 266.0000       |            |
| 92.1825          | 259.0000       |            |
| 92.2027          | 277.0000       |            |
| 92.2230          | 258.0000       |            |
| 92.2432          | 293.0000       |            |
| 92.2634          | 263.0000       |            |
| 92.2836          | 288.0000       |            |
| 92.3038          | 259.0000       |            |
| 92.3240          | 269.0000       |            |
| 92.3442          | 239.0000       |            |
| 92.3645          | 257.0000       |            |
| 92.3847          | 273.0000       |            |
| 92.4049          | 274.0000       |            |
| 92.4251          | 286.0000       |            |
| 92.4453          | 281.0000       |            |
| 92.4655          | 273.0000       |            |
| 92.4857          | 273.0000       |            |
| 92.5060          | 256.0000       |            |
| 92.5262          | 288.0000       |            |
| 92.5464          | 275.0000       |            |
| 92.5666          | 285.0000       |            |
| 92.5868          | 295.0000       |            |
| 92.6070          | 285.0000       |            |
| 92.6272          | 262.0000       |            |
| 92.6475          | 286.0000       |            |
| 92.6677          | 273.0000       |            |
| 92.6879          | 271.0000       |            |
| 92.7081          | 272.0000       |            |
| 92.7283          | 275.0000       |            |
| 92.7485          | 272.0000       |            |
| 92.7687          | 256.0000       |            |
| 92.7890          | 263.0000       |            |
| 92.8092          | 265.0000       |            |
| 92.8294          | 268.0000       |            |
| 92.8496          | 275.0000       |            |

| Dec 04, 14 17:43 | Na2TeC2-xy.txt | Page 64/69 |
|------------------|----------------|------------|
| 92.8698          | 265.0000       |            |
| 92.8900          | 278.0000       |            |
| 92.9102          | 262.0000       |            |
| 92.9305          | 273.0000       |            |
| 92.9507          | 285.0000       |            |
| 92.9709          | 263.0000       |            |
| 92.9911          | 258.0000       |            |
| 93.0113          | 257.0000       |            |
| 93.0315          | 295.0000       |            |
| 93.0517          | 245.0000       |            |
| 93.0720          | 279.0000       |            |
| 93.0922          | 247.0000       |            |
| 93.1124          | 254.0000       |            |
| 93.1326          | 269.0000       |            |
| 93.1528          | 282.0000       |            |
| 93.1730          | 264.0000       |            |
| 93.1932          | 278.0000       |            |
| 93.2135          | 261.0000       |            |
| 93.2337          | 285.0000       |            |
| 93.2539          | 285.0000       |            |
| 93.2741          | 255.0000       |            |
| 93.2943          | 281.0000       |            |
| 93.3145          | 296.0000       |            |
| 93.3347          | 287.0000       |            |
| 93.3550          | 294.0000       |            |
| 93.3752          | 300.0000       |            |
| 93.3954          | 275.0000       |            |
| 93.4156          | 301.0000       |            |
| 93.4358          | 280.0000       |            |
| 93.4560          | 265.0000       |            |
| 93.4762          | 274.0000       |            |
| 93.4965          | 286.0000       |            |
| 93.5167          | 316.0000       |            |
| 93.5369          | 278.0000       |            |
| 93.5571          | 265.0000       |            |
| 93.5773          | 281.0000       |            |
| 93.5975          | 285.0000       |            |
| 93.6177          | 279.0000       |            |
| 93.6380          | 288.0000       |            |
| 93.6582          | 318.0000       |            |
| 93.6784          | 284.0000       |            |
| 93.6986          | 298.0000       |            |
| 93.7188          | 283.0000       |            |
| 93.7390          | 305.0000       |            |
| 93.7593          | 270.0000       |            |
| 93.7795          | 294.0000       |            |
| 93.7997          | 309.0000       |            |
| 93.8199          | 295.0000       |            |
| 93.8401          | 287.0000       |            |
| 93.8603          | 281.0000       |            |
| 93.8805          | 282.0000       |            |
| 93.9008          | 282.0000       |            |
| 93.9210          | 302.0000       |            |
| 93.9412          | 291.0000       |            |
| 93.9614          | 275.0000       |            |
| 93.9816          | 289.0000       |            |
| 94.0018          | 297.0000       |            |
| 94.0220          | 301.0000       |            |
| 94.0423          | 303.0000       |            |
| 94.0625          | 286.0000       |            |
| 94.0827          | 318.0000       |            |
| 94.1029          | 292.0000       |            |
| 94.1231          | 290.0000       |            |
| 94.1433          | 266.0000       |            |
| 94.1635          | 288.0000       |            |
| 94.1838          | 293.0000       |            |
| 94.2040          | 281.0000       |            |
| 94.2242          | 297.0000       |            |
| 94.2444          | 273.0000       |            |



| Dec 04, 14 17:43 | Na2TeC2-xy.txt | Page 65/69 |
|------------------|----------------|------------|
| 94.2646          | 277.0000       |            |
| 94.2848          | 330.0000       |            |
| 94.3050          | 295.0000       |            |
| 94.3253          | 294.0000       |            |
| 94.3455          | 317.0000       |            |
| 94.3657          | 289.0000       |            |
| 94.3859          | 310.0000       |            |
| 94.4061          | 305.0000       |            |
| 94.4263          | 325.0000       |            |
| 94.4465          | 289.0000       |            |
| 94.4668          | 327.0000       |            |
| 94.4870          | 304.0000       |            |
| 94.5072          | 304.0000       |            |
| 94.5274          | 286.0000       |            |
| 94.5476          | 286.0000       |            |
| 94.5678          | 321.0000       |            |
| 94.5880          | 296.0000       |            |
| 94.6083          | 307.0000       |            |
| 94.6285          | 294.0000       |            |
| 94.6487          | 307.0000       |            |
| 94.6689          | 302.0000       |            |
| 94.6891          | 322.0000       |            |
| 94.7093          | 290.0000       |            |
| 94.7295          | 290.0000       |            |
| 94.7498          | 302.0000       |            |
| 94.7700          | 297.0000       |            |
| 94.7902          | 308.0000       |            |
| 94.8104          | 298.0000       |            |
| 94.8306          | 329.0000       |            |
| 94.8508          | 313.0000       |            |
| 94.8710          | 306.0000       |            |
| 94.8913          | 311.0000       |            |
| 94.9115          | 312.0000       |            |
| 94.9317          | 304.0000       |            |
| 94.9519          | 306.0000       |            |
| 94.9721          | 290.0000       |            |
| 94.9923          | 316.0000       |            |
| 95.0125          | 286.0000       |            |
| 95.0328          | 296.0000       |            |
| 95.0530          | 285.0000       |            |
| 95.0732          | 303.0000       |            |
| 95.0934          | 303.0000       |            |
| 95.1136          | 314.0000       |            |
| 95.1338          | 307.0000       |            |
| 95.1540          | 288.0000       |            |
| 95.1743          | 287.0000       |            |
| 95.1945          | 334.0000       |            |
| 95.2147          | 295.0000       |            |
| 95.2349          | 292.0000       |            |
| 95.2551          | 285.0000       |            |
| 95.2753          | 298.0000       |            |
| 95.2955          | 285.0000       |            |
| 95.3158          | 329.0000       |            |
| 95.3360          | 300.0000       |            |
| 95.3562          | 272.0000       |            |
| 95.3764          | 314.0000       |            |
| 95.3966          | 308.0000       |            |
| 95.4168          | 323.0000       |            |
| 95.4370          | 316.0000       |            |
| 95.4573          | 324.0000       |            |
| 95.4775          | 285.0000       |            |
| 95.4977          | 323.0000       |            |
| 95.5179          | 327.0000       |            |
| 95.5381          | 307.0000       |            |
| 95.5583          | 290.0000       |            |
| 95.5785          | 314.0000       |            |
| 95.5988          | 299.0000       |            |
| 95.6190          | 293.0000       |            |
| 95.6392          | 326.0000       |            |

| Dec 04, 14 17:43 | Na2TeC2-xy.txt | Page 66/69 |
|------------------|----------------|------------|
| 95.6594          | 326.0000       |            |
| 95.6796          | 314.0000       |            |
| 95.6998          | 343.0000       |            |
| 95.7200          | 306.0000       |            |
| 95.7403          | 312.0000       |            |
| 95.7605          | 293.0000       |            |
| 95.7807          | 293.0000       |            |
| 95.8009          | 338.0000       |            |
| 95.8211          | 301.0000       |            |
| 95.8413          | 334.0000       |            |
| 95.8615          | 314.0000       |            |
| 95.8818          | 319.0000       |            |
| 95.9020          | 323.0000       |            |
| 95.9222          | 308.0000       |            |
| 95.9424          | 309.0000       |            |
| 95.9626          | 311.0000       |            |
| 95.9828          | 329.0000       |            |
| 96.0030          | 290.0000       |            |
| 96.0233          | 304.0000       |            |
| 96.0435          | 316.0000       |            |
| 96.0637          | 327.0000       |            |
| 96.0839          | 323.0000       |            |
| 96.1041          | 327.0000       |            |
| 96.1243          | 283.0000       |            |
| 96.1445          | 330.0000       |            |
| 96.1648          | 294.0000       |            |
| 96.1850          | 338.0000       |            |
| 96.2052          | 319.0000       |            |
| 96.2254          | 302.0000       |            |
| 96.2456          | 316.0000       |            |
| 96.2658          | 322.0000       |            |
| 96.2861          | 309.0000       |            |
| 96.3063          | 315.0000       |            |
| 96.3265          | 313.0000       |            |
| 96.3467          | 343.0000       |            |
| 96.3669          | 297.0000       |            |
| 96.3871          | 319.0000       |            |
| 96.4073          | 314.0000       |            |
| 96.4276          | 356.0000       |            |
| 96.4478          | 329.0000       |            |
| 96.4680          | 315.0000       |            |
| 96.4882          | 356.0000       |            |
| 96.5084          | 337.0000       |            |
| 96.5286          | 330.0000       |            |
| 96.5488          | 310.0000       |            |
| 96.5691          | 316.0000       |            |
| 96.5893          | 310.0000       |            |
| 96.6095          | 323.0000       |            |
| 96.6297          | 319.0000       |            |
| 96.6499          | 357.0000       |            |
| 96.6701          | 301.0000       |            |
| 96.6903          | 364.0000       |            |
| 96.7106          | 321.0000       |            |
| 96.7308          | 344.0000       |            |
| 96.7510          | 334.0000       |            |
| 96.7712          | 323.0000       |            |
| 96.7914          | 318.0000       |            |
| 96.8116          | 322.0000       |            |
| 96.8318          | 307.0000       |            |
| 96.8521          | 341.0000       |            |
| 96.8723          | 319.0000       |            |
| 96.8925          | 349.0000       |            |
| 96.9127          | 327.0000       |            |
| 96.9329          | 334.0000       |            |
| 96.9531          | 359.0000       |            |
| 96.9733          | 341.0000       |            |
| 96.9936          | 315.0000       |            |
| 97.0138          | 366.0000       |            |
| 97.0340          | 325.0000       |            |

| Dec 04, 14 17:43 | Na2TeC2-xy.txt | Page 67/69 |
|------------------|----------------|------------|
| 97.0542          | 294.0000       |            |
| 97.0744          | 335.0000       |            |
| 97.0946          | 315.0000       |            |
| 97.1148          | 304.0000       |            |
| 97.1351          | 333.0000       |            |
| 97.1553          | 342.0000       |            |
| 97.1755          | 341.0000       |            |
| 97.1957          | 335.0000       |            |
| 97.2159          | 325.0000       |            |
| 97.2361          | 352.0000       |            |
| 97.2563          | 343.0000       |            |
| 97.2766          | 320.0000       |            |
| 97.2968          | 335.0000       |            |
| 97.3170          | 331.0000       |            |
| 97.3372          | 359.0000       |            |
| 97.3574          | 317.0000       |            |
| 97.3776          | 363.0000       |            |
| 97.3978          | 329.0000       |            |
| 97.4181          | 331.0000       |            |
| 97.4383          | 340.0000       |            |
| 97.4585          | 363.0000       |            |
| 97.4787          | 347.0000       |            |
| 97.4989          | 325.0000       |            |
| 97.5191          | 347.0000       |            |
| 97.5393          | 319.0000       |            |
| 97.5596          | 318.0000       |            |
| 97.5798          | 315.0000       |            |
| 97.6000          | 343.0000       |            |
| 97.6202          | 339.0000       |            |
| 97.6404          | 353.0000       |            |
| 97.6606          | 317.0000       |            |
| 97.6808          | 377.0000       |            |
| 97.7011          | 375.0000       |            |
| 97.7213          | 345.0000       |            |
| 97.7415          | 354.0000       |            |
| 97.7617          | 341.0000       |            |
| 97.7819          | 367.0000       |            |
| 97.8021          | 354.0000       |            |
| 97.8223          | 388.0000       |            |
| 97.8426          | 326.0000       |            |
| 97.8628          | 348.0000       |            |
| 97.8830          | 365.0000       |            |
| 97.9032          | 356.0000       |            |
| 97.9234          | 314.0000       |            |
| 97.9436          | 346.0000       |            |
| 97.9638          | 368.0000       |            |
| 97.9841          | 350.0000       |            |
| 98.0043          | 342.0000       |            |
| 98.0245          | 368.0000       |            |
| 98.0447          | 312.0000       |            |
| 98.0649          | 340.0000       |            |
| 98.0851          | 338.0000       |            |
| 98.1053          | 350.0000       |            |
| 98.1256          | 353.0000       |            |
| 98.1458          | 351.0000       |            |
| 98.1660          | 384.0000       |            |
| 98.1862          | 325.0000       |            |
| 98.2064          | 369.0000       |            |
| 98.2266          | 321.0000       |            |
| 98.2468          | 362.0000       |            |
| 98.2671          | 347.0000       |            |
| 98.2873          | 358.0000       |            |
| 98.3075          | 354.0000       |            |
| 98.3277          | 363.0000       |            |
| 98.3479          | 361.0000       |            |
| 98.3681          | 343.0000       |            |
| 98.3883          | 337.0000       |            |
| 98.4086          | 351.0000       |            |
| 98.4288          | 345.0000       |            |

| Dec 04, 14 17:43 | Na2TeC2-xy.txt | Page 68/69 |
|------------------|----------------|------------|
| 98.4490          | 351.0000       |            |
| 98.4692          | 354.0000       |            |
| 98.4894          | 369.0000       |            |
| 98.5096          | 381.0000       |            |
| 98.5298          | 355.0000       |            |
| 98.5501          | 360.0000       |            |
| 98.5703          | 331.0000       |            |
| 98.5905          | 380.0000       |            |
| 98.6107          | 370.0000       |            |
| 98.6309          | 357.0000       |            |
| 98.6511          | 372.0000       |            |
| 98.6713          | 360.0000       |            |
| 98.6916          | 365.0000       |            |
| 98.7118          | 360.0000       |            |
| 98.7320          | 381.0000       |            |
| 98.7522          | 383.0000       |            |
| 98.7724          | 364.0000       |            |
| 98.7926          | 350.0000       |            |
| 98.8129          | 376.0000       |            |
| 98.8331          | 358.0000       |            |
| 98.8533          | 388.0000       |            |
| 98.8735          | 327.0000       |            |
| 98.8937          | 378.0000       |            |
| 98.9139          | 367.0000       |            |
| 98.9341          | 357.0000       |            |
| 98.9544          | 370.0000       |            |
| 98.9746          | 358.0000       |            |
| 98.9948          | 361.0000       |            |
| 99.0150          | 356.0000       |            |
| 99.0352          | 339.0000       |            |
| 99.0554          | 356.0000       |            |
| 99.0756          | 355.0000       |            |
| 99.0959          | 384.0000       |            |
| 99.1161          | 357.0000       |            |
| 99.1363          | 420.0000       |            |
| 99.1565          | 366.0000       |            |
| 99.1767          | 362.0000       |            |
| 99.1969          | 387.0000       |            |
| 99.2171          | 380.0000       |            |
| 99.2374          | 386.0000       |            |
| 99.2576          | 370.0000       |            |
| 99.2778          | 397.0000       |            |
| 99.2980          | 349.0000       |            |
| 99.3182          | 352.0000       |            |
| 99.3384          | 363.0000       |            |
| 99.3586          | 352.0000       |            |
| 99.3789          | 383.0000       |            |
| 99.3991          | 375.0000       |            |
| 99.4193          | 350.0000       |            |
| 99.4395          | 348.0000       |            |
| 99.4597          | 342.0000       |            |
| 99.4799          | 383.0000       |            |
| 99.5001          | 345.0000       |            |
| 99.5204          | 319.0000       |            |
| 99.5406          | 385.0000       |            |
| 99.5608          | 377.0000       |            |
| 99.5810          | 372.0000       |            |
| 99.6012          | 388.0000       |            |
| 99.6214          | 357.0000       |            |
| 99.6416          | 394.0000       |            |
| 99.6619          | 332.0000       |            |
| 99.6821          | 339.0000       |            |
| 99.7023          | 361.0000       |            |
| 99.7225          | 379.0000       |            |
| 99.7427          | 363.0000       |            |
| 99.7629          | 381.0000       |            |
| 99.7831          | 336.0000       |            |
| 99.8034          | 353.0000       |            |
| 99.8236          | 380.0000       |            |

Dec 04, 14 17:43

Na<sub>2</sub>TeC<sub>2</sub>-xy.txt

Page 69/69

```
99.8438 362.0000
99.8640 358.0000
99.8842 338.0000
99.9044 385.0000
99.9246 370.0000
99.9449 357.0000
99.9651 354.0000
99.9853 341.0000
100.0055      379.0000
```
